# Supplementary material for: Calculating the Aqueous pKa of Phenols: Predictions for Antioxidants and Cannabinoids
Source: MDPI journal article supplement (doi:10.3390/antiox12071420), 2023-07-13
Supplement: s1 [file s1]

# Calculating the aqueous $pK_a$ of phenols: Predictions for antioxidants and cannabinoids

Max Walton-Raaby<sup>1,2</sup>, Tyler Floen<sup>1</sup>, Guillermo García-Díez<sup>1</sup>, and Nelaine Mora-Díez<sup>1\*</sup>

<sup>1</sup> Department of Chemistry, Thompson Rivers University, Kamloops, BC V2C 0C8, Canada

<sup>2</sup> Department of Chemistry, University of Waterloo, Waterloo, ON N2L 3G1, Canada

## Electronic Supplementary Information

(108 pages)

### Contents:

**Table S1.** Absolute Gibbs free energies of the different species considered in this study calculated at the M06-2X/6-311++G(d,p) level of theory in water at 298.15 K.

**Table S2.** Absolute Gibbs free energies of the different species considered in this study calculated at the B3LYP/6-311++G(d,p) level of theory in water at 298.15 K.

**Table S3.** Absolute Gibbs free energies of the different species considered in this study calculated at the BHandHLYP/6-311++G(d,p) level of theory in water at 298.15 K.

**Table S4.** Absolute Gibbs free energies of the different species considered in this study calculated at the PBE0/6-311++G(d,p) level of theory in water at 298.15 K.

**Table S5.** Absolute Gibbs free energies of the different species considered in this study calculated at the TPSS/6-311G(d,p) level of theory in water at 298.15 K.

**Table S6.** Calculated aqueous  $pK_a$  values at 298.15 K and the mean absolute error (MAE) at several levels of theory using Reaction 1 for direct calculations.

**Table S7.** Calculated  $pK_a$  errors and the mean absolute error (MAE) at several levels of theory using Reaction 1 for direct calculations.

**Table S8.** Calculated aqueous  $pK_a$  values at 298.15 K and the mean absolute error (MAE) at several levels of theory using Reaction 2 for direct calculations.

**Table S9.** Calculated  $pK_a$  errors and the mean absolute error (MAE) at several levels of theory using Reaction 2 for direct calculations.

---

\* Corresponding author e-mail: nmora@tru.ca

**Table S10.** Calculated aqueous  $pK_a$  values at 298.15 K and the mean absolute error (MAE) at several levels of theory using Reaction 3 (HRef=phenol) for direct calculations.

**Table S11.** Calculated aqueous  $pK_a$  values at 298.15 K and the mean absolute error (MAE) at several levels of theory after using the corresponding  $pK_{a(\text{exp})}$  vs.  $\Delta G_{aq(BA)}^\circ$  correlation equation.

**Table S12.** Predicted aqueous  $pK_a$  values for the phenols in the test set (21–30) using the corresponding  $pK_{a(\text{exp})}$  vs.  $\Delta G_{aq(BA)}^\circ$  correlation equation listed in Table 4 (obtained from a training set of 20 phenols) at several levels of theory at 298.15 K.

**Table S13.** Predicted aqueous  $pK_a$  values for molecules 25, 26, 29–50 at levels of theory not shown in Table 6.

Cartesian coordinates of the optimized acids and conjugate bases studied at the M06–2X(SMD)/6–311++G(d,p) level of theory.

**Table S1.** Absolute Gibbs free energies ( $G^\circ$  in au) of the different species considered in this study calculated at the M06-2X/6-311++G(d,p) level of theory in water at 298.15 K.

| Solvent Method                           | SMD         |                |                                   | PCM         |                |                                   |
|------------------------------------------|-------------|----------------|-----------------------------------|-------------|----------------|-----------------------------------|
| Species                                  | HA          | A <sup>-</sup> | A <sup>-</sup> (H <sub>2</sub> O) | HA          | A <sup>-</sup> | A <sup>-</sup> (H <sub>2</sub> O) |
| (1) 2,4-dinitrophenol                    | -716.34127  | -715.90372     | -792.32794                        | -716.34311  | -715.90374     | -792.32614                        |
| (2) 4-nitrosophenol                      | -436.65558  | -436.21057     |                                   | -436.65073  | -436.20520     |                                   |
| (3) 4-nitrophenol                        | -511.85569  | -511.40873     | -587.83366                        | -511.85344  | -511.40563     | -587.82822                        |
| (4) 2-nitrophenol                        | -511.85052  | -511.40248     | -587.82714                        | -511.85085  | -511.39785     | -587.82189                        |
| (5) 4-hydroxy-3-methoxybenzaldehyde      | -535.15960  | -534.70737     |                                   | -535.15670  | -534.69960     |                                   |
| (6) 2,3-dichlorophenol                   | -1226.57647 | -1226.12438    |                                   | -1226.57482 | -1226.12056    |                                   |
| (7) 3-cyanophenol                        | -399.60362  | -399.14755     | -475.57331                        | -399.60147  | -399.14334     | -475.56889                        |
| (8) 4-trifluoromethylphenol              | -644.41405  | -643.95923     |                                   | -644.41197  | -643.95163     |                                   |
| (9) 2-fluorophenol                       | -406.60540  | -406.14853     |                                   | -406.60271  | -406.14217     |                                   |
| (10) 3-hydroxybenzaldehyde               | -420.67384  | -420.21532     | -496.64183                        | -420.66927  | -420.20753     | -496.63329                        |
| (11) 3-chlorophenol                      | -766.97063  | -766.51324     |                                   | -766.96732  | -766.50684     |                                   |
| (12) 4-bromophenol                       | -2880.94417 | -2880.48565    | -2956.91193                       | -2880.94031 | -2880.47854    | -2956.90369                       |
| (13) acetaminophen                       | -515.32025  | -514.85938     | -591.28665                        | -515.31299  | -514.84677     | -591.27351                        |
| (14) 3-methoxyphenol                     | -421.84403  | -421.38302     | -497.80982                        | -421.84015  | -421.37461     | -497.80060                        |
| (15) 4-(2-aminoethyl)phenol              | -441.25260  | -440.78994     |                                   | -441.24535  | -440.77782     |                                   |
| (15) 4-(2-aminoethyl)phenol <sup>+</sup> | -441.69972  |                |                                   |             |                |                                   |
| (16) phenol                              | -307.35763  | -306.89629     | -383.32352                        | -307.35455  | -306.88809     | -383.31441                        |
| (17) 3-aminophenol                       | -362.70511  | -362.24286     |                                   | -362.69944  | -362.23170     |                                   |
| (17) 3-aminophenol <sup>+</sup>          | -363.13448  |                |                                   |             |                |                                   |
| (18) 4-methoxyphenol                     | -346.63854  | -346.17569     | -422.60274                        | -346.63663  | -346.16726     | -422.59243                        |
| (19) 4-methylphenol                      | -421.84041  | -421.37739     | -497.80418                        | -421.83586  | -421.36828     | -497.79514                        |
| (20) 2-(tertbutyl)phenol                 | -464.46606  | -464.00176     |                                   | -464.46447  | -463.99582     |                                   |
| OH·(3H <sub>2</sub> O) <sup>a</sup>      | -305.23665  |                |                                   | -305.21521  |                |                                   |
| 3H <sub>2</sub> O <sup>a</sup>           | -229.27658  |                |                                   | -229.26291  |                |                                   |
| (21) 2-bromophenol                       | -2880.94086 | -2880.48449    |                                   | -2880.94011 | -2880.48187    |                                   |
| (22) 2-chlorophenol                      | -766.96795  | -766.51298     |                                   | -766.96637  | -766.50746     |                                   |
| (23) 4-(methylthio)phenol                | -744.82252  | -744.36302     |                                   | -744.82025  | -744.35738     |                                   |

|                                                            |             |             |             |             |
|------------------------------------------------------------|-------------|-------------|-------------|-------------|
| (24) 4-aminophenol                                         | -362.70156  | -362.23638  | -362.69550  | -362.22452  |
| (24) 4-aminophenol <sup>+</sup>                            | -363.13416  |             |             |             |
| (25) ketobemidone                                          | -789.02875  | -788.56744  | -789.01867  | -788.55183  |
| (25) ketobemidone <sup>+</sup>                             | -789.47983  |             |             |             |
| (26) profadol                                              | -675.71002  | -675.24765  | -675.70625  | -675.23790  |
| (26) profadol <sup>+</sup>                                 | -676.15987  |             |             |             |
| (27) tapentadol                                            | -676.89110  | -676.42847  | -676.88750  | -676.41988  |
| (27) tapentadol <sup>+</sup>                               | -677.34209  |             |             |             |
| (28) (R)-Trolox                                            | -844.47987  | -844.01079  | -844.46292  | -843.98648  |
| (29) $\Delta^9$ -tetrahydrocannabinol ( $\Delta^9$ -THC)   | -968.19007  | -967.72885  | -968.18884  | -967.72114  |
| (30) cannabidiol anion C1' (anion 2)                       | -968.17420  | -967.71181  | -968.17034  | -967.70117  |
| (30) cannabidiol anion C3' (anion 1)                       | -968.17420  | -967.71231  | -968.17034  | -967.70159  |
| (31) 2-tert-butyl-4-methoxyphenol                          | -578.94974  | -578.48286  | -578.94781  | -578.47639  |
| (32) 3-tert-butyl-4-methoxyphenol                          | -578.94860  | -578.48340  | -578.94721  | -578.47563  |
| (33) tocol                                                 | -577.79209  | -577.32746  | -577.78791  | -577.31685  |
| (34) $\delta$ -tocopherol                                  | -617.07329  | -616.60811  | -617.06993  | -616.59773  |
| (35) $\beta$ -tocopherol                                   | -656.35341  | -655.88700  | -656.35021  | -655.87680  |
| (36) $\gamma$ -tocopherol                                  | -656.35192  | -655.88513  | -656.34913  | -655.87531  |
| (37) $\alpha$ -tocopherol                                  | -695.63050  | -695.16339  | -695.62799  | -695.15320  |
| (38) N,N-dimethyl-p-aminophenol                            | -441.23290  | -440.76782  | -441.22770  | -440.75729  |
| (39) 6-hydroxy-5,7,8-trimethyl-1,2,3,4-tetrahydroquinoline | -597.18576  | -596.71719  | -597.18073  | -596.70509  |
| (40) 9-hydroxyjulolidine                                   | -596.00086  | -595.53438  | -595.99503  | -595.52150  |
| (41) 4-butadienylphenol                                    | -462.071469 | -461.612632 | -462.06967  | -461.60683  |
| (42) 4-hydroxystilbene                                     | -615.66222  | -615.20169  | -615.65803  | -615.19510  |
| (43) $\Delta^8$ -tetrahydrocannabinol ( $\Delta^8$ -THC)   | -968.19554  | -967.73290  | -968.19321  | -967.72550  |
| (44) iso-tetrahydrocannabinol (iso-THC)                    | -968.18463  | -967.72254  | -968.18302  | -967.71412  |
| (45) $\Delta^9$ -tetrahydrocannabivarin (THCV)             | -889.63655  | -889.17526  | -889.63460  | -889.16854  |
| (46) 3-homotetrahydrocannabinol                            | -1007.47165 | -1007.01038 | -1007.47049 | -1007.00530 |
| (47) nabilone                                              | -1161.26352 | -1160.80174 | -1161.26039 | -1160.79355 |
| (48) cannabinol (CBN)                                      | -965.85158  | -965.39495  | -965.85009  | -965.38877  |
| (49) cannabichromene (CBC)                                 | -968.16769  | -967.71093  | -968.16662  | -967.70439  |
| (50) cannabigerol anion C1' (anion 2)                      | -969.35211  | -968.89016  | -969.34985  | -968.88129  |

|                                       |            |            |            |            |
|---------------------------------------|------------|------------|------------|------------|
| (50) cannabigerol anion C3' (anion 1) | -969.35211 | -968.89024 | -969.34985 | -968.88108 |
|---------------------------------------|------------|------------|------------|------------|

<sup>a</sup> These are not HA values; <sup>+</sup> These are species with the protonated amino group.

**Table S2.** Absolute Gibbs free energies ( $G^\circ$  in au) of the different species considered in this study calculated at the B3LYP/6-311++G(d,p) level of theory in water at 298.15 K.

| Solvent Method                      | SMD         |                |                                   | PCM         |                |                                   |
|-------------------------------------|-------------|----------------|-----------------------------------|-------------|----------------|-----------------------------------|
| Species                             | HA          | A <sup>-</sup> | A <sup>-</sup> (H <sub>2</sub> O) | HA          | A <sup>-</sup> | A <sup>-</sup> (H <sub>2</sub> O) |
| (1) 2,4-dinitrophenol               | -716.62725  | -716.18925     | -792.64812                        | -716.62928  | -716.18964     | -792.64714                        |
| (2) 4-nitrosophenol                 | -436.83813  | -436.39520     |                                   | -436.83290  | -436.39028     |                                   |
| (3) 4-nitrophenol                   | -512.06668  | -511.62107     | -588.08251                        | -512.06448  | -511.61855     | -588.07884                        |
| (4) 2-nitrophenol                   | -512.06231  | -511.61319     | -588.07310                        | -512.06286  | -511.60949     | -588.06826                        |
| (5) 4-hydroxy-3-methoxybenzaldehyde | -535.38104  | -534.92926     |                                   | -535.37874  | -534.92266     |                                   |
| (6) 2,3-dichlorophenol              | -1226.75443 | -1226.30151    |                                   | -1226.75337 | -1226.29852    |                                   |
| (7) 3-cyanophenol                   | -399.76768  | -399.31093     | -475.77417                        | -399.76575  | -399.30763     | -475.76928                        |
| (8) 4-trifluoromethylphenol         | -644.64666  | -644.19031     |                                   | -644.64548  | -644.18856     |                                   |
| (9) 2-fluorophenol                  | -406.76788  | -406.31084     |                                   | -406.76606  | -406.30564     |                                   |
| (10) 3-hydroxybenzaldehyde          | -420.85081  | -420.39203     | -496.85481                        | -420.84655  | -420.38541     | -496.84767                        |
| (11) 3-chlorophenol                 | -767.12829  | -766.67029     |                                   | -767.12545  | -766.66493     |                                   |
| (12) 4-bromophenol                  | -2881.05018 | -2880.59081    | -2957.05347                       | -2881.04666 | -2880.58466    | -2957.04925                       |
| (13) acetaminophen                  | -515.53818  | -515.07726     | -591.53859                        | -515.53236  | -515.06500     | -591.52886                        |
| (14) 3-methoxyphenol                | -422.02400  | -421.56193     | -498.02496                        | -422.02069  | -421.55469     | -498.01719                        |
| (15) 4-(2-aminoethyl)phenol         | -441.45095  | -440.98748     |                                   | -441.44434  | -440.97678     |                                   |
| (16) phenol                         | -307.49340  | -307.03138     | -383.49481                        | -307.49086  | -307.02444     | -383.48697                        |
| (17) 3-aminophenol                  | -362.86187  | -362.39853     |                                   | -362.85687  | -362.38860     |                                   |
| (18) 4-methoxyphenol                | -346.79550  | -346.33243     | -422.79559                        | -346.79446  | -346.32514     | -422.78799                        |
| (19) 4-methylphenol                 | -422.02145  | -421.55658     | -498.02017                        | -422.01794  | -421.54901     | -498.01270                        |
| (20) 2-(tertbutyl)phenol            | -464.67803  | -464.21209     |                                   | -464.67697  | -464.20799     |                                   |
| OH(3H <sub>2</sub> O) <sup>a</sup>  | -305.38436  |                |                                   | -305.36986  |                |                                   |
| 3H <sub>2</sub> O <sup>a</sup>      | -229.38818  |                |                                   | -229.37576  |                |                                   |
| (21) 2-bromophenol                  | -2881.04637 | -2880.58911    |                                   | -2881.04598 | -2880.58708    |                                   |
| (22) 2-chlorophenol                 | -767.12505  | -766.66937     |                                   | -767.12400  | -766.66482     |                                   |

|                                                            |             |             |             |             |
|------------------------------------------------------------|-------------|-------------|-------------|-------------|
| (23) 4-(methylthio)phenol                                  | -745.00849  | -744.54830  | -745.00675  | -744.54386  |
| (24) 4-aminophenol                                         | -362.85854  | -362.39233  | -362.85314  | -362.38161  |
| (25) ketobemidone                                          | -789.36711  | -788.90336  | -789.36287  | -788.88986  |
| (26) profadol                                              | -676.01239  | -675.54887  | -676.00947  | -675.54039  |
| (27) tapentadol                                            | -677.20492  | -676.74097  | -677.20268  | -676.73465  |
| (28) (R)-Trolox                                            | -844.82100  | -844.35242  | -844.80887  | -844.32976  |
| (29) $\Delta^9$ -tetrahydrocannabinol ( $\Delta^9$ -THC)   | -968.62019  | -968.15638  | -968.61997  | -968.15126  |
| (30) cannabidiol anion C1' (anion 2)                       | -968.60956  | -968.14501  | -968.60749  | -968.13820  |
| (30) cannabidiol anion C3' (anion 1)                       | -968.60956  | -968.14465  | -968.60749  | -968.13845  |
| (31) 2-tert-butyl-4-methoxyphenol                          | -579.20572  | -578.73756  | -579.20449  | -578.73288  |
| (32) 3-tert-butyl-4-methoxyphenol                          | -579.20424  | -578.73826  | -579.20361  | -578.73196  |
| (33) tocol                                                 | -578.03835  | -577.57284  | -578.03530  | -577.56379  |
| (34) $\delta$ -tocopherol                                  | -617.33956  | -616.87327  | -617.33727  | -616.86434  |
| (35) $\beta$ -tocopherol                                   | -656.63845  | -656.17058  | -656.63648  | -656.16200  |
| (36) $\gamma$ -tocopherol                                  | -656.63808  | -656.16925  | -656.63560  | -656.16131  |
| (37) $\alpha$ -tocopherol                                  | -695.93509  | -695.46599  | -695.93349  | -695.45796  |
| (38) N,N-dimethyl-p-aminophenol                            | -441.42997  | -440.96324  | -441.42595  | -440.95435  |
| (39) 6-hydroxy-5,7,8-trimethyl-1,2,3,4-tetrahydroquinoline | -597.44981  | -596.97890  | -597.44533  | -596.96794  |
| (40) 9-hydroxyjulolidine                                   | -596.25409  | -595.78634  | -596.24927  | -595.77487  |
| (41) 4-butadienylphenol                                    | -462.28147  | -461.82250  | -462.28000  | -461.81848  |
| (42) 4-hydroxystilbene                                     | -615.93072  | -615.47043  | -615.92749  | -615.46548  |
| (43) $\Delta^8$ -tetrahydrocannabinol ( $\Delta^8$ -THC)   | -968.62446  | -968.15973  | -968.62359  | -968.15511  |
| (44) iso-tetrahydrocannabinol (iso-THC)                    | -968.61274  | -968.14870  | -968.61234  | -968.14292  |
| (45) $\Delta^9$ -tetrahydrocannabivarin (THCV)             | -890.02377  | -889.56026  | -890.02308  | -889.55463  |
| (46) 3-homotetrahydrocannabinol                            | -1007.92487 | -1007.46107 | -1007.92536 | -1007.45817 |
| (47) nabilone                                              | -1161.77384 | -1161.30984 | -1161.77091 | -1161.30288 |
| (48) cannabinol (CBN)                                      | -966.27597  | -965.81533  | -966.27540  | -965.81144  |
| (49) cannabichromene (CBC)                                 | -968.61209  | -968.15309  | -968.61232  | -968.14988  |
| (50) cannabigerol anion C1' (anion 2)                      | -969.81028  | -969.34779  | -969.80888  | -969.34005  |
| (50) cannabigerol anion C3' (anion 1)                      | -969.81028  | -969.34760  | -969.80888  | -969.33990  |

<sup>a</sup> These are not HA values.

**Table S3.** Absolute Gibbs free energies ( $G^\circ$  in au) of the different species considered in this study calculated at the BHandHLYP/6-311++G(d,p) level of theory in water at 298.15 K.

| Solvent Method                      | SMD         |                |                      | PCM         |                |                      |
|-------------------------------------|-------------|----------------|----------------------|-------------|----------------|----------------------|
| Species                             | HA          | A <sup>-</sup> | A-(H <sub>2</sub> O) | HA          | A <sup>-</sup> | A-(H <sub>2</sub> O) |
| (1) 2,4-dinitrophenol               | -716.20270  | -715.76102     | -792.17651           | -716.20380  | -715.76029     | -792.17333           |
| (2) 4-nitrosophenol                 | -436.57252  | -436.12396     |                      | -436.56743  | -436.11772     |                      |
| (3) 4-nitrophenol                   | -511.75837  | -511.30773     | -587.72474           | -511.75590  | -511.30385     | -587.72017           |
| (4) 2-nitrophenol                   | -511.75301  | -511.30162     | -587.71662           | -511.75316  | -511.29434     | -587.70948           |
| (5) 4-hydroxy-3-methoxybenzaldehyde | -535.06272  | -534.60549     |                      | -535.05970  | -534.59703     |                      |
| (6) 2,3-dichlorophenol              | -1226.53704 | -1226.07976    |                      | -1226.53543 | -1226.07558    |                      |
| (7) 3-cyanophenol                   | -399.52327  | -399.06201     | -475.48042           | -399.52109  | -399.05730     | -475.47468           |
| (8) 4-trifluoromethylphenol         | -644.32771  | -643.86628     |                      | -644.32536  | -643.86322     |                      |
| (9) 2-fluorophenol                  | -406.54132  | -406.07973     |                      | -406.53890  | -406.07304     |                      |
| (10) 3-hydroxybenzaldehyde          | -420.59818  | -420.13463     | -496.55273           | -420.59324  | -420.12607     | -496.54411           |
| (11) 3-chlorophenol                 | -766.92338  | -766.46105     |                      | -766.92023  | -766.45431     |                      |
| (12) 4-bromophenol                  | -2880.81902 | -2880.35559    | -2956.77379          | -2880.81534 | -2880.34815    | -2956.76606          |
| (13) acetaminophen                  | -515.22530  | -514.75923     | -591.17749           | -515.21769  | -514.74714     | -591.16430           |
| (14) 3-methoxyphenol                | -421.76640  | -421.30054     | -497.71903           | -421.76288  | -421.29211     | -497.71013           |
| (15) 4-(2-aminoethyl)phenol         | -441.16937  | -440.70158     |                      | -441.16222  | -440.68921     |                      |
| (16) phenol                         | -307.30117  | -306.83495     | -383.25348           | -307.29828  | -306.82652     | -383.24449           |
| (17) 3-aminophenol                  | -362.63582  | -362.16891     |                      | -362.63044  | -362.15759     |                      |
| (18) 4-methoxyphenol                | -346.57483  | -346.10768     | -422.52680           | -346.57338  | -346.09873     | -422.51719           |
| (19) 4-methylphenol                 | -421.76351  | -421.29487     | -497.71338           | -421.75959  | -421.28572     | -497.70429           |
| (20) 2-(tertbutyl)phenol            | -464.37427  | -463.90440     |                      | -464.37295  | -463.89836     |                      |
| OH·(3H <sub>2</sub> O) <sup>a</sup> | -305.20053  |                |                      | -305.18356  |                |                      |
| 3H <sub>2</sub> O <sup>a</sup>      | -229.25496  |                |                      | -229.24263  |                |                      |
| (21) 2-bromophenol                  | -2880.81498 | -2880.35358    |                      | -2880.81439 | -2880.35067    |                      |
| (22) 2-chlorophenol                 | -766.92007  | -766.46032     |                      | -766.91870  | -766.45453     |                      |
| (23) 4-(methylthio)phenol           | -744.76868  | -744.30360     |                      | -744.76582  | -744.29779     |                      |
| (24) 4-aminophenol                  | -362.63215  | -362.16168     |                      | -362.62630  | -362.14946     |                      |
| (25) ketobemidone                   | -788.86648  | -788.39958     |                      | -788.86239  | -788.38373     |                      |

|                                                            |             |             |             |             |
|------------------------------------------------------------|-------------|-------------|-------------|-------------|
| (26) profadol                                              | -675.57133  | -675.10386  | -675.56805  | -675.09374  |
| (27) tapentadol                                            | -676.75530  | -676.28727  | -676.75245  | -676.27926  |
| (28) (R)-Trolox                                            | -844.30813  | -843.83323  | -844.29279  | -843.80896  |
| (29) $\Delta^9$ -tetrahydrocannabinol ( $\Delta^9$ -THC)   | -967.99408  | -967.52695  | -967.99343  | -967.51988  |
| (30) cannabidiol anion C1' (anion 2)                       | -967.97908  | -967.51080  | -967.97643  | -967.50218  |
| (30) cannabidiol anion C3' (anion 1)                       | -967.97908  | -967.51050  | -967.97643  | -967.50186  |
| (31) 2-tert-butyl-4-methoxyphenol                          | -578.83484  | -578.36429  | -578.83504  | -578.35792  |
| (32) 3-tert-butyl-4-methoxyphenol                          | -578.83527  | -578.36527  | -578.83419  | -578.35722  |
| (33) tocol                                                 | -577.67851  | -577.20884  | -577.67480  | -577.19804  |
| (34) $\delta$ -tocopherol                                  | -616.95166  | -616.48134  | -616.94875  | -616.47072  |
| (35) $\beta$ -tocopherol                                   | -656.22238  | -655.75068  | -656.21996  | -655.74013  |
| (36) $\gamma$ -tocopherol                                  | -656.22142  | -655.75073  | -656.21889  | -655.73918  |
| (37) $\alpha$ -tocopherol                                  | -695.49044  | -695.01743  | -695.48854  | -695.00740  |
| (38) N,N-dimethyl-p-aminophenol                            | -441.14601  | -440.67608  | -441.14175  | -440.66606  |
| (39) 6-hydroxy-5,7,8-trimethyl-1,2,3,4-tetrahydroquinoline | -597.06268  | -596.58865  | -597.05815  | -596.57622  |
| (40) 9-hydroxyjulolidine                                   | -595.87716  | -595.40544  | -595.87174  | -595.39243  |
| (41) 4-butadienylphenol                                    | -461.98384  | -461.52009  | -461.98196  | -461.51416  |
| (42) 4-hydroxystilbene                                     | -615.53886  | -615.07383  | -615.53523  | -615.06695  |
| (43) $\Delta^8$ -tetrahydrocannabinol ( $\Delta^8$ -THC)   | -967.99981  | -967.53003  | -967.99727  | -967.52376  |
| (44) iso-tetrahydrocannabinol (iso-THC)                    | -967.98671  | -967.51871  | -967.98518  | -967.51117  |
| (45) $\Delta^9$ -tetrahydrocannabivarin (THCV)             | -889.45387  | -888.98641  | -889.45267  | -888.97572  |
| (46) 3-homotetrahydrocannabinol                            | -1007.27006 | -1006.80207 | -1007.26992 | -1006.79758 |
| (47) nabilone                                              | -1161.03001 | -1160.56209 | -1161.02578 | -1160.55278 |
| (48) cannabinol (CBN)                                      | -965.65736  | -965.19267  | -965.65434  | -965.18752  |
| (49) cannabichromene (CBC)                                 | -967.97878  | -967.51647  | -967.97881  | -967.51134  |
| (50) cannabigerol anion C1' (anion 2)                      | -969.16884  | -968.70201  | -969.16796  | -968.69313  |
| (50) cannabigerol anion C3' (anion 1)                      | -969.16884  | -968.70274  | -969.16796  | -968.69312  |

<sup>a</sup> These are not HA values.



**Table S4.** Absolute Gibbs free energies ( $G^\circ$  in au) of the different species considered in this study calculated at the PBE0/6-311++G(d,p) level of theory in water at 298.15 K.

| <b>Solvent Method</b>               | <b>SMD</b>  |                      |                                      | <b>PCM</b>  |                      |                                      |
|-------------------------------------|-------------|----------------------|--------------------------------------|-------------|----------------------|--------------------------------------|
| <b>Species</b>                      | <b>HA</b>   | <b>A<sup>-</sup></b> | <b>A<sup>-</sup>(H<sub>2</sub>O)</b> | <b>HA</b>   | <b>A<sup>-</sup></b> | <b>A<sup>-</sup>(H<sub>2</sub>O)</b> |
| (1) 2,4-dinitrophenol               | -715.77315  | -715.33045           | -791.69793                           | -715.77564  | -715.33070           | -791.69719                           |
| (3) 4-nitrophenol                   | -511.44603  | -510.99578           | -510.99578                           | -511.44416  | -510.99290           | -587.36058                           |
| (4) 2-nitrophenol                   | -511.44164  | -510.98848           | -587.35679                           | -511.44251  | -510.98383           | -587.35115                           |
| (7) 3-cyanophenol                   | -399.26706  | -398.80752           | -475.17851                           | -399.26501  | -398.80348           | -475.17344                           |
| (10) 3-hydroxybenzaldehyde          | -420.33080  | -419.86907           | -496.23966                           | -420.32652  | -419.86158           | -496.23188                           |
| (12) 4-bromophenol                  | -2880.23489 | -2879.77295          | -2956.14457                          | -2880.23129 | -2879.76608          | -2956.13639                          |
| (13) acetaminophen                  | -514.90449  | -514.43995           | -590.81114                           | -514.89842  |                      | -590.79857                           |
| (14) 3-methoxyphenol                | -421.50221  | -421.03773           | -497.40884                           | -421.49896  | -421.02991           | -497.40053                           |
| (16) phenol                         | -307.10769  | -306.64285           | -383.01508                           | -307.10478  | -306.63494           | -383.00573                           |
| (18) 4-methoxyphenol                | -346.35993  | -345.89373           | -422.26531                           | -346.35583  | -345.88549           | -422.25734                           |
| (19) 4-methylphenol                 | -421.49930  | -421.03230           | -497.40410                           | -421.49599  | -421.02352           | -497.39493                           |
| (27) tapentadol                     | -676.35816  | -675.89170           |                                      | -676.35491  | -675.88363           |                                      |
| (28) (R)-Trolox                     | -843.80360  | -843.33028           |                                      | -843.78816  | -843.30682           |                                      |
| OH·(3H <sub>2</sub> O) <sup>a</sup> | -305.01088  |                      |                                      | -304.99414  |                      |                                      |
| 3H <sub>2</sub> O <sup>a</sup>      | -229.11229  |                      |                                      | -229.09912  |                      |                                      |

<sup>a</sup> These are not HA values.

**Table S5.** Absolute Gibbs free energies ( $G^\circ$  in au) of the different species considered in this study calculated at the TPSS/TPSS/6-311G(d,p) level of theory in water at 298.15 K.

| <b>Solvent Method</b>                            | <b>SMD</b>  |                      |                                      | <b>PCM</b>  |                      |                                      |
|--------------------------------------------------|-------------|----------------------|--------------------------------------|-------------|----------------------|--------------------------------------|
| <b>Species</b>                                   | <b>HA</b>   | <b>A<sup>-</sup></b> | <b>A<sup>-</sup>(H<sub>2</sub>O)</b> | <b>HA</b>   | <b>A<sup>-</sup></b> | <b>A<sup>-</sup>(H<sub>2</sub>O)</b> |
| (1) 2,4-dinitrophenol                            | -716.75430  | -716.31505           | -792.77469                           | -716.75718  | -716.31623           | -792.77538                           |
| (2) 4-nitrosophenol                              | -436.91077  | -436.46783           |                                      | -436.90558  | -436.46333           |                                      |
| (3) 4-nitrophenol                                | -512.15294  | -511.70732           | -588.16961                           | -512.15108  | -511.70531           | -588.16581                           |
| (4) 2-nitrophenol                                | -512.15016  | -511.69940           | -588.16080                           | -512.15121  | -511.69586           | -588.15548                           |
| (5) 4-hydroxy-3-methoxybenzaldehyde              | -535.46218  | -535.01060           |                                      | -535.46033  | -535.00480           |                                      |
| (6) 2,3-dichlorophenol                           | -1226.81756 | -1226.36476          |                                      | -1226.81725 | -1226.36223          |                                      |
| (7) 3-cyanophenol                                | -399.83039  | -399.37365           | -475.83672                           | -399.82877  | -399.37081           | -475.83407                           |
| (8) 4-trifluoromethylphenol                      | -644.72074  | -644.26467           |                                      | -644.72023  | -644.26309           |                                      |
| (9) 2-fluorophenol                               | -406.82243  | -406.36484           |                                      | -406.82076  | -406.36007           |                                      |
| (10) 3-hydroxybenzaldehyde                       | -420.91385  | -420.45515           | -496.91950                           | -420.91009  | -420.44919           | -496.91283                           |
| (11) 3-chlorophenol                              | -767.18279  | -766.72465           |                                      | -767.18021  | -766.71976           |                                      |
| (12) 4-bromophenol                               | -2880.97876 | -2880.51916          | -2956.98332                          | -2880.97551 | -2880.51349          | -2956.97777                          |
| (13) acetaminophen                               | -515.61381  | -515.15267           | -591.61548                           | -515.60794  | -515.14168           | -591.60679                           |
| (14) 3-methoxyphenol                             | -422.08726  | -421.62471           | -498.08952                           | -422.08439  | -421.61797           | -498.08216                           |
| (15) 4-(2-aminoethyl)phenol                      | -441.51485  | -441.05136           |                                      | -441.50870  | -441.04121           |                                      |
| (16) phenol                                      | -307.53979  | -307.07748           | -383.54275                           | -307.53756  | -307.07086           | -383.53506                           |
| (17) 3-aminophenol                               | -362.91386  | -362.45002           |                                      | -362.90912  | -362.44039           |                                      |
| (18) 4-methoxyphenol                             | -346.84785  | -346.38516           | -422.84918                           | -346.84687  | -346.37824           | -422.84321                           |
| (19) 4-methylphenol                              | -422.08451  | -421.61904           | -498.08443                           | -422.08162  | -421.61253           | -498.07772                           |
| (20) 2-(tertbutyl)phenol                         | -464.74994  | -464.28434           |                                      | -464.74929  | -464.28079           |                                      |
| OH <sup>-</sup> (3H <sub>2</sub> O) <sup>a</sup> | -305.38977  |                      |                                      | -305.37434  |                      |                                      |
| 3H <sub>2</sub> O <sup>a</sup>                   | -229.38937  |                      |                                      | -229.37862  |                      |                                      |
| (21) 2-bromophenol                               | -2880.97585 | -2880.51810          |                                      | -2880.97572 | -2880.51656          |                                      |
| (22) 2-chlorophenol                              | -767.17996  | -766.72401           |                                      | -767.17943  | -766.72401           |                                      |
| (23) 4-(methylthio)phenol                        | -745.06852  | -744.60612           |                                      | -745.06939  | -744.61005           |                                      |
| (24) 4-aminophenol                               | -362.91052  | -362.44426           |                                      | -362.90557  | -362.43394           |                                      |
| (25) ketobemidone                                | -789.49271  | -789.02899           |                                      | -789.48866  | -789.01582           |                                      |

|                                                            |            |            |             |             |
|------------------------------------------------------------|------------|------------|-------------|-------------|
| (26) profadol                                              | -676.12207 | -675.65849 | -676.11960  | -675.65055  |
| (27) tapentadol                                            | -677.31063 | -676.84663 | -677.30868  | -676.84040  |
| (28) (R)-Trolox                                            | -844.94665 | -844.47691 | -844.93496  | -844.45595  |
| (29) $\Delta^9$ -tetrahydrocannabinol ( $\Delta^9$ -THC)   | -968.77469 | -968.31119 | -968.77524  | -968.30656  |
| (30) cannabidiol anion C1' (anion 2)                       | -968.75933 | -968.29419 | -968.75801  | -968.28789  |
| (30) cannabidiol anion C3' (anion 1)                       | -968.75933 | -968.29512 | -968.75801  | -968.28895  |
| (31) 2-tert-butyl-4-methoxyphenol                          |            |            | -579.29377  | -578.82214  |
| (32) 3-tert-butyl-4-methoxyphenol                          |            |            | -579.29310  | -578.82136  |
| (33) tocol                                                 |            |            | -578.12562  | -577.65398  |
| (34) $\delta$ -tocopherol                                  |            |            | -617.43375  | -616.96070  |
| (35) $\beta$ -tocopherol                                   |            |            | -656.73978  | -656.26542  |
| (36) $\gamma$ -tocopherol                                  |            |            | -656.73903  | -656.26482  |
| (37) $\alpha$ -tocopherol                                  |            |            | -696.04380  | -695.56827  |
| (38) N,N-dimethyl-p-aminophenol                            |            |            | -441.49514  | -441.02286  |
| (39) 6-hydroxy-5,7,8-trimethyl-1,2,3,4-tetrahydroquinoline |            |            | -597.54080  | -597.06360  |
| (40) 9-hydroxyjulolidine                                   |            |            | -596.34740  | -595.87282  |
| (41) 4-butadienylphenol                                    |            |            | -462.35405  | -461.89339  |
| (42) 4-hydroxystilbene                                     |            |            | -616.03097  | -615.56982  |
| (43) $\Delta^8$ -tetrahydrocannabinol ( $\Delta^8$ -THC)   |            |            | -968.77869  | -968.30987  |
| (44) iso-tetrahydrocannabinol (iso-THC)                    |            |            | -968.76895  | -968.29897  |
| (45) $\Delta^9$ -tetrahydrocannabivarin (THCV)             |            |            | -890.16662  | -889.69787  |
| (46) 3-homotetrahydrocannabinol                            |            |            | -1008.08723 | -1007.62033 |
| (47) nabilone                                              |            |            | -1161.95430 | -1161.48680 |
| (48) cannabinol (CBN)                                      |            |            | -966.43415  | -965.96980  |
| (49) cannabichromene (CBC)                                 |            |            | -968.76591  | -968.30286  |
| (50) cannabigerol anion C1' (anion 2)                      |            |            | -969.95558  | -969.48664  |
| (50) cannabigerol anion C3' (anion 1)                      |            |            | -969.95558  | -969.48632  |

<sup>a</sup> These are not HA values.

**Table S6.** Calculated aqueous pK<sub>a</sub> values at 298.15 K and the mean absolute error (MAE) at several levels of theory using Reaction 1.

| Solvent Method                      |        | SMD   |           |       |          |  | PCM    |       |           |       |          |
|-------------------------------------|--------|-------|-----------|-------|----------|--|--------|-------|-----------|-------|----------|
| Name                                | M06-2X | B3LYP | BHandHLYP | PBE0  | TPSSTPSS |  | M06-2X | B3LYP | BHandHLYP | PBE0  | TPSSTPSS |
| (1) 2,4-dinitrophenol               | 3.13   | 3.34  | 5.03      | 5.50  | 3.91     |  | 3.97   | 4.10  | 5.88      | 6.53  | 4.70     |
| (2) 4-nitrosophenol                 | 6.56   | 5.61  | 8.20      |       | 5.61     |  | 6.81   | 5.47  | 8.72      |       | 5.30     |
| (3) 4-nitrophenol                   | 7.46   | 6.84  | 9.16      | 8.98  | 6.85     |  | 7.85   | 6.99  | 9.80      | 9.44  | 6.92     |
| (4) 2-nitrophenol                   | 7.96   | 8.46  | 9.50      | 10.32 | 9.21     |  | 10.24  | 10.41 | 12.92     | 12.86 | 11.32    |
| (5) 4-hydroxy-3-methoxybenzaldehyde | 9.89   | 9.68  | 12.19     |       | 9.59     |  | 12.13  | 11.66 | 14.69     |       | 11.40    |
| (6) 2,3-dichlorophenol              | 9.82   | 10.21 | 12.21     |       | 10.15    |  | 10.82  | 11.09 | 13.39     |       | 11.17    |
| (7) 3-cyanophenol                   | 11.66  | 11.97 | 14.04     | 13.25 | 11.96    |  | 12.60  | 12.60 | 3.20      | 14.16 | 12.52    |
| (8) 4-trifluoromethylphenol         | 11.08  | 11.78 | 14.12     |       | 11.65    |  | 13.62  | 12.05 | 14.45     |       | 12.15    |
| (9) 2-fluorophenol                  | 12.02  | 12.10 | 14.19     |       | 12.35    |  | 13.71  | 13.66 | 16.16     |       | 13.78    |
| (10) 3-hydroxybenzaldehyde          | 12.78  | 12.90 | 15.09     | 14.26 | 12.87    |  | 14.26  | 13.99 | 16.76     | 15.73 | 13.88    |
| (11) 3-chlorophenol                 | 12.26  | 12.55 | 14.54     |       | 12.60    |  | 13.68  | 13.70 | 16.18     |       | 13.67    |
| (12) 4-bromophenol                  | 12.78  | 13.17 | 15.04     | 14.36 | 13.28    |  | 14.27  | 14.38 | 16.77     | 15.86 | 14.39    |
| (13) acetaminophen                  | 13.86  | 13.89 | 16.25     | 15.55 | 13.98    |  | 16.32  | 16.85 | 18.32     |       | 16.34    |
| (14) 3-methoxyphenol                | 13.93  | 14.41 | 16.16     | 15.52 | 14.64    |  | 16.01  | 16.22 | 18.42     | 17.63 | 16.41    |
| (15) 4-(2-aminoethyl)phenol         | 14.68  | 15.06 | 17.05     |       | 15.07    |  | 16.92  | 16.94 | 19.45     |       | 16.91    |
| (16) phenol                         | 14.08  | 14.39 | 16.33     | 15.68 | 14.52    |  | 16.44  | 16.42 | 18.87     | 17.99 | 16.54    |
| (17) 3-aminophenol                  | 14.50  | 15.00 | 16.64     |       | 15.23    |  | 17.02  | 17.27 | 19.38     |       | 17.48    |
| (18) 4-methoxyphenol                | 14.85  | 15.70 | 17.44     | 16.68 | 15.97    |  | 16.95  | 17.57 | 19.84     | 19.20 | 17.64    |
| (19) 4-methylphenol                 | 14.55  | 15.08 | 16.90     | 16.19 | 15.11    |  | 17.30  | 17.64 | 20.20     | 17.63 | 17.62    |
| (20) 2-(tertbutyl)phenol            | 15.44  | 16.20 | 18.01     |       | 16.04    |  | 17.44  | 17.59 | 20.18     |       | 17.37    |
| MAE (20 phenols)                    | 3.09   | 3.43  | 5.24      | 4.66  | 3.48     |  | 4.76   | 4.77  | 7.05      | 6.15  | 4.84     |
| MSE (20 phenols)                    | 3.00   | 3.25  | 5.24      | 4.66  | 3.36     |  | 4.75   | 4.66  | 6.51      | 6.15  | 4.71     |

**Table S7.** Calculated pK<sub>a</sub> errors and the mean absolute error (MAE) at several levels of theory using Reaction 1.<sup>a</sup>

| Solvent Model                       |             | SMD         |             |             |             |  | PCM         |             |             |             |             |
|-------------------------------------|-------------|-------------|-------------|-------------|-------------|--|-------------|-------------|-------------|-------------|-------------|
| Name                                | M06-2X      | B3LYP       | BHandHLYP   | PBE0        | TPSSTPSS    |  | M06-2X      | B3LYP       | BHandHLYP   | PBE0        | TPSSTPSS    |
| (1) 2,4-dinitrophenol               | -0.94       | -0.73       | 0.96        | 1.43        | -0.16       |  | -0.10       | 0.03        | 1.81        | 2.46        | 0.63        |
| (2) 4-nitrosophenol                 | 0.23        | -0.72       | 1.87        |             | -0.72       |  | 0.48        | -0.86       | 2.39        |             | -1.03       |
| (3) 4-nitrophenol                   | 0.31        | -0.31       | 2.01        | 1.83        | -0.30       |  | 0.70        | -0.16       | 2.65        | 2.29        | -0.23       |
| (4) 2-nitrophenol                   | 0.73        | 1.23        | 2.27        | 3.09        | 1.98        |  | 3.01        | 3.18        | 5.69        | 5.63        | 4.09        |
| (5) 4-hydroxy-3-methoxybenzaldehyde | 2.49        | 2.28        | 4.79        |             | 2.19        |  | 4.73        | 4.26        | 7.30        |             | 4.01        |
| (6) 2,3-dichlorophenol              | 2.13        | 2.51        | 4.52        |             | 2.45        |  | 3.13        | 3.40        | 5.70        |             | 3.47        |
| (7) 3-cyanophenol                   | 3.05        | 3.36        | 5.43        | 4.64        | 3.35        |  | 3.99        | 3.99        | -5.41       | 5.55        | 3.91        |
| (8) 4-trifluoromethylphenol         | 2.41        | 3.11        | 5.45        |             | 2.98        |  | 4.94        | 3.37        | 5.77        |             | 3.47        |
| (9) 2-fluorophenol                  | 3.32        | 3.40        | 5.48        |             | 3.65        |  | 5.01        | 4.95        | 7.45        |             | 5.08        |
| (10) 3-hydroxybenzaldehyde          | 3.80        | 3.92        | 6.11        | 5.28        | 3.89        |  | 5.28        | 5.01        | 7.78        | 6.75        | 4.90        |
| (11) 3-chlorophenol                 | 3.14        | 3.42        | 5.41        |             | 3.48        |  | 4.56        | 4.58        | 7.06        |             | 4.55        |
| (12) 4-bromophenol                  | 3.41        | 3.80        | 5.67        | 4.99        | 3.91        |  | 4.90        | 5.01        | 7.40        | 6.49        | 5.02        |
| (13) acetaminophen                  | 4.36        | 4.39        | 6.75        | 6.05        | 4.48        |  | 6.82        | 7.35        | 8.82        |             | 6.84        |
| (14) 3-methoxyphenol                | 4.28        | 4.76        | 6.51        | 5.87        | 4.99        |  | 6.36        | 6.57        | 8.77        | 7.98        | 6.76        |
| (15) 4-(2-aminoethyl)phenol         | 4.94        | 5.32        | 7.31        |             | 5.33        |  | 7.18        | 7.20        | 9.71        |             | 7.17        |
| (16) phenol                         | 4.09        | 4.40        | 6.34        | 5.69        | 4.53        |  | 6.45        | 6.43        | 8.88        | 8.00        | 6.55        |
| (17) 3-aminophenol                  | 4.48        | 4.98        | 6.62        |             | 5.21        |  | 7.00        | 7.25        | 9.36        |             | 7.46        |
| (18) 4-methoxyphenol                | 4.64        | 5.49        | 7.23        | 6.47        | 5.76        |  | 6.74        | 7.36        | 9.63        | 8.99        | 7.43        |
| (19) 4-methylphenol                 | 4.29        | 4.82        | 6.64        | 5.93        | 4.85        |  | 7.04        | 7.38        | 9.94        | 7.37        | 7.36        |
| (20) 2-(tertbutyl)phenol            | 4.82        | 5.58        | 7.39        |             | 5.42        |  | 6.82        | 6.97        | 9.56        |             | 6.75        |
| <b>MAE (20 phenols)</b>             | <b>3.09</b> | <b>3.43</b> | <b>5.24</b> | <b>4.66</b> | <b>3.48</b> |  | <b>4.76</b> | <b>4.77</b> | <b>7.05</b> | <b>6.15</b> | <b>4.84</b> |
| <b>MSE (20 phenols)</b>             | <b>3.00</b> | <b>3.25</b> | <b>5.24</b> | <b>4.66</b> | <b>3.36</b> |  | <b>4.75</b> | <b>4.66</b> | <b>6.51</b> | <b>6.15</b> | <b>4.71</b> |

<sup>a</sup> The calculated aqueous pK<sub>a</sub> values at 298.15 K are reported in Table S6.

**Table S8.** Calculated aqueous pK<sub>a</sub> values at 298.15 K and the mean absolute error (MAE) at several levels of theory using Reaction 2.

| Solvent Method             | SMD    |       |           |       |          | PCM    |       |           |       |          |
|----------------------------|--------|-------|-----------|-------|----------|--------|-------|-----------|-------|----------|
| Name                       | M06-2X | B3LYP | BHandHLYP | PBE0  | TPSSTPSS | M06-2X | B3LYP | BHandHLYP | PBE0  | TPSSTPSS |
| (1) 2,4-dinitrophenol      | 6.99   | 7.87  | 6.24      | 7.18  | 10.03    | 5.09   | 8.30  | 6.07      | 7.02  | 8.89     |
| (3) 4-nitrophenol          | 11.00  | 10.20 | 9.67      | 9.73  | 11.75    | 8.90   | 9.91  | 8.50      | 9.39  | 10.49    |
| (4) 2-nitrophenol          | 11.62  | 12.52 | 10.93     | 11.62 | 14.53    | 10.62  | 14.03 | 12.16     | 12.97 | 15.30    |
| (7) 3-cyanophenol          | 14.81  | 14.49 | 13.91     | 13.32 | 16.51    | 12.28  | 14.90 | 13.41     | 13.06 | 14.83    |
| (10) 3-hydroxybenzaldehyde | 15.59  | 15.64 | 15.10     | 14.51 | 16.82    | 13.85  | 16.01 | 14.66     | 14.47 | 16.01    |
| (12) 4-bromophenol         | 15.70  | 15.97 | 15.00     | 14.13 | 17.32    | 14.14  | 15.33 | 14.73     | 14.60 | 16.23    |
| (13) acetaminophen         | 16.32  | 17.29 | 16.19     | 15.53 | 18.65    | 15.46  | 18.13 | 16.62     | 16.87 | 17.79    |
| (14) 3-methoxyphenol       | 16.60  | 17.04 | 15.99     | 15.54 | 18.38    | 15.49  | 18.13 | 16.33     | 16.22 | 18.29    |
| (16) phenol                | 16.56  | 16.83 | 16.13     | 15.18 | 18.05    | 15.76  | 18.31 | 16.81     | 16.50 | 18.42    |
| (18) 4-methoxyphenol       | 17.53  | 18.06 | 17.26     | 16.37 | 19.45    | 16.03  | 18.93 | 17.50     | 17.43 | 19.06    |
| (19) 4-methylphenol        | 17.33  | 17.44 | 16.29     | 16.11 | 18.81    | 17.63  | 19.50 | 17.91     | 16.25 | 18.95    |
| MAE (11 phenols)           | 5.75   | 5.89  | 5.22      | 4.73  | 7.38     | 4.75   | 6.58  | 5.43      | 5.27  | 6.83     |
| MSE (11 phenols)           | 5.54   | 5.84  | 4.87      | 4.56  | 7.38     | 4.19   | 6.58  | 5.06      | 5.06  | 6.83     |

**Table S9.** Calculated pK<sub>a</sub> errors and the mean absolute error (MAE) at several levels of theory using Reaction 2.<sup>a</sup>

| Solvent Model              |  | SMD    |       |           |      |          | PCM    |       |           |      |          |
|----------------------------|--|--------|-------|-----------|------|----------|--------|-------|-----------|------|----------|
| Name                       |  | M06-2X | B3LYP | BHandHLYP | PBE0 | TPSSTPSS | M06-2X | B3LYP | BHandHLYP | PBE0 | TPSSTPSS |
| (1) 2,4-dinitrophenol      |  | 2.92   | 3.80  | 2.17      | 3.11 | 5.96     | 1.02   | 4.23  | 2.00      | 2.95 | 4.82     |
| (3) 4-nitrophenol          |  | 3.85   | 3.05  | 2.52      | 2.58 | 4.60     | 1.75   | 2.76  | 1.35      | 2.24 | 3.34     |
| (4) 2-nitrophenol          |  | 4.39   | 5.29  | 3.70      | 4.39 | 7.30     | 3.39   | 6.80  | 4.93      | 5.74 | 8.07     |
| (7) 3-cyanophenol          |  | 6.20   | 5.88  | 5.30      | 4.71 | 7.90     | 3.67   | 6.29  | 4.80      | 4.45 | 6.22     |
| (10) 3-hydroxybenzaldehyde |  | 6.61   | 6.66  | 6.12      | 5.53 | 7.84     | 4.87   | 7.03  | 5.68      | 5.49 | 7.03     |
| (12) 4-bromophenol         |  | 6.33   | 6.60  | 5.63      | 4.76 | 7.95     | 4.77   | 5.96  | 5.36      | 5.23 | 6.86     |
| (13) acetaminophen         |  | 6.82   | 7.79  | 6.69      | 6.03 | 9.15     | 5.96   | 8.63  | 7.12      | 7.37 | 8.29     |
| (14) 3-methoxyphenol       |  | 6.95   | 7.39  | 6.34      | 5.89 | 8.73     | 5.84   | 8.48  | 6.68      | 6.57 | 8.64     |
| (16) phenol                |  | 6.57   | 6.84  | 6.14      | 5.19 | 8.06     | 5.77   | 8.32  | 6.82      | 6.51 | 8.43     |
| (18) 4-methoxyphenol       |  | 7.32   | 7.85  | 7.05      | 6.16 | 9.24     | 5.82   | 8.72  | 7.29      | 7.22 | 8.85     |
| (19) 4-methylphenol        |  | 7.07   | 7.18  | 6.03      | 5.85 | 8.55     | 7.37   | 9.24  | 7.65      | 5.99 | 8.69     |
| MAE (11 phenols)           |  | 5.75   | 5.89  | 5.22      | 4.73 | 7.38     | 4.75   | 6.58  | 5.43      | 5.27 | 6.83     |
| MSE (11 phenols)           |  | 5.54   | 5.84  | 4.87      | 4.56 | 7.38     | 4.19   | 6.58  | 5.06      | 5.06 | 6.83     |

<sup>a</sup> The calculated aqueous pK<sub>a</sub> values at 298.15 K are reported in Table S8.

**Table S10.** Calculated aqueous pK<sub>a</sub> values at 298.15 K and the mean absolute error (MAE) at several levels of theory using Reaction 3 (HRef=phenol) for direct calculations.

| <b>Solvent Method</b>                            | <b>SMD</b>    |              |                  |              |                 | <b>PCM</b>    |              |                  |              |                 |
|--------------------------------------------------|---------------|--------------|------------------|--------------|-----------------|---------------|--------------|------------------|--------------|-----------------|
| <b>Name</b>                                      | <b>M06-2X</b> | <b>B3LYP</b> | <b>BHandHLYP</b> | <b>PBE0</b>  | <b>TPSSTPSS</b> | <b>M06-2X</b> | <b>B3LYP</b> | <b>BHandHLYP</b> | <b>PBE0</b>  | <b>TPSSTPSS</b> |
| <b>(1)</b> 2,4-dinitrophenol                     | -0.95         | -1.06        | -1.30            | -0.19        | -0.62           | -2.48         | -2.33        | -3.01            | -1.46        | -1.85           |
| <b>(2)</b> 4-nitrosophenol                       | 2.48          | 1.21         | 1.86             |              | 1.08            | 0.36          | -0.96        | -0.16            |              | -1.26           |
| <b>(3)</b> 4-nitrophenol                         | 3.38          | 2.44         | 2.82             | 3.28         | 2.32            | 1.41          | 0.56         | 0.92             | 1.44         | 0.36            |
| <b>(4)</b> 2-nitrophenol                         | 3.87          | 4.06         | 3.16             | 4.63         | 4.68            | 3.79          | 3.99         | 4.03             | 4.86         | 4.77            |
| <b>(5)</b> 4-hydroxy-3-methoxybenzaldehyde       | 5.80          | 5.28         | 5.85             |              | 5.05            | 5.68          | 5.23         | 5.81             |              | 4.85            |
| <b>(6)</b> 2,3-dichlorophenol                    | 5.73          | 5.81         | 5.87             |              | 5.61            | 4.38          | 4.67         | 4.51             |              | 4.62            |
| <b>(7)</b> 3-cyanophenol                         | 7.57          | 7.57         | 7.71             | 7.55         | 7.43            | 6.15          | 6.17         | 6.32             | 6.17         | 5.97            |
| <b>(8)</b> 4-trifluoromethylphenol               | 6.99          | 7.38         | 7.78             |              | 7.12            | 7.17          | 5.62         | 5.56             |              | 5.59            |
| <b>(9)</b> 2-fluorophenol                        | 7.94          | 7.70         | 7.85             |              | 7.82            | 7.26          | 7.23         | 7.27             |              | 7.23            |
| <b>(10)</b> 3-hydroxybenzaldehyde                | 8.70          | 8.50         | 8.76             | 8.56         | 8.33            | 7.81          | 7.56         | 7.87             | 7.73         | 7.32            |
| <b>(11)</b> 3-chlorophenol                       | 8.18          | 8.14         | 8.20             |              | 8.07            | 7.24          | 7.27         | 7.30             |              | 7.12            |
| <b>(12)</b> 4-bromophenol                        | 8.70          | 8.77         | 8.71             | 8.66         | 8.74            | 7.83          | 7.96         | 7.88             | 7.86         | 7.84            |
| <b>(13)</b> acetaminophen                        | 9.77          | 9.49         | 9.92             | 9.85         | 9.45            | 9.88          | 10.42        | 9.43             |              | 9.78            |
| <b>(14)</b> 3-methoxyphenol                      | 9.84          | 10.01        | 9.82             | 9.83         | 10.10           | 9.56          | 9.79         | 9.54             | 9.63         | 9.86            |
| <b>(15)</b> 4-(2-aminoethyl)phenol               | 10.60         | 10.66        | 10.71            |              | 10.53           | 10.48         | 10.51        | 10.56            |              | 10.35           |
| <b>(16)</b> phenol                               | 9.80          | 9.63         | 9.82             | 9.81         | 9.54            | 10.08         | 9.85         | 10.10            | 10.01        | 9.78            |
| <b>(17)</b> 3-aminophenol                        | 10.41         | 10.60        | 10.31            |              | 10.69           | 10.57         | 10.84        | 10.49            |              | 10.93           |
| <b>(18)</b> 4-methoxyphenol                      | 10.76         | 11.30        | 11.10            | 10.99        | 11.44           | 10.50         | 11.14        | 10.96            | 11.20        | 11.09           |
| <b>(19)</b> 4-methylphenol                       | 10.69         | 10.47        | 10.42            | 10.62        | 10.16           | 11.32         | 11.32        | 11.32            | 10.22        | 10.88           |
| <b>(20)</b> 2-(tertbutyl)phenol                  | 11.36         | 11.80        | 11.67            |              | 11.51           | 10.99         | 11.17        | 11.29            |              | 10.81           |
| <b>MAE (20 phenols)</b>                          | <b>1.43</b>   | <b>1.61</b>  | <b>1.51</b>      | <b>1.34</b>  | <b>1.61</b>     | <b>2.01</b>   | <b>2.28</b>  | <b>2.15</b>      | <b>1.99</b>  | <b>2.23</b>     |
| <b>MAE (exc. NO, NO<sub>2</sub>)<sup>a</sup></b> | <b>0.78</b>   | <b>0.88</b>  | <b>0.74</b>      | <b>0.50</b>  | <b>0.94</b>     | <b>1.16</b>   | <b>1.38</b>  | <b>1.25</b>      | <b>0.90</b>  | <b>1.37</b>     |
| <b>MSE (20 phenols)</b>                          | <b>-1.06</b>  | <b>-1.16</b> | <b>-1.09</b>     | <b>-1.04</b> | <b>-1.19</b>    | <b>-1.64</b>  | <b>-1.74</b> | <b>-1.74</b>     | <b>-1.79</b> | <b>-1.84</b>    |

<sup>a</sup> Calculated excluding the results for the nitrophenols and nitrosophenol (1–4).



**Table S11.** Calculated aqueous pK<sub>a</sub> values at 298.15 K and the mean absolute error (MAE) at several levels of theory after using the corresponding pK<sub>a</sub> (exp) vs.  $\Delta G_{aq}^{\circ}$  (BA) correlation equation.

| Solvent Method                      |        | SMD   |           |       |          |  | PCM    |       |           |       |          |
|-------------------------------------|--------|-------|-----------|-------|----------|--|--------|-------|-----------|-------|----------|
| Name                                | M06-2X | B3LYP | BHandHLYP | PBE0  | TPSSTPSS |  | M06-2X | B3LYP | BHandHLYP | PBE0  | TPSSTPSS |
| (1) 2,4-dinitrophenol               | 4.53   | 4.83  | 4.66      | 4.62  | 4.98     |  | 4.79   | 5.18  | 4.80      | 4.82  | 5.34     |
| (2) 4-nitrosophenol                 | 6.18   | 5.84  | 6.09      |       | 5.75     |  | 5.94   | 5.70  | 5.91      |       | 5.57     |
| (3) 4-nitrophenol                   | 6.61   | 6.39  | 6.52      | 6.40  | 6.31     |  | 6.37   | 6.27  | 6.33      | 6.14  | 6.18     |
| (4) 2-nitrophenol                   | 6.85   | 7.11  | 6.67      | 7.09  | 7.38     |  | 7.34   | 7.55  | 7.54      | 7.69  | 7.86     |
| (5) 4-hydroxy-3-methoxybenzaldehyde | 7.78   | 7.65  | 7.89      |       | 7.55     |  | 8.11   | 8.02  | 8.23      |       | 7.89     |
| (6) 2,3-dichlorophenol              | 7.75   | 7.88  | 7.90      |       | 7.80     |  | 7.58   | 7.81  | 7.72      |       | 7.80     |
| (7) 3-cyanophenol                   | 8.63   | 8.67  | 8.72      | 8.59  | 8.62     |  | 8.31   | 8.37  | 8.43      | 8.28  | 8.31     |
| (8) 4-trifluoromethylphenol         | 8.36   | 8.59  | 8.76      |       | 8.48     |  | 8.72   | 8.17  | 8.13      |       | 8.17     |
| (9) 2-fluorophenol                  | 8.81   | 8.73  | 8.79      |       | 8.80     |  | 8.76   | 8.77  | 8.80      |       | 8.79     |
| (10) 3-hydroxybenzaldehyde          | 9.18   | 9.08  | 9.20      | 9.11  | 9.03     |  | 8.98   | 8.89  | 9.03      | 9.00  | 8.83     |
| (11) 3-chlorophenol                 | 8.93   | 8.93  | 8.95      |       | 8.91     |  | 8.75   | 8.79  | 8.81      |       | 8.75     |
| (12) 4-bromophenol                  | 9.18   | 9.21  | 9.17      | 9.16  | 9.22     |  | 8.99   | 9.04  | 9.03      | 9.05  | 9.03     |
| (13) acetaminophen                  | 9.70   | 9.52  | 9.72      | 9.77  | 9.54     |  | 9.82   | 9.97  | 9.63      |       | 9.77     |
| (14) 3-methoxyphenol                | 9.73   | 9.76  | 9.68      | 9.76  | 9.83     |  | 9.70   | 9.73  | 9.67      | 9.86  | 9.80     |
| (15) 4-(2-aminoethyl)phenol         | 10.09  | 10.05 | 10.08     |       | 10.03    |  | 10.07  | 10.00 | 10.07     |       | 9.98     |
| (16) phenol                         | 9.80   | 9.75  | 9.75      | 9.84  | 9.78     |  | 9.87   | 9.81  | 9.85      | 10.02 | 9.85     |
| (17) 3-aminophenol                  | 10.01  | 10.02 | 9.90      |       | 10.10    |  | 10.11  | 10.12 | 10.05     |       | 10.20    |
| (18) 4-methoxyphenol                | 10.17  | 10.33 | 10.25     | 10.35 | 10.44    |  | 10.08  | 10.24 | 10.23     | 10.57 | 10.26    |
| (19) 4-methylphenol                 | 10.14  | 9.96  | 9.94      | 10.17 | 9.86     |  | 10.41  | 10.31 | 10.37     | 10.13 | 10.18    |
| (20) 2-(tertbutyl)phenol            | 10.46  | 10.55 | 10.51     |       | 10.47    |  | 10.28  | 10.25 | 10.36     |       | 10.16    |
| MAE (20 phenols)                    | 0.22   | 0.24  | 0.25      | 0.22  | 0.27     |  | 0.28   | 0.34  | 0.30      | 0.36  | 0.40     |

**Table S12.** Predicted aqueous pK<sub>a</sub> values for the phenols in the test set (**21-30**) using the corresponding pK<sub>a</sub>(<sub>exp</sub>) *vs.*  $\Delta G_{aq}^{\circ}(BA)$  correlation equation listed in Table 4 (obtained from a training set of 20 phenols) at several levels of theory at 298.15 K.

| Solvation method                                         |  | SMD    |       |           |       | PCM    |       |           |       | Other Predictions    |                      |
|----------------------------------------------------------|--|--------|-------|-----------|-------|--------|-------|-----------|-------|----------------------|----------------------|
| Functional                                               |  | M06-2X | B3LYP | BHandHLYP | TPSS  | M06-2X | B3LYP | BHandHLYP | TPSS  | Ref. 39 <sup>a</sup> | Ref. 32 <sup>b</sup> |
| (21) 2-bromophenol                                       |  | 8.94   | 9.01  | 9.03      | 8.93  | 8.33   | 8.51  | 8.41      | 8.53  | 8.94                 |                      |
| (22) 2-chlorophenol                                      |  | 8.42   | 8.50  | 8.47      | 8.45  | 8.45   | 8.56  | 8.49      | 7.87  | 8.46                 | DNC <sup>c</sup>     |
| (23) 4-(methylthio)phenol                                |  | 9.40   | 9.39  | 9.52      | 9.80  | 9.19   | 9.19  | 9.18      | 8.56  | 9.34                 |                      |
| (24) 4-aminophenol                                       |  | 10.65  | 10.63 | 10.63     | 10.60 | 10.72  | 10.69 | 10.76     | 10.71 | 10.47                | 10.73 <sup>d</sup>   |
| (25) ketobemidone                                        |  | 9.79   | 10.12 | 9.89      | 10.08 | 9.94   | 10.94 | 11.08     | 10.92 | 9.70                 |                      |
| (26) profadol                                            |  | 10.03  | 10.08 | 10.01     | 10.05 | 10.22  | 10.27 | 10.31     | 10.26 | 9.91                 |                      |
| (27) tapentadol                                          |  | 10.09  | 10.16 | 10.13     | 10.14 | 10.09  | 10.08 | 10.10     | 10.12 | 9.97                 |                      |
| (28) (R)-Trolox                                          |  | 11.52  | 11.11 | 11.55     | 11.33 | 11.74  | 12.00 | 12.01     | 12.00 | 11.25                | 11.45                |
| (29) $\Delta^9$ -tetrahydrocannabinol ( $\Delta^9$ -THC) |  | 9.77   | 10.14 | 9.94      | 10.03 | 10.10  | 10.20 | 10.17     | 10.19 | 9.69                 | 9.23                 |
| (30) cannabidiol (CBD) <sup>c,e</sup>                    |  | 9.62   | 9.99  | 9.88      | 9.88  | 10.00  | 9.96  | 9.99      | 9.96  | 9.52                 |                      |
| (4) 2-nitrophenol                                        |  | 6.85   | 7.11  | 6.67      | 7.38  | 7.34   | 7.55  | 7.54      | 7.86  | 6.13                 | 3.92                 |

<sup>a</sup> Predicted pK<sub>a</sub> values using the correlation equation at the M06-2X(SMD) level of theory; <sup>b</sup> Predicted pK<sub>a</sub> values using the three-water clusters for the acid and the conjugate base as done in Ref. 32; <sup>c</sup> Waters would not equilibrate; <sup>d</sup> Value taken from Ref. 32; <sup>e</sup> Macroscopic pK<sub>a</sub> values have been calculated by accounting for the degenerate deprotonation sites.

**Table S13.** Predicted aqueous pK<sub>a</sub> values for molecules **25**, **26**, **29-50** at levels of theory not shown in Table 6.

| Solvation method                                                |        | SMD   |           |        |         |
|-----------------------------------------------------------------|--------|-------|-----------|--------|---------|
| Functional                                                      | M06-2X | B3LYP | BHandHLYP | Spread | Average |
| (25) ketobemidone                                               | 9.75   | 10.09 | 9.82      | 0.34   | 9.89    |
| (26) profadol                                                   | 9.97   | 10.04 | 9.93      | 0.11   | 9.98    |
| <b>Antioxidants</b>                                             |        |       |           |        |         |
| (31) o-butylated hydroxyanisole                                 | 10.89  | 10.94 | 10.52     | 0.42   | 10.78   |
| (32) m-butylated hydroxyanisole                                 | 10.55  | 10.52 | 10.41     | 0.14   | 10.49   |
| (33) tocol                                                      | 10.43  | 10.43 | 10.35     | 0.08   | 10.40   |
| (34) delta-tocopherol                                           | 10.54  | 10.58 | 10.48     | 0.10   | 10.53   |
| (35) beta-tocopherol                                            | 10.79  | 10.88 | 10.74     | 0.14   | 10.80   |
| (36) gamma-tocopherol                                           | 10.87  | 11.07 | 10.55     | 0.52   | 10.83   |
| (37) alpha-tocopherol                                           | 10.94  | 11.12 | 10.99     | 0.18   | 11.02   |
| (38) N,N-dimethyl-p-aminophenol                                 | 10.52  | 10.66 | 10.40     | 0.26   | 10.53   |
| (39) 6-hydroxy-5,7,8-trimethyl-1,2,3,4-tetrahydroquinoline      | 11.23  | 11.47 | 11.18     | 0.29   | 11.29   |
| (40) 9-hydroxyjulolidine                                        | 10.81  | 10.86 | 10.74     | 0.12   | 10.80   |
| (41) 4-butadienylphenol                                         | 9.25   | 9.17  | 9.22      | 0.08   | 9.21    |
| (42) 4-hydroxystilbene                                          | 9.60   | 9.42  | 9.47      | 0.18   | 9.50    |
| <b>Cannabinoids</b>                                             |        |       |           |        |         |
| (29) Δ <sup>9</sup> -tetrahydrocannabinol (Δ <sup>9</sup> -THC) | 9.74   | 10.10 | 9.87      | 0.36   | 9.90    |
| (30) cannabidiol (CBD) <sup>a</sup>                             | 9.57   | 9.94  | 9.79      | 0.37   | 9.77    |
| (43) Δ <sup>8</sup> -tetrahydrocannabinol (Δ <sup>8</sup> -THC) | 10.03  | 10.27 | 10.37     | 0.34   | 10.22   |
| (44) iso-tetrahydrocannabinol (iso-THC)                         | 9.91   | 10.14 | 10.03     | 0.23   | 10.03   |
| (45) Δ <sup>9</sup> -tetrahydrocannabivarin (THCV)              | 9.75   | 10.04 | 9.93      | 0.29   | 9.91    |
| (46) 3-homotetrahydrocannabinol                                 | 9.75   | 10.10 | 10.03     | 0.35   | 9.96    |
| (47) nabilone                                                   | 9.85   | 10.14 | 10.02     | 0.29   | 10.00   |
| (48) cannabinol (CBN)                                           | 8.80   | 9.49  | 9.40      | 0.69   | 9.23    |
| (49) cannabichromene (CBC)                                      | 8.83   | 9.17  | 8.95      | 0.34   | 8.98    |
| (50) cannabigerol (CBG) <sup>a</sup>                            | 9.57   | 9.54  | 9.37      | 0.17   | 9.49    |

<sup>a</sup> Macroscopic pK<sub>a</sub> values have been calculated by accounting for the degenerate deprotonation sites.

Cartesian coordinates of the optimized acids and conjugate bases for the phenols with experimental pK<sub>a</sub> values studied at the M06-2X(SMD)/6-311++G(d,p) level of theory in water at 298.15 K.

### 2,4-dinitrophenol

Charge=0, Multiplicity=1

|   |             |             |             |
|---|-------------|-------------|-------------|
| C | 1.21275100  | 1.53999600  | -0.00061800 |
| C | 1.37493300  | 0.15137100  | -0.00000200 |
| C | 0.30360600  | -0.71087900 | 0.00034800  |
| C | -0.97434600 | -0.16671300 | 0.00083300  |
| C | -1.18598100 | 1.22856000  | -0.00009700 |
| C | -0.05672300 | 2.06357400  | -0.00047000 |
| H | 2.07717700  | 2.19044500  | -0.00102600 |
| H | 0.44098200  | -1.78340500 | 0.00046500  |
| H | -0.22055200 | 3.13341400  | -0.00117200 |
| O | -2.37358900 | 1.82435100  | -0.00022900 |
| H | -3.08154700 | 1.15368800  | -0.00187400 |
| N | 2.72285500  | -0.40974700 | -0.00023700 |
| O | 3.66159100  | 0.36312900  | 0.00363300  |
| O | 2.84526700  | -1.61955300 | -0.00418200 |
| N | -2.09183200 | -1.09558100 | 0.00078200  |
| O | -3.22722900 | -0.63250800 | -0.00142100 |
| O | -1.86587200 | -2.28445800 | 0.00217700  |

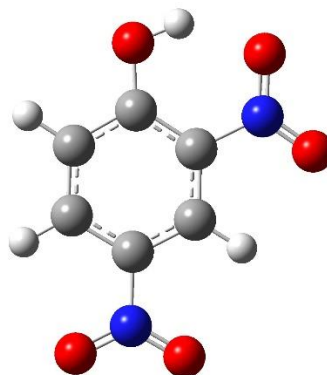

### 2,4-dinitrophenol anion

Charge=-1, Multiplicity=1

|   |             |             |             |
|---|-------------|-------------|-------------|
| C | -1.21107200 | 1.54843500  | -0.02928500 |
| C | -1.35082700 | 0.13994800  | -0.00019200 |
| C | -0.24470300 | -0.68531900 | 0.00552300  |
| C | 1.02099100  | -0.12236400 | -0.00190600 |
| C | 1.25051500  | 1.31304300  | -0.03955300 |
| C | 0.03132300  | 2.09846100  | -0.05283800 |
| H | -2.09391100 | 2.17452700  | -0.03314400 |
| H | -0.35767600 | -1.76057100 | 0.03279000  |
| H | 0.15741300  | 3.17421600  | -0.08039000 |
| O | 2.37056500  | 1.86437100  | -0.08622100 |
| N | -2.65566300 | -0.44476600 | 0.03544100  |
| O | -3.63072300 | 0.29849400  | 0.03582700  |
| O | -2.76562500 | -1.66576100 | 0.06245400  |
| N | 2.12587600  | -1.04501000 | 0.01340500  |
| O | 3.22481400  | -0.65550100 | 0.37676400  |
| O | 1.92913400  | -2.20572500 | -0.33278400 |

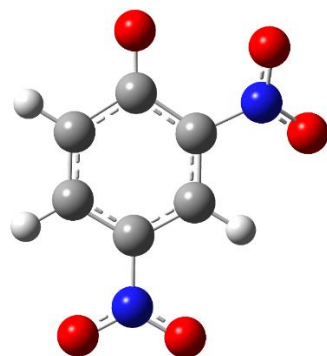

### 2,4-dinitrophenol anion-H<sub>2</sub>O

Charge=-1, Multiplicity=1

|   |             |             |             |
|---|-------------|-------------|-------------|
| C | -1.52680700 | -1.58455500 | -0.05288200 |
| C | -1.77671300 | -0.19570900 | 0.02319400  |
| C | -0.74561700 | 0.71938200  | -0.04014700 |
| C | 0.55220100  | 0.26061100  | -0.19264800 |
| C | 0.89337000  | -1.14604600 | -0.24936000 |
| C | -0.24753200 | -2.03046400 | -0.18115800 |
| H | -2.35351100 | -2.28148200 | -0.00580900 |
| H | -0.94285700 | 1.78181700  | 0.00736300  |
| H | -0.03567200 | -3.09169700 | -0.23161000 |
| O | 2.05968600  | -1.60596400 | -0.31966100 |
| N | -3.12258000 | 0.27907800  | 0.15410800  |
| O | -4.03014300 | -0.54219500 | 0.20324100  |
| O | -3.32760500 | 1.48543300  | 0.21506600  |
| N | 1.57724500  | 1.27193900  | -0.28395300 |
| O | 2.63080600  | 1.00034400  | -0.83770700 |
| O | 1.35185400  | 2.38050700  | 0.18561100  |
| O | 4.24252600  | -0.57603400 | 1.05248200  |
| H | 4.35995400  | 0.33967400  | 0.77822500  |
| H | 3.47902200  | -0.88147100 | 0.52650000  |

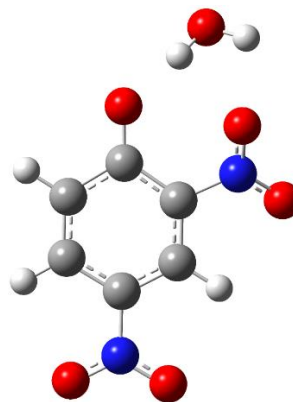

### 4-nitrosophenol

Charge=0, Multiplicity=1

|   |             |             |             |
|---|-------------|-------------|-------------|
| C | -0.18974600 | 1.34641600  | 0.00000200  |
| C | -1.02048600 | 0.22408000  | 0.00002400  |
| C | -0.47995100 | -1.07110200 | 0.00003200  |
| C | 0.88643900  | -1.23203100 | 0.00001100  |
| C | 1.71927500  | -0.10019000 | -0.00000800 |
| C | 1.18432200  | 1.19019900  | 0.00000200  |
| H | -0.63625400 | 2.33434300  | -0.00000300 |
| H | -1.13783400 | -1.93140100 | 0.00003800  |
| H | 1.33995500  | -2.21569200 | 0.00000600  |
| H | 1.84835800  | 2.04693200  | -0.00000300 |
| O | 3.05171200  | -0.32339700 | -0.00001900 |
| H | 3.53600900  | 0.51368300  | -0.00003400 |
| N | -2.40662300 | 0.49581700  | 0.00002600  |
| O | -3.13958700 | -0.47195500 | -0.00005200 |

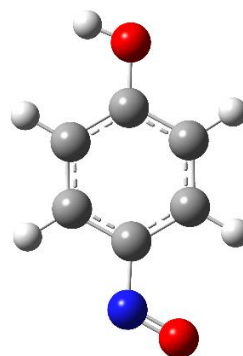

#### 4-nitrosophenol anion

Charge=-1, Multiplicity=1

|   |             |             |             |
|---|-------------|-------------|-------------|
| C | -0.12260500 | 1.35693100  | -0.00000500 |
| C | -0.98789800 | 0.23073300  | 0.00000100  |
| C | -0.42122400 | -1.07696100 | 0.00000600  |
| C | 0.92912900  | -1.24030200 | 0.00000400  |
| C | 1.83532800  | -0.10559000 | -0.00000200 |
| C | 1.23288100  | 1.20693400  | -0.00000600 |
| H | -0.57277700 | 2.34482900  | -0.00000800 |
| H | -1.08143700 | -1.93657500 | 0.00001000  |
| H | 1.37330200  | -2.22998000 | 0.00000800  |
| H | 1.89451600  | 2.06595700  | -0.00001000 |
| O | 3.08587800  | -0.26678500 | -0.00000200 |
| N | -2.32177200 | 0.49585400  | 0.00000200  |
| O | -3.10523700 | -0.47642500 | 0.00000200  |

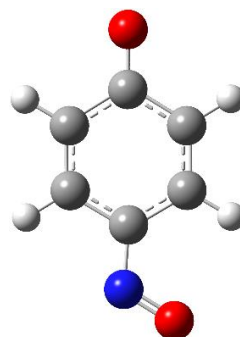

#### 4-nitrophenol

Charge=0, Multiplicity=1

|   |             |             |             |
|---|-------------|-------------|-------------|
| C | -0.01659400 | 1.22347700  | -0.00004700 |
| C | -0.68282800 | 0.00036100  | 0.00000200  |
| C | -0.00256300 | -1.21280300 | 0.00003700  |
| C | 1.38013700  | -1.20217800 | 0.00004300  |
| C | 2.06234200  | 0.01792500  | 0.00001100  |
| C | 1.36402900  | 1.22959300  | 0.00000800  |
| H | -0.57334500 | 2.15065400  | -0.00000500 |
| H | -0.54647400 | -2.14762200 | -0.00002600 |
| H | 1.94055100  | -2.12986100 | 0.00017200  |
| H | 1.91717200  | 2.16022800  | -0.00003800 |
| O | 3.41367900  | 0.08527000  | -0.00010000 |
| H | 3.79774100  | -0.80176800 | 0.00046800  |
| N | -2.13664900 | -0.00854800 | -0.00002700 |
| O | -2.72607100 | 1.05908100  | 0.00010600  |
| O | -2.71338800 | -1.08310700 | -0.00009400 |

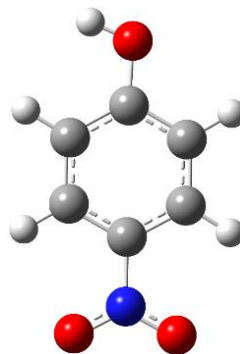

#### 4-nitrophenol anion

Charge=-1, Multiplicity=1

|   |             |             |             |
|---|-------------|-------------|-------------|
| C | -0.04777500 | -1.22271200 | -0.00005900 |
| C | 0.65220900  | -0.00006200 | -0.00009200 |
| C | -0.04781800 | 1.22269500  | -0.00003000 |
| C | -1.41565700 | 1.22400800  | 0.00002700  |
| C | -2.17655500 | -0.00013600 | 0.00001800  |
| C | -1.41571200 | -1.22418300 | -0.00000300 |
| H | 0.50345400  | -2.15437700 | -0.00006300 |

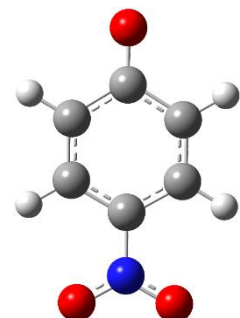

|   |             |             |             |
|---|-------------|-------------|-------------|
| H | 0.50340600  | 2.15436000  | -0.00000800 |
| H | -1.96319000 | 2.15975700  | 0.00009900  |
| H | -1.96288700 | -2.16013000 | 0.00004500  |
| O | -3.44394900 | 0.00017400  | 0.00009200  |
| N | 2.06113000  | 0.00001500  | -0.00023500 |
| O | 2.67202600  | -1.07464800 | 0.00009800  |
| O | 2.67181800  | 1.07480200  | 0.00011200  |

#### 4-nitrophenol anion-H<sub>2</sub>O

Charge=-1, Multiplicity=1

|   |             |             |             |
|---|-------------|-------------|-------------|
| C | 0.31522700  | -1.04095900 | -0.01830200 |
| C | 1.27124000  | -0.01015200 | -0.00008200 |
| C | 0.87082300  | 1.33769400  | 0.00821700  |
| C | -0.46298500 | 1.64968400  | -0.00141000 |
| C | -1.47435000 | 0.63129800  | -0.01990500 |
| C | -1.01907900 | -0.73036600 | -0.02827900 |
| H | 0.63964100  | -2.07360300 | -0.02474700 |
| H | 1.61904600  | 2.11987100  | 0.02198300  |
| H | -0.78439400 | 2.68484600  | 0.00461700  |
| H | -1.76344500 | -1.51836800 | -0.04301000 |
| O | -2.71578600 | 0.92656300  | -0.02994500 |
| N | 2.64922200  | -0.33259700 | 0.00948400  |
| O | 2.99439700  | -1.51672100 | 0.00250100  |
| O | 3.48477900  | 0.57482200  | 0.02460700  |
| O | -4.53485200 | -1.07876200 | -0.02754600 |
| H | -3.86828700 | -0.35357400 | -0.01119200 |
| H | -5.22067300 | -0.80141200 | 0.58758900  |

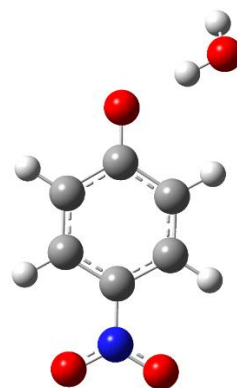

#### 2-nitrophenol

Charge=0, Multiplicity=1

|   |             |             |             |
|---|-------------|-------------|-------------|
| C | -2.54195900 | -0.18055500 | 0.00002000  |
| C | -1.88843200 | -1.42008200 | 0.00011000  |
| C | -0.51223000 | -1.45665000 | 0.00010900  |
| C | 0.21539200  | -0.26093100 | 0.00003200  |
| C | -0.42797600 | 0.99103500  | -0.00004100 |
| C | -1.82737400 | 1.00018500  | -0.00005400 |
| H | -3.62480400 | -0.14252600 | 0.00001800  |
| H | -2.45578200 | -2.34113500 | 0.00018100  |
| H | 0.02478300  | -2.39533500 | 0.00017700  |
| H | -2.32402900 | 1.96263000  | -0.00011600 |
| O | 0.18987700  | 2.18349700  | -0.00010400 |
| H | 1.15346200  | 2.04719400  | 0.00005600  |
| N | 1.65921700  | -0.35604600 | 0.00001500  |

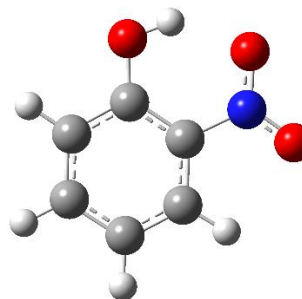

|   |            |             |             |
|---|------------|-------------|-------------|
| O | 2.31718100 | 0.68334900  | 0.00011800  |
| O | 2.18135900 | -1.45141200 | -0.00019900 |

### 2-nitrophenol anion

Charge=-1, Multiplicity=1

|   |             |             |             |
|---|-------------|-------------|-------------|
| C | -2.52288400 | -0.24791000 | 0.00974900  |
| C | -1.80386200 | -1.46978000 | 0.02717800  |
| C | -0.43712300 | -1.42996200 | 0.02135700  |
| C | 0.25539800  | -0.19639500 | 0.00709400  |
| C | -0.43403100 | 1.07433800  | -0.01818600 |
| C | -1.87424900 | 0.95347600  | -0.01305700 |
| H | -3.60770600 | -0.26790800 | 0.01563700  |
| H | -2.32668800 | -2.41689700 | 0.04883500  |
| H | 0.14032200  | -2.34425700 | 0.03837100  |
| H | -2.42865900 | 1.88550500  | -0.02841700 |
| O | 0.10578300  | 2.21630400  | -0.05418500 |
| N | 1.67282000  | -0.26384500 | 0.00580300  |
| O | 2.34480700  | 0.76081200  | 0.11930900  |
| O | 2.22609700  | -1.36613100 | -0.10510600 |

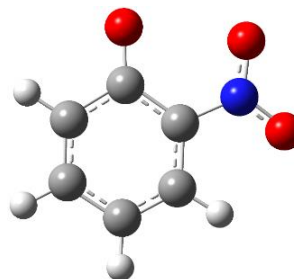

### 2-nitrophenol anion-H<sub>2</sub>O

Charge=-1, Multiplicity=1

|   |             |             |             |
|---|-------------|-------------|-------------|
| C | 2.73836000  | -0.73669500 | 0.16150100  |
| C | 2.62261100  | 0.65708700  | 0.37188900  |
| C | 1.39196500  | 1.24373700  | 0.24018900  |
| C | 0.26109300  | 0.47661800  | -0.11207600 |
| C | 0.32788100  | -0.94673800 | -0.31600500 |
| C | 1.64813300  | -1.49705600 | -0.16441000 |
| H | 3.70813100  | -1.21271400 | 0.26090100  |
| H | 3.49064900  | 1.25144500  | 0.62494800  |
| H | 1.26999800  | 2.30898800  | 0.38355300  |
| H | 1.74028300  | -2.56672200 | -0.31694800 |
| O | -0.65583500 | -1.70938500 | -0.58114900 |
| N | -0.97077300 | 1.18444300  | -0.25082900 |
| O | -1.92890600 | 0.65134300  | -0.80433000 |
| O | -1.05049700 | 2.33763200  | 0.17979800  |
| O | -2.86694000 | -1.42904600 | 1.01672400  |
| H | -3.23850500 | -0.56333800 | 0.81609600  |
| H | -2.09798600 | -1.49482700 | 0.41237700  |

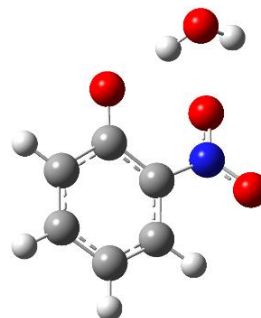



#### 4-hydroxy-3-methoxybenzaldehyde

Charge=0, Multiplicity=1

|   |             |             |             |
|---|-------------|-------------|-------------|
| C | 1.41128200  | -0.17268800 | -0.00011300 |
| C | 0.20200000  | -0.88415100 | -0.00012600 |
| C | -0.99730800 | -0.19503200 | -0.00007000 |
| C | -0.98812100 | 1.21220400  | 0.00000500  |
| C | 0.21174900  | 1.91299200  | 0.00001900  |
| C | 1.41413800  | 1.22181300  | -0.00003700 |
| H | 0.22146100  | -1.96783000 | -0.00018700 |
| H | 0.18071900  | 2.99595600  | 0.00007900  |
| H | 2.35445200  | 1.75973200  | -0.00002500 |
| O | -2.15700200 | 1.90102800  | 0.00006200  |
| H | -2.89807000 | 1.27729000  | 0.00009400  |
| O | -2.23888300 | -0.75291100 | -0.00009000 |
| C | 2.66374900  | -0.93653200 | -0.00019300 |
| H | 2.54853500  | -2.03351200 | 0.00015000  |
| O | 3.77578600  | -0.43905200 | 0.00022500  |
| C | -2.31548900 | -2.17727900 | 0.00013700  |
| H | -1.84146900 | -2.58620100 | 0.89527200  |
| H | -3.37524100 | -2.41943500 | 0.00024400  |
| H | -1.84159000 | -2.58648700 | -0.89493100 |

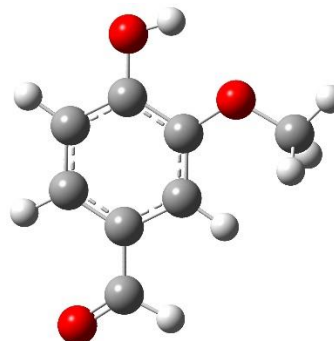

#### 4-hydroxy-3-methoxybenzaldehyde anion

Charge=-1, Multiplicity=1

|   |             |             |             |
|---|-------------|-------------|-------------|
| C | 1.38112800  | -0.18262800 | -0.00002000 |
| C | 0.13455000  | -0.85565800 | 0.00000200  |
| C | -1.04215500 | -0.14889000 | 0.00001000  |
| C | -1.05662300 | 1.29705700  | -0.00000600 |
| C | 0.22051500  | 1.93502500  | -0.00003400 |
| C | 1.39827400  | 1.22097400  | -0.00003900 |
| H | 0.13340600  | -1.94032200 | 0.00001500  |
| H | 0.22898600  | 3.01996400  | -0.00005000 |
| H | 2.35120700  | 1.73982500  | -0.00005800 |
| O | -2.15574800 | 1.94567400  | -0.00001300 |
| O | -2.29247700 | -0.71800800 | 0.00002900  |
| C | 2.59221400  | -0.96205700 | -0.00002500 |
| H | 2.44609800  | -2.05655700 | -0.00000800 |
| O | 3.73940700  | -0.51148300 | -0.00004600 |
| C | -2.35069300 | -2.13678900 | 0.00010600  |
| H | -1.87259600 | -2.54862900 | 0.89333100  |
| H | -3.40717500 | -2.39722600 | 0.00014900  |
| H | -1.87264700 | -2.54872700 | -0.89310000 |

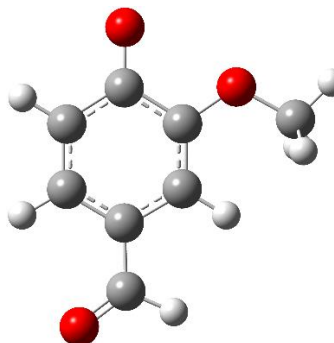

### 2,3-dichlorophenol

Charge=0, Multiplicity=1

|    |             |             |             |
|----|-------------|-------------|-------------|
| C  | -0.36186100 | 1.95730000  | 0.00000100  |
| C  | -0.75864200 | 0.62869300  | 0.00000000  |
| C  | 0.18271100  | -0.39987600 | 0.00000000  |
| C  | 1.54625100  | -0.08898800 | -0.00000100 |
| C  | 1.94599400  | 1.24450000  | 0.00000000  |
| C  | 0.99701700  | 2.25433300  | 0.00000000  |
| H  | -1.10838500 | 2.74059900  | 0.00000100  |
| H  | 3.00647600  | 1.46430100  | -0.00000100 |
| H  | 1.31575900  | 3.28913700  | 0.00000100  |
| O  | 2.51679900  | -1.03913500 | -0.00000100 |
| H  | 2.13796600  | -1.92890100 | -0.00000100 |
| Cl | -0.29557800 | -2.06919700 | -0.00000100 |
| Cl | -2.45707000 | 0.25579500  | 0.00000100  |

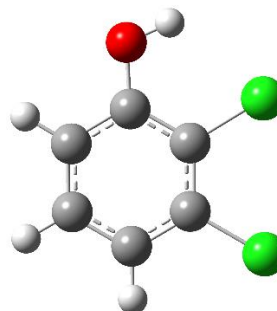

### 2,3-dichlorophenol anion

Charge=-1, Multiplicity=1

|    |             |             |             |
|----|-------------|-------------|-------------|
| C  | -0.17235400 | 1.96624600  | 0.00000100  |
| C  | -0.66252500 | 0.66626500  | 0.00000000  |
| C  | 0.18425200  | -0.43738600 | 0.00000000  |
| C  | 1.60971900  | -0.29278800 | -0.00000100 |
| C  | 2.07175700  | 1.05480900  | 0.00000000  |
| C  | 1.21205400  | 2.13772000  | 0.00000000  |
| H  | -0.85338500 | 2.80630700  | 0.00000100  |
| H  | 3.14598100  | 1.20637700  | -0.00000100 |
| H  | 1.61819900  | 3.14332700  | 0.00000100  |
| O  | 2.41308700  | -1.29620000 | -0.00000100 |
| Cl | -0.46232000 | -2.05753600 | 0.00000000  |
| Cl | -2.40079300 | 0.44838300  | 0.00000100  |

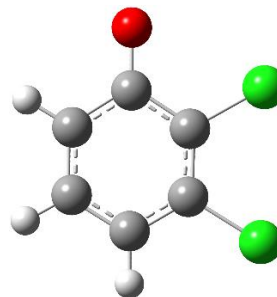

### 3-cyanophenol

Charge=0, Multiplicity=1

|   |             |             |             |
|---|-------------|-------------|-------------|
| C | -0.68742600 | 1.79909700  | -0.00005000 |
| C | 0.64517300  | 1.40878300  | 0.00009100  |
| C | 0.93813600  | 0.04261000  | 0.00016400  |
| C | -0.06673600 | -0.92479400 | 0.00012700  |
| C | -1.39275200 | -0.50722600 | 0.00000800  |
| C | -1.70483500 | 0.85150400  | -0.00007900 |
| H | -0.94006400 | 2.85220600  | -0.00013800 |
| H | 1.44594300  | 2.13680100  | 0.00016500  |
| H | 0.17302900  | -1.98088600 | 0.00018600  |
| H | -2.74593600 | 1.15659100  | -0.00021800 |

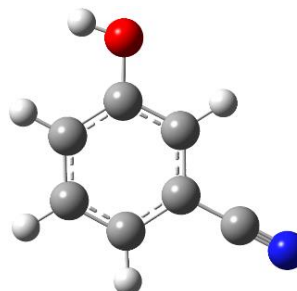

|   |             |             |             |
|---|-------------|-------------|-------------|
| O | -2.35386000 | -1.47731700 | -0.00008900 |
| H | -3.23285000 | -1.07583000 | 0.00030900  |
| C | 2.30932200  | -0.38036100 | -0.00001400 |
| N | 3.41221100  | -0.71543100 | -0.00015300 |

### 3-cyanophenol anion

Charge=-1, Multiplicity=1

|   |             |             |             |
|---|-------------|-------------|-------------|
| C | -0.77899800 | 1.75526600  | -0.00004900 |
| C | 0.57199700  | 1.41424000  | -0.00001000 |
| C | 0.88944800  | 0.05165100  | 0.00002100  |
| C | -0.08627900 | -0.94387100 | 0.00001400  |
| C | -1.46796900 | -0.61060600 | -0.00002500 |
| C | -1.76801200 | 0.78254900  | -0.00005700 |
| H | -1.06251400 | 2.80225000  | -0.00007500 |
| H | 1.35270000  | 2.16333300  | -0.00000400 |
| H | 0.20413100  | -1.98869700 | 0.00003900  |
| H | -2.81380800 | 1.07354700  | -0.00008800 |
| O | -2.39201000 | -1.51806400 | -0.00003300 |
| C | 2.27086800  | -0.33897800 | 0.00006100  |
| N | 3.38132000  | -0.65249000 | 0.00009400  |

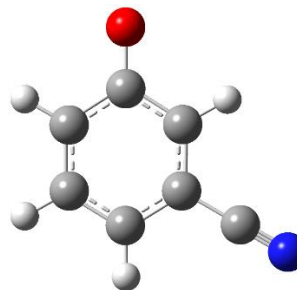

### 3-cyanophenol anion-H<sub>2</sub>O

Charge=-1, Multiplicity=1

|   |             |             |             |
|---|-------------|-------------|-------------|
| C | -0.07638700 | 1.86255600  | 0.00000200  |
| C | -1.38794100 | 1.39507500  | -0.00000100 |
| C | -1.57742200 | 0.00921300  | -0.00000100 |
| C | -0.51137600 | -0.88883600 | 0.00000100  |
| C | 0.82669400  | -0.42298900 | 0.00000500  |
| C | 1.00102000  | 0.98729000  | 0.00000500  |
| H | 0.10734000  | 2.93137200  | 0.00000300  |
| H | -2.23509200 | 2.06805900  | -0.00000200 |
| H | -0.69889700 | -1.95669600 | 0.00000100  |
| H | 2.01377200  | 1.37797800  | 0.00000800  |
| O | 1.83178800  | -1.25206900 | 0.00001100  |
| C | -2.91585200 | -0.50993400 | -0.00000400 |
| N | -3.99217700 | -0.92529100 | -0.00000500 |
| O | 4.29441000  | -0.31806800 | -0.00001000 |
| H | 3.34382900  | -0.61979400 | -0.00001000 |
| H | 4.25229200  | 0.64295700  | -0.00001700 |

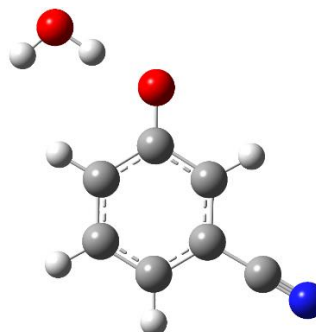

### 4-trifluoromethylphenol

Charge=0, Multiplicity=1

|   |             |             |             |
|---|-------------|-------------|-------------|
| C | -0.34620700 | 1.22085600  | 0.00003700  |
| C | -1.73509700 | 1.19956500  | 0.00000400  |
| C | -1.69416800 | -1.22409400 | 0.00001000  |
| C | -0.31064000 | -1.19715100 | 0.00003000  |
| C | 0.36254500  | 0.02521200  | 0.00005800  |
| H | 0.17602600  | 2.16951900  | 0.00005200  |
| H | -2.30376100 | 2.12278500  | -0.00001200 |
| H | -2.23596800 | -2.16196500 | 0.00000800  |
| H | 0.24815000  | -2.12668900 | 0.00004600  |
| C | 1.85502500  | 0.01369600  | 0.00000400  |
| F | 2.38806000  | 1.24450400  | 0.00082400  |
| F | 2.36299300  | -0.62595900 | 1.07429000  |
| F | 2.36294500  | -0.62448300 | -1.07519000 |
| C | -2.40463600 | -0.02212400 | -0.00000500 |
| O | -3.76498500 | -0.10346300 | -0.00002600 |
| H | -4.15147500 | 0.78174700  | -0.00004000 |

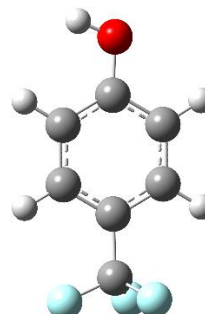

### 4-trifluoromethylphenol anion

Charge=-1, Multiplicity=1

|   |             |             |             |
|---|-------------|-------------|-------------|
| C | 0.39713000  | 1.22518000  | -0.00002700 |
| C | 1.78083700  | 1.21136300  | 0.00003400  |
| C | 1.75097100  | -1.20975300 | -0.00007300 |
| C | 0.37131500  | -1.18858800 | -0.00012900 |
| C | -0.32178300 | 0.02834400  | -0.00012700 |
| H | -0.12984500 | 2.17288600  | -0.00000400 |
| H | 2.33190200  | 2.14603900  | 0.00009900  |
| H | 2.28112700  | -2.15644700 | -0.00010000 |
| H | -0.18313400 | -2.12255700 | -0.00018900 |
| C | -1.80282700 | 0.00978300  | -0.00000900 |
| F | -2.34850500 | 1.23873000  | -0.00107000 |
| F | -2.32633000 | -0.63446000 | -1.07287800 |
| F | -2.32623300 | -0.63249500 | 1.07411000  |
| C | 2.52326300  | -0.00652600 | 0.00001600  |
| O | 3.81451600  | -0.02559000 | 0.00007700  |

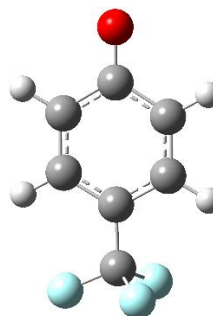

### 2-fluorophenol

Charge=0, Multiplicity=1

|   |             |             |             |
|---|-------------|-------------|-------------|
| C | 1.90315100  | -0.64262700 | 0.00000200  |
| C | 0.72025200  | -1.37877800 | 0.00000100  |
| C | -0.48029100 | -0.70095900 | 0.00000000  |
| C | -0.55621100 | 0.68805800  | -0.00000100 |
| C | 0.62911900  | 1.41344700  | 0.00000000  |
| C | 1.85176500  | 0.74829700  | 0.00000100  |
| H | 2.85527100  | -1.15775400 | 0.00000300  |
| H | 0.71617500  | -2.46217000 | 0.00000200  |
| H | 0.57554700  | 2.49577600  | -0.00000100 |
| H | 2.76821800  | 1.32565100  | 0.00000100  |
| O | -1.75058200 | 1.34911700  | -0.00000200 |
| H | -2.48372200 | 0.71901000  | -0.00000300 |
| F | -1.64817200 | -1.38645300 | 0.00000000  |

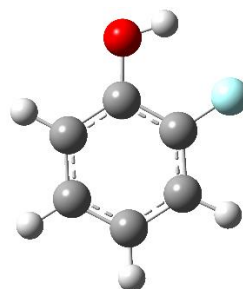

### 2-fluorophenol anion

Charge=-1, Multiplicity=1

|   |             |             |             |
|---|-------------|-------------|-------------|
| C | 1.83718700  | -0.73491000 | 0.00000100  |
| C | 0.60080500  | -1.38709200 | 0.00000100  |
| C | -0.55564000 | -0.64100400 | 0.00000000  |
| C | -0.60722500 | 0.77745300  | -0.00000200 |
| C | 0.67122700  | 1.39251100  | -0.00000100 |
| C | 1.85403700  | 0.65825500  | 0.00000100  |
| H | 2.75591800  | -1.30757600 | 0.00000300  |
| H | 0.52702600  | -2.46934500 | 0.00000200  |
| H | 0.70176500  | 2.47782500  | -0.00000100 |
| H | 2.80265800  | 1.18479100  | 0.00000100  |
| O | -1.73006100 | 1.42888000  | -0.00000200 |
| F | -1.74991300 | -1.30089000 | 0.00000000  |

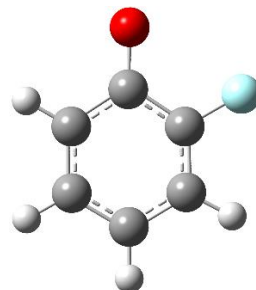

### 3-hydroxybenzaldehyde

Charge=0, Multiplicity=1

|   |             |             |             |
|---|-------------|-------------|-------------|
| C | 0.95397500  | 1.79644300  | 0.00004600  |
| C | -0.41914300 | 1.57217900  | 0.00016400  |
| C | -0.89509900 | 0.26124800  | -0.00009600 |
| C | -0.01781100 | -0.82424700 | -0.00014700 |
| C | 1.34854900  | -0.58572100 | 0.00011200  |
| C | 1.83728200  | 0.72416600  | -0.00012100 |
| H | 1.34263300  | 2.80747300  | 0.00003500  |
| H | -1.11895900 | 2.40045500  | 0.00035200  |
| H | -0.39353800 | -1.84101600 | -0.00033300 |
| H | 2.90993000  | 0.88911600  | -0.00033400 |

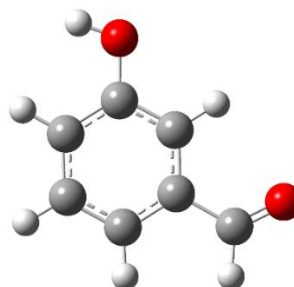

|   |             |             |             |
|---|-------------|-------------|-------------|
| C | -2.35470700 | 0.04327100  | -0.00017600 |
| H | -2.96796300 | 0.95902200  | -0.00040200 |
| O | -2.88270100 | -1.05097500 | 0.00016600  |
| O | 2.18343300  | -1.66927100 | 0.00009200  |
| H | 3.10377300  | -1.37711300 | -0.00007300 |

### 3-hydroxybenzaldehyde anion

Charge=-1, Multiplicity=1

|   |             |             |             |
|---|-------------|-------------|-------------|
| C | -1.04466200 | 1.73631000  | -0.00006300 |
| C | 0.33956800  | 1.56408900  | -0.00009600 |
| C | 0.84239900  | 0.25991200  | -0.00004900 |
| C | -0.00202600 | -0.85119900 | -0.00000100 |
| C | -1.41169000 | -0.70482200 | -0.00001200 |
| C | -1.89338500 | 0.63998700  | -0.00001400 |
| H | -1.46556100 | 2.73618000  | -0.00008200 |
| H | 1.01607500  | 2.41126800  | -0.00013600 |
| H | 0.42296600  | -1.85012200 | 0.00003900  |
| H | -2.96919500 | 0.78810000  | 0.00001700  |
| C | 2.30495900  | 0.09524200  | -0.00007800 |
| H | 2.88361600  | 1.03458800  | 0.00006700  |
| O | 2.88610600  | -0.97553600 | 0.00013700  |
| O | -2.22346700 | -1.71910400 | 0.00010900  |

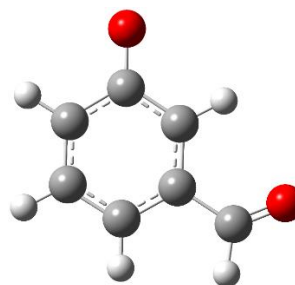

### 3-hydroxybenzaldehyde anion-H<sub>2</sub>O

Charge=-1, Multiplicity=1

|   |             |             |             |
|---|-------------|-------------|-------------|
| C | 1.14040200  | -2.15154000 | -0.15019000 |
| C | 1.91207200  | -0.98987400 | -0.15241300 |
| C | 1.26223600  | 0.23736500  | -0.00192500 |
| C | -0.12296700 | 0.31680400  | 0.14923700  |
| C | -0.92412700 | -0.84728000 | 0.15200600  |
| C | -0.23704200 | -2.08430200 | -0.00366700 |
| H | 1.61794400  | -3.11862000 | -0.26470600 |
| H | 2.98953500  | -1.02671400 | -0.26715500 |
| H | -0.59512000 | 1.28654200  | 0.27135300  |
| H | -0.82933800 | -2.99406000 | -0.00377000 |
| C | 2.08926500  | 1.45542500  | -0.00402400 |
| H | 3.17329400  | 1.28830700  | -0.12298300 |
| O | 1.65799600  | 2.58839900  | 0.11257400  |
| O | -2.22238800 | -0.80410600 | 0.29107200  |
| O | -3.36418700 | 1.48142500  | -0.32607700 |
| H | -2.74723000 | 2.18363700  | -0.09852400 |
| H | -2.89948500 | 0.63557400  | -0.06891100 |

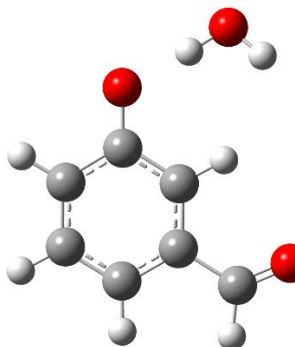

### 3-chlorophenol

Charge=0, Multiplicity=1

|    |             |             |             |
|----|-------------|-------------|-------------|
| C  | -0.56400100 | 1.41704800  | -0.00000800 |
| C  | -0.82612800 | 0.05470000  | -0.00001100 |
| C  | 0.18236300  | -0.89840200 | 0.00000500  |
| C  | 1.50541900  | -0.45997500 | -0.00000600 |
| C  | 1.80375500  | 0.90107100  | -0.00000300 |
| C  | 0.76772700  | 1.82554300  | 0.00000700  |
| H  | -1.37338300 | 2.13513200  | -0.00000400 |
| H  | -0.04578600 | -1.95803100 | 0.00001700  |
| H  | 2.83961300  | 1.21718900  | 0.00000700  |
| H  | 0.99751900  | 2.88440200  | 0.00000800  |
| O  | 2.55524900  | -1.33549600 | 0.00001200  |
| H  | 2.23566000  | -2.24689900 | -0.00008000 |
| Cl | -2.48884800 | -0.49339600 | 0.00000300  |

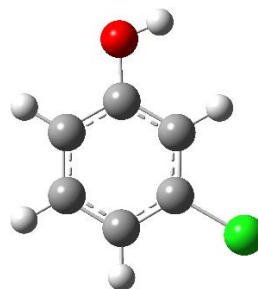

### 3-chlorophenol anion

Charge=-1, Multiplicity=1

|    |             |             |             |
|----|-------------|-------------|-------------|
| C  | -0.49140400 | 1.41465100  | -0.00000200 |
| C  | -0.77936700 | 0.05540500  | -0.00000100 |
| C  | 0.19227100  | -0.92880800 | 0.00000300  |
| C  | 1.57422000  | -0.57967600 | 0.00001000  |
| C  | 1.86534200  | 0.81516300  | 0.00000300  |
| C  | 0.86056000  | 1.76931600  | -0.00000200 |
| H  | -1.27845800 | 2.15669500  | -0.00000600 |
| H  | -0.08508600 | -1.97673000 | 0.00000200  |
| H  | 2.90721700  | 1.11876500  | 0.00000100  |
| H  | 1.12503800  | 2.82166000  | -0.00000400 |
| O  | 2.50307400  | -1.48410500 | 0.00000400  |
| Cl | -2.47194300 | -0.44257900 | -0.00000500 |

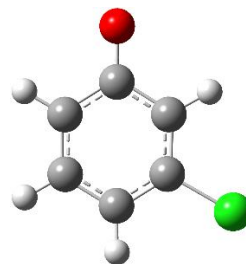

### 4-bromophenol

Charge=0, Multiplicity=1

|   |             |             |             |
|---|-------------|-------------|-------------|
| C | 0.36657500  | 1.21648500  | -0.00000300 |
| C | -0.30924700 | 0.00253000  | -0.00000600 |
| C | 0.37848500  | -1.20368000 | 0.00001000  |
| C | 1.76902800  | -1.19464500 | -0.00000600 |
| C | 2.45424400  | 0.01776200  | -0.00000700 |
| C | 1.75589600  | 1.22243500  | 0.00000500  |
| H | -0.17725800 | 2.15265700  | 0.00001000  |
| H | -0.15488100 | -2.14581700 | 0.00001400  |
| H | 2.32336700  | -2.12681800 | -0.00001900 |
| H | 2.30276500  | 2.15759600  | 0.00000900  |

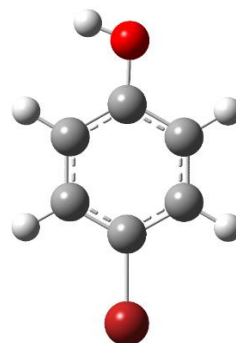

|    |             |             |             |
|----|-------------|-------------|-------------|
| O  | 3.82132100  | 0.08125100  | -0.00000100 |
| H  | 4.19214900  | -0.81031200 | 0.00003900  |
| Br | -2.21561700 | -0.00693200 | 0.00000000  |

#### 4-bromophenol anion

Charge=-1, Multiplicity=1

|    |             |             |             |
|----|-------------|-------------|-------------|
| C  | -0.42681100 | -1.20664100 | 0.00000200  |
| C  | 0.26439700  | 0.00039200  | 0.00000100  |
| C  | -0.42675000 | 1.20699000  | -0.00000300 |
| C  | -1.81530000 | 1.20446200  | -0.00000500 |
| C  | -2.57300000 | -0.00030400 | -0.00000200 |
| C  | -1.81500100 | -1.20491400 | 0.00000000  |
| H  | 0.11360300  | -2.14630500 | 0.00000300  |
| H  | 0.11301200  | 2.14705600  | -0.00000500 |
| H  | -2.35038700 | 2.14881900  | -0.00000900 |
| H  | -2.35017600 | -2.14932300 | 0.00000000  |
| O  | -3.87382200 | 0.00014100  | -0.00000800 |
| Br | 2.17769500  | -0.00003700 | 0.00000400  |

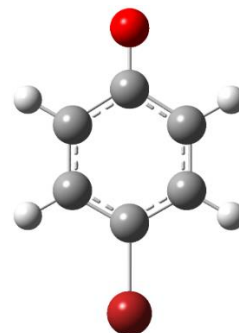

#### 4-bromophenol anion-H<sub>2</sub>O

Charge=-1, Multiplicity=1

|    |             |             |             |
|----|-------------|-------------|-------------|
| C  | -0.35947500 | 1.39050200  | 0.12502800  |
| C  | -0.82234700 | 0.08803100  | -0.02727300 |
| C  | 0.06867500  | -0.95578000 | -0.24837500 |
| C  | 1.43095400  | -0.69427400 | -0.31755900 |
| C  | 1.95094600  | 0.61737500  | -0.16835300 |
| C  | 1.00311600  | 1.64773600  | 0.05700200  |
| H  | -1.05516900 | 2.20386000  | 0.29661500  |
| H  | -0.29369600 | -1.97018800 | -0.36943200 |
| H  | 2.12269200  | -1.51111900 | -0.49753000 |
| H  | 1.36397600  | 2.66404200  | 0.17658800  |
| O  | 3.23358300  | 0.86679800  | -0.23714800 |
| Br | -2.69863200 | -0.26888400 | 0.06004600  |
| O  | 4.78061000  | -1.14239300 | 0.43339900  |
| H  | 4.17403900  | -0.39843200 | 0.15391200  |
| H  | 4.39551700  | -1.93400100 | 0.04542000  |

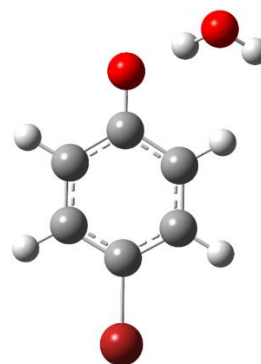



**acetaminophen**

Charge=0, Multiplicity=1

|   |             |             |             |
|---|-------------|-------------|-------------|
| C | 2.57768100  | -0.07462300 | 0.03093200  |
| C | 1.73255700  | -1.14265900 | -0.25417400 |
| C | 0.36148800  | -0.93746400 | -0.36584000 |
| C | -0.17091900 | 0.33604300  | -0.17323800 |
| C | 0.68433400  | 1.40249300  | 0.10710600  |
| C | 2.05355100  | 1.20344700  | 0.20430900  |
| H | 2.14945100  | -2.13340100 | -0.40030400 |
| H | -0.28558700 | -1.76796000 | -0.61113800 |
| H | 0.27053200  | 2.39519600  | 0.24712000  |
| H | 2.72013000  | 2.02998300  | 0.41980900  |
| O | 3.93737000  | -0.22467200 | 0.14732700  |
| H | 4.17997200  | -1.14628500 | -0.00726100 |
| N | -1.55764600 | 0.60518100  | -0.29952800 |
| H | -1.80331900 | 1.54462300  | -0.58514600 |
| C | -2.57295700 | -0.19417700 | 0.10904400  |
| O | -2.39277300 | -1.30808800 | 0.60296300  |
| C | -3.95803600 | 0.35716700  | -0.08758800 |
| H | -4.49331700 | 0.28843000  | 0.86024600  |
| H | -3.96179100 | 1.38774300  | -0.43914000 |
| H | -4.47552300 | -0.27387800 | -0.81312700 |

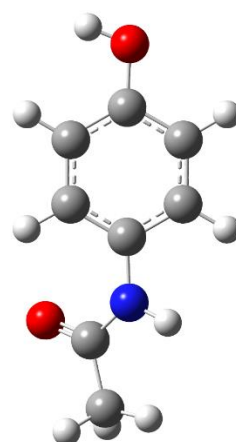**acetaminophen anion**

Charge=-1, Multiplicity=1

|   |             |             |             |
|---|-------------|-------------|-------------|
| C | 2.68351000  | -0.10469400 | 0.04828500  |
| C | 1.79120500  | -1.14801900 | -0.32509700 |
| C | 0.42776400  | -0.93710400 | -0.47058400 |
| C | -0.12485800 | 0.32170800  | -0.23265200 |
| C | 0.72083300  | 1.37001100  | 0.12855400  |
| C | 2.08773900  | 1.16926600  | 0.25803600  |
| H | 2.20495600  | -2.13493400 | -0.50729300 |
| H | -0.21632900 | -1.75512900 | -0.77336600 |
| H | 0.29800100  | 2.35445200  | 0.30592500  |
| H | 2.73100700  | 1.99825000  | 0.53595600  |
| O | 3.96358600  | -0.30340100 | 0.18690300  |
| N | -1.52127800 | 0.56957500  | -0.39230400 |
| H | -1.78700400 | 1.42904100  | -0.85485900 |
| C | -2.51265600 | -0.17026800 | 0.14444100  |
| O | -2.30488600 | -1.18996400 | 0.81186500  |
| C | -3.91382500 | 0.30846400  | -0.12159800 |
| H | -4.42670300 | 0.41937600  | 0.83497300  |
| H | -3.94590000 | 1.25130800  | -0.66576600 |

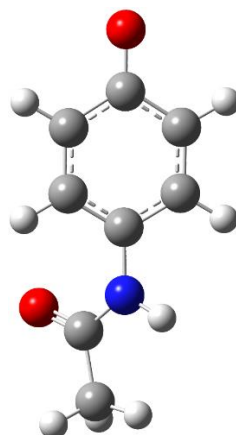

|   |             |             |             |
|---|-------------|-------------|-------------|
| H | -4.43695100 | -0.45866400 | -0.69589700 |
|---|-------------|-------------|-------------|

### acetaminophen anion-H<sub>2</sub>O

Charge=-1, Multiplicity=1

|   |             |             |             |
|---|-------------|-------------|-------------|
| C | 2.07291400  | 0.63074600  | -0.02820000 |
| C | 1.39895800  | -0.54156200 | -0.45599600 |
| C | 0.01518500  | -0.59687400 | -0.55434400 |
| C | -0.76378100 | 0.50789300  | -0.21232900 |
| C | -0.12897600 | 1.67797600  | 0.20339700  |
| C | 1.25428900  | 1.74357600  | 0.28742500  |
| H | 1.98978100  | -1.41111900 | -0.72626700 |
| H | -0.46463600 | -1.50352000 | -0.90404000 |
| H | -0.73017200 | 2.54485200  | 0.46040800  |
| H | 1.73440800  | 2.66175700  | 0.60980000  |
| O | 3.37970300  | 0.69039600  | 0.06789000  |
| N | -2.18547200 | 0.48738100  | -0.32110800 |
| H | -2.63065600 | 1.32670700  | -0.66907200 |
| C | -2.99590500 | -0.48642100 | 0.14352900  |
| O | -2.57293600 | -1.51338900 | 0.68487300  |
| C | -4.47080700 | -0.25900000 | -0.04448400 |
| H | -4.96161900 | -0.36172300 | 0.92440000  |
| H | -4.69772900 | 0.71758600  | -0.46943100 |
| H | -4.85870700 | -1.03921700 | -0.70235700 |
| O | 4.63557700  | -1.60080200 | 0.16166100  |
| H | 3.95894800  | -2.27684400 | 0.26553200  |
| H | 4.12867400  | -0.73778400 | 0.10940400  |

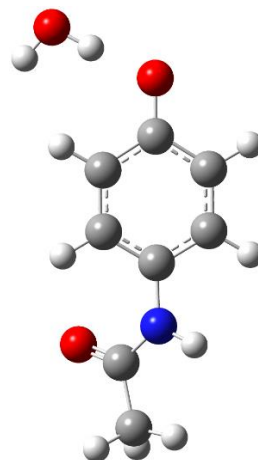

### 3-methoxyphenol

Charge=0, Multiplicity=1

|   |             |             |             |
|---|-------------|-------------|-------------|
| C | 0.55117000  | 1.79218500  | -0.00000400 |
| C | -0.70067000 | 1.17417400  | 0.00004200  |
| C | -0.75604800 | -0.21870100 | -0.00001000 |
| C | 0.41604600  | -0.97964400 | 0.00004600  |
| C | 1.64427600  | -0.33598800 | 0.00004800  |
| C | 1.72631400  | 1.05783300  | -0.00003600 |
| H | 0.60150200  | 2.87485800  | -0.00000200 |
| H | -1.59884400 | 1.77527600  | 0.00001200  |
| H | 0.35621000  | -2.06279300 | -0.00000600 |
| H | 2.69733700  | 1.53725200  | -0.00002100 |
| O | 2.82246900  | -1.03625300 | -0.00002400 |
| H | 2.63877200  | -1.98389300 | -0.00006800 |
| O | -1.91845900 | -0.93447500 | 0.00001200  |
| C | -3.14004100 | -0.20178000 | -0.00002500 |

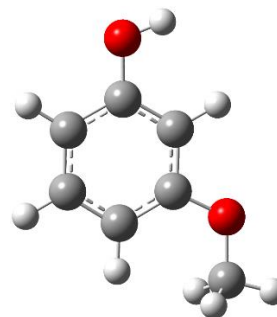

|   |             |             |             |
|---|-------------|-------------|-------------|
| H | -3.21962200 | 0.42075400  | -0.89432400 |
| H | -3.93398300 | -0.94515600 | 0.00009300  |
| H | -3.21973100 | 0.42105100  | 0.89404400  |

### 3-methoxyphenol anion

Charge=-1, Multiplicity=1

|   |             |             |             |
|---|-------------|-------------|-------------|
| C | -0.63444700 | 1.75065600  | 0.00002600  |
| C | 0.64133200  | 1.17319500  | 0.00002700  |
| C | 0.71434500  | -0.22113300 | -0.00000200 |
| C | -0.43353700 | -1.01040800 | -0.00001900 |
| C | -1.72937300 | -0.43789500 | -0.00000200 |
| C | -1.78817300 | 0.98799700  | 0.00000800  |
| H | -0.71447500 | 2.83324100  | 0.00003900  |
| H | 1.52455900  | 1.79547600  | 0.00004100  |
| H | -0.32881200 | -2.09071700 | -0.00004500 |
| H | -2.76390500 | 1.46282100  | 0.00000100  |
| O | -2.80853100 | -1.16793100 | -0.00005300 |
| O | 1.90504000  | -0.91249200 | -0.00000600 |
| C | 3.10449300  | -0.14934200 | 0.00002100  |
| H | 3.17124600  | 0.47685600  | 0.89334000  |
| H | 3.92022100  | -0.86961300 | 0.00000900  |
| H | 3.17125800  | 0.47689700  | -0.89326800 |

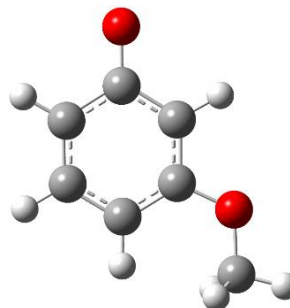

### 3-methoxyphenol anion-H<sub>2</sub>O

Charge=-1, Multiplicity=1

|   |             |             |             |
|---|-------------|-------------|-------------|
| C | -0.76496500 | 2.10865700  | 0.16050800  |
| C | -1.62424600 | 1.00392300  | 0.12782300  |
| C | -1.04791100 | -0.25595200 | -0.03859400 |
| C | 0.33105600  | -0.41213200 | -0.16658500 |
| C | 1.20366300  | 0.69818000  | -0.13321500 |
| C | 0.60672100  | 1.97770100  | 0.03638500  |
| H | -1.19417500 | 3.09724000  | 0.28810900  |
| H | -2.69186000 | 1.13789900  | 0.22695600  |
| H | 0.73504900  | -1.41017700 | -0.30286300 |
| H | 1.25175100  | 2.84944900  | 0.06475100  |
| O | 2.50104200  | 0.56178200  | -0.25509300 |
| O | -1.77875500 | -1.41978200 | -0.09165000 |
| C | -3.19295500 | -1.31006700 | 0.00774200  |
| H | -3.59699000 | -0.70552000 | -0.80830000 |
| H | -3.57925400 | -2.32464800 | -0.06580700 |
| H | -3.48664500 | -0.87689700 | 0.96720200  |
| O | 3.48724300  | -1.80671500 | 0.24629700  |
| H | 2.74637700  | -2.39402600 | 0.42413100  |

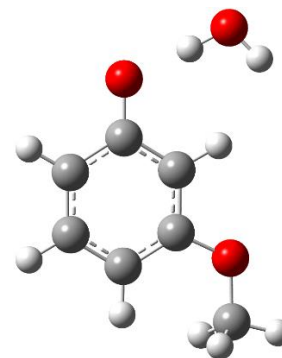

|   |            |             |            |
|---|------------|-------------|------------|
| H | 3.07132500 | -0.91747300 | 0.04500900 |
|---|------------|-------------|------------|

#### 4-(2-aminoethyl)phenol

Charge=0, Multiplicity=1

|   |             |             |             |
|---|-------------|-------------|-------------|
| C | 0.31482100  | 1.20467300  | -0.29701800 |
| C | 1.67589300  | 1.22175400  | -0.01399900 |
| C | 2.36144200  | 0.01818300  | 0.12348700  |
| C | 1.69065800  | -1.19185300 | -0.02511100 |
| C | 0.32789200  | -1.18964800 | -0.30777400 |
| C | -0.38282000 | 0.00338800  | -0.45052700 |
| H | -0.21618800 | 2.14549200  | -0.40430700 |
| H | 2.21304700  | 2.15635100  | 0.09989400  |
| H | 2.23634100  | -2.12411300 | 0.07864300  |
| H | -0.19067600 | -2.13640000 | -0.42305100 |
| O | 3.70650400  | 0.07534800  | 0.40282200  |
| H | 4.05414100  | -0.82086800 | 0.49269300  |
| C | -1.87042400 | -0.00414000 | -0.68893200 |
| H | -2.15327300 | -0.89028800 | -1.26549200 |
| H | -2.16218500 | 0.87752800  | -1.26794800 |
| C | -2.65090500 | -0.00638600 | 0.63088400  |
| H | -2.35878200 | -0.88191700 | 1.21623700  |
| H | -2.36862200 | 0.87409100  | 1.21363800  |
| N | -4.10739700 | -0.01484200 | 0.47973100  |
| H | -4.38128100 | 0.79243000  | -0.07489800 |
| H | -4.37213000 | -0.82703200 | -0.07215900 |

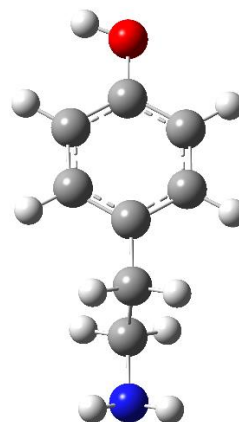

#### 4-(2-aminoethyl)phenol anion

Charge=-1, Multiplicity=1

|   |             |             |             |
|---|-------------|-------------|-------------|
| C | -0.38177900 | 1.19260800  | 0.29187800  |
| C | -1.74198800 | 1.20201400  | 0.00541400  |
| C | -2.48278300 | -0.00000300 | -0.15223600 |
| C | -1.74198100 | -1.20201500 | 0.00542300  |
| C | -0.38177200 | -1.19259900 | 0.29188700  |
| C | 0.33333700  | 0.00000700  | 0.44418700  |
| H | 0.14205000  | 2.13911000  | 0.40423600  |
| H | -2.26889300 | 2.14591900  | -0.10053600 |
| H | -2.26888100 | -2.14592400 | -0.10051800 |
| H | 0.14206200  | -2.13909600 | 0.40425300  |
| O | -3.76291800 | -0.00000800 | -0.42064000 |
| C | 1.82196200  | 0.00001100  | 0.68454600  |
| H | 2.11053200  | -0.88252500 | 1.26571700  |
| H | 2.11053300  | 0.88256500  | 1.26569000  |
| C | 2.61831000  | -0.00000900 | -0.62484200 |

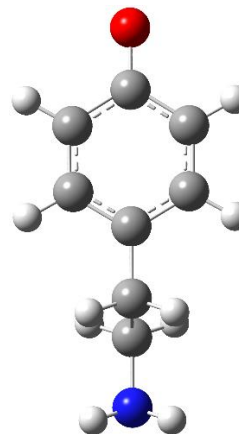

|   |            |             |             |
|---|------------|-------------|-------------|
| H | 2.33817200 | -0.87781000 | -1.21303000 |
| H | 2.33816900 | 0.87777100  | -1.21305900 |
| N | 4.07504400 | -0.00000400 | -0.46005000 |
| H | 4.33722200 | 0.80920800  | 0.09758500  |
| H | 4.33722800 | -0.80920800 | 0.09759400  |

### phenol

Charge=0, Multiplicity=1

|   |             |             |             |
|---|-------------|-------------|-------------|
| C | -1.85157500 | 0.03361100  | 0.00000500  |
| C | -1.17499600 | -1.18458800 | -0.00001300 |
| C | 0.21518000  | -1.22313200 | 0.00000400  |
| C | 0.93187400  | -0.02899400 | -0.00001200 |
| C | 0.26919400  | 1.19641600  | -0.00001700 |
| C | -1.12246000 | 1.22008600  | 0.00001300  |
| H | -2.93443200 | 0.05748000  | 0.00002000  |
| H | -1.73147800 | -2.11481800 | -0.00000700 |
| H | 0.75200600  | -2.16451300 | 0.00001400  |
| H | 0.84498400  | 2.11593300  | -0.00001200 |
| H | -1.63637600 | 2.17443800  | 0.00001700  |
| O | 2.30206200  | -0.11499100 | 0.00001600  |
| H | 2.68550600  | 0.77101200  | -0.00003000 |

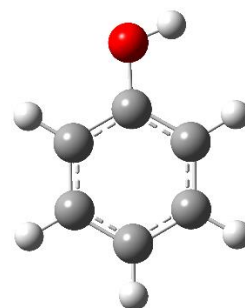

### phenol anion

Charge=-1, Multiplicity=1

|   |             |             |             |
|---|-------------|-------------|-------------|
| C | -1.09857800 | 1.19851600  | -0.00000300 |
| C | -1.81532300 | 0.00000000  | 0.00000900  |
| C | -1.09858700 | -1.19850700 | 0.00000000  |
| C | 0.29053800  | -1.20546200 | -0.00000900 |
| C | 1.04651000  | -0.00001000 | 0.00001000  |
| C | 0.29053500  | 1.20545900  | -0.00000700 |
| H | -1.63227800 | 2.14416100  | 0.00000300  |
| H | -2.89862600 | 0.00000800  | 0.00000300  |
| H | -1.63227800 | -2.14415800 | 0.00000800  |
| H | 0.83175600  | -2.14711000 | -0.00002900 |
| H | 0.83178000  | 2.14709100  | -0.00002200 |
| O | 2.35113500  | 0.00000400  | 0.00000500  |

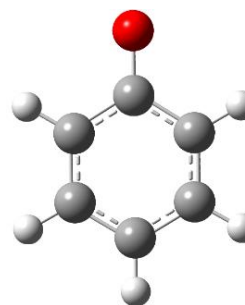

### phenol anion-H<sub>2</sub>O

Charge=-1, Multiplicity=1

|   |             |             |             |
|---|-------------|-------------|-------------|
| C | -2.20445800 | -0.70132400 | 0.02180900  |
| C | -2.33562500 | 0.68849900  | 0.02030700  |
| C | -1.17594700 | 1.46435100  | -0.00341400 |
| C | 0.08240000  | 0.87453300  | -0.02499400 |
| C | 0.23904500  | -0.53545500 | -0.02375700 |
| C | -0.95258700 | -1.30347200 | 0.00091100  |
| H | -3.09207800 | -1.32600400 | 0.04013700  |
| H | -3.31386400 | 1.15345700  | 0.03720400  |
| H | -1.25216100 | 2.54724900  | -0.00528400 |
| H | 0.97392100  | 1.49400500  | -0.04409700 |
| H | -0.86450900 | -2.38555600 | 0.00259500  |
| O | 1.42090000  | -1.10543100 | -0.04438800 |
| O | 3.52787400  | 0.42130300  | 0.09790400  |
| H | 3.34709100  | 1.20170600  | -0.43493700 |
| H | 2.69444700  | -0.13461800 | 0.03108000  |

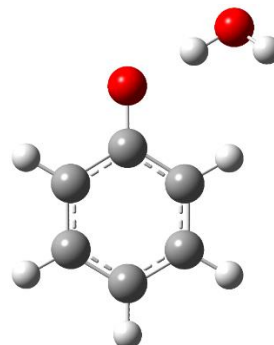

### 3-aminophenol

Charge=0, Multiplicity=1

|   |             |             |             |
|---|-------------|-------------|-------------|
| C | 1.15875400  | 1.13455000  | -0.00373700 |
| C | 1.21553800  | -0.26717900 | -0.00974900 |
| C | 0.02515000  | -1.00048900 | -0.00731700 |
| C | -1.19588500 | -0.33663200 | 0.00000700  |
| C | -1.26517900 | 1.05497600  | 0.00482700  |
| C | -0.07292100 | 1.77489700  | 0.00410800  |
| H | 2.08012600  | 1.70605700  | -0.00348000 |
| H | 0.04657400  | -2.08503400 | -0.00994000 |
| H | -2.22879300 | 1.55156300  | 0.01158500  |
| H | -0.10839400 | 2.85852200  | 0.01118600  |
| O | -2.32742100 | -1.11560700 | 0.00364700  |
| H | -3.10777200 | -0.54740000 | 0.01083600  |
| N | 2.44189400  | -0.92322900 | -0.07819900 |
| H | 2.43177400  | -1.86841400 | 0.28304500  |
| H | 3.21984700  | -0.38858000 | 0.28614800  |

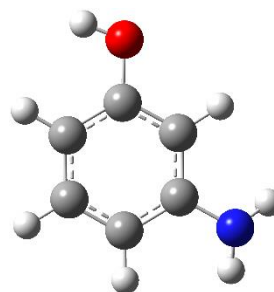

### 3-aminophenol anion

Charge=-1, Multiplicity=1

|   |             |             |             |
|---|-------------|-------------|-------------|
| C | 1.09206600  | 1.15552600  | 0.00491100  |
| C | 1.17084500  | -0.24485400 | 0.01216900  |
| C | 0.00446100  | -1.01073300 | 0.00967000  |
| C | -1.28628100 | -0.42065200 | -0.00015000 |
| C | -1.33452100 | 1.00295300  | -0.00576800 |

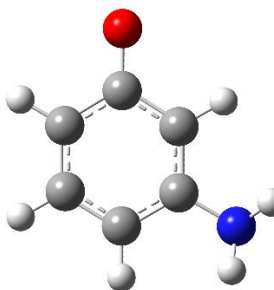

|   |             |             |             |
|---|-------------|-------------|-------------|
| C | -0.16746300 | 1.75387800  | -0.00458800 |
| H | 1.99834500  | 1.75078200  | 0.00559000  |
| H | 0.07953400  | -2.09510900 | 0.01323200  |
| H | -2.30536700 | 1.48767600  | -0.01458100 |
| H | -0.23496400 | 2.83773000  | -0.01298900 |
| O | -2.37337700 | -1.14411200 | -0.00605600 |
| N | 2.42491700  | -0.87385100 | 0.08281000  |
| H | 2.42765900  | -1.80896200 | -0.30533500 |
| H | 3.17274600  | -0.31896100 | -0.31460500 |

#### 4-methoxyphenol

Charge=0, Multiplicity=1

|   |             |             |             |
|---|-------------|-------------|-------------|
| C | -0.26800900 | 1.19631800  | -0.23012000 |
| C | -0.93184300 | -0.02308300 | -0.31909900 |
| C | -0.22826900 | -1.21597700 | -0.21084300 |
| C | 1.14995200  | -1.19355900 | -0.01964000 |
| C | 1.81288400  | 0.02730600  | 0.06812200  |
| C | 1.10767500  | 1.22372200  | -0.03766700 |
| H | -0.83174100 | 2.11838500  | -0.31701800 |
| H | -0.76006000 | -2.15799500 | -0.28219800 |
| H | 1.71140100  | -2.11822800 | 0.05978500  |
| H | 1.64227500  | 2.16389300  | 0.02916700  |
| O | 3.17113100  | 0.10620400  | 0.25842900  |
| H | 3.54135600  | -0.78299800 | 0.32044400  |
| O | -2.30095200 | -0.05030900 | -0.54011300 |
| C | -3.05733900 | 0.02113700  | 0.67163800  |
| H | -4.10902700 | -0.00561900 | 0.39099600  |
| H | -2.82482700 | -0.83196600 | 1.31514400  |
| H | -2.84111400 | 0.95218800  | 1.20280500  |

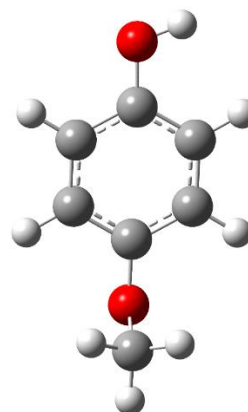

#### 4-methoxyphenol anion

Charge=-1, Multiplicity=1

|   |             |             |             |
|---|-------------|-------------|-------------|
| C | 0.19314800  | -1.20197300 | -0.21700100 |
| C | 0.88558800  | 0.00012700  | -0.32006600 |
| C | 0.19288900  | 1.20218700  | -0.21675800 |
| C | -1.18296000 | 1.20432600  | -0.01957100 |
| C | -1.93013800 | -0.00015800 | 0.08928200  |
| C | -1.18282000 | -1.20438300 | -0.01978000 |
| H | 0.73990500  | -2.13664900 | -0.29804900 |
| H | 0.73968700  | 2.13686100  | -0.29764900 |
| H | -1.71663400 | 2.14685900  | 0.05412300  |
| H | -1.71619000 | -2.14710800 | 0.05373700  |
| O | -3.22361300 | -0.00010600 | 0.27628200  |

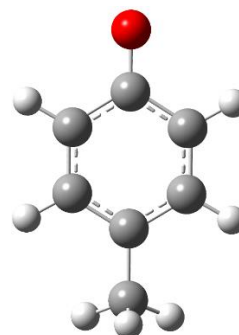

|   |            |             |             |
|---|------------|-------------|-------------|
| O | 2.26256600 | 0.00044600  | -0.54629900 |
| C | 3.01987300 | -0.00032300 | 0.66306000  |
| H | 4.07310900 | 0.00045900  | 0.38381700  |
| H | 2.79707400 | 0.89209300  | 1.25540300  |
| H | 2.79794800 | -0.89404800 | 1.25375300  |

#### 4-methoxyphenol anion-H<sub>2</sub>O

Charge=-1, Multiplicity=1

|   |             |             |             |
|---|-------------|-------------|-------------|
| C | -1.08936200 | 1.25540200  | -0.27786800 |
| C | -1.48264000 | -0.07815700 | -0.32217900 |
| C | -0.53931800 | -1.08115200 | -0.12928800 |
| C | 0.79277700  | -0.75520400 | 0.09992600  |
| C | 1.23125900  | 0.59168700  | 0.14918900  |
| C | 0.24143300  | 1.58538300  | -0.04988200 |
| H | -1.83239900 | 2.03249700  | -0.42828700 |
| H | -0.85513000 | -2.11924500 | -0.16232100 |
| H | 1.52292700  | -1.54461900 | 0.24838800  |
| H | 0.54505600  | 2.62696500  | -0.02292800 |
| O | 2.48920000  | 0.90684200  | 0.36825300  |
| O | -2.81317800 | -0.40874800 | -0.57557700 |
| C | -3.59602100 | -0.49001500 | 0.61522700  |
| H | -4.61009700 | -0.75322800 | 0.31621000  |
| H | -3.19852000 | -1.26040200 | 1.28253700  |
| H | -3.60509000 | 0.47270600  | 1.13458000  |
| O | 4.23161400  | -0.94742400 | -0.18035000 |
| H | 3.53890500  | -0.25644100 | 0.04745700  |
| H | 3.88448100  | -1.77125700 | 0.17501900  |

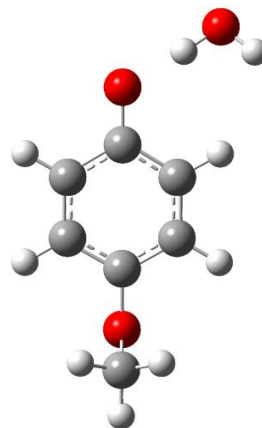

#### 4-methylphenol

Charge=0, Multiplicity=1

|   |             |             |             |
|---|-------------|-------------|-------------|
| C | 0.64175600  | -1.19870200 | -0.00434300 |
| C | 1.37568400  | -0.01326100 | -0.00471400 |
| C | 0.66770600  | 1.19336300  | -0.00431400 |
| C | -0.72064500 | 1.22021000  | -0.00070400 |
| C | -1.43044900 | 0.02145900  | 0.00157700  |
| C | -0.75203400 | -1.19165400 | -0.00070500 |
| H | 1.16440000  | -2.14964100 | -0.00781500 |
| H | 1.21489700  | 2.13089300  | -0.00776000 |
| H | -1.26310200 | 2.15870300  | -0.00148500 |
| H | -1.31327700 | -2.12042500 | -0.00150000 |
| C | 2.88210000  | -0.01985600 | 0.00548500  |
| H | 3.26819700  | 0.35573400  | 0.95697700  |
| H | 3.26906700  | -1.02923900 | -0.14063700 |

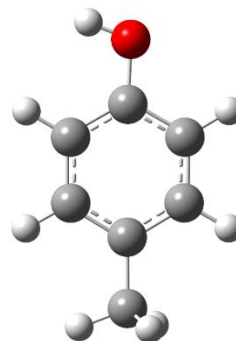



|   |             |             |             |
|---|-------------|-------------|-------------|
| H | 3.28264100  | 0.61977200  | -0.78431100 |
| O | -2.80395100 | 0.09505300  | 0.00373900  |
| H | -3.17593300 | -0.79557900 | 0.00292800  |

#### 4-methylphenol anion

Charge=-1, Multiplicity=1

|   |             |             |             |
|---|-------------|-------------|-------------|
| C | -0.60142400 | 1.19118800  | -0.01214900 |
| C | -1.33394000 | 0.00000400  | -0.01288200 |
| C | -0.60142300 | -1.19119000 | -0.01214800 |
| C | 0.78903600  | -1.20066700 | -0.00285100 |
| C | 1.54763100  | 0.00000000  | 0.00438300  |
| C | 0.78904400  | 1.20066500  | -0.00285200 |
| H | -1.13509200 | 2.13843900  | -0.02004600 |
| H | -1.13508900 | -2.13844000 | -0.02004900 |
| H | 1.32517600  | -2.14537000 | -0.00584600 |
| H | 1.32517300  | 2.14537200  | -0.00584500 |
| C | -2.84205700 | 0.00000100  | 0.01680900  |
| H | -3.22523000 | -0.00046100 | 1.04240400  |
| H | -3.24626900 | 0.88436600  | -0.48069600 |
| H | -3.24628800 | -0.88391100 | -0.48149000 |
| O | 2.85705200  | -0.00000100 | 0.01271400  |

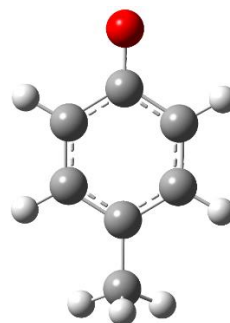

#### 4-methylphenol anion-H<sub>2</sub>O

Charge=-1, Multiplicity=1

|   |             |             |             |
|---|-------------|-------------|-------------|
| C | -1.54782900 | 1.11055400  | 0.16229400  |
| C | -1.92097000 | -0.23038100 | 0.02854800  |
| C | -0.89920500 | -1.15109000 | -0.22006000 |
| C | 0.43234900  | -0.76187100 | -0.32374100 |
| C | 0.82128300  | 0.59219400  | -0.18019300 |
| C | -0.22161800 | 1.51694100  | 0.06466800  |
| H | -2.31631800 | 1.85666700  | 0.34717100  |
| H | -1.15233500 | -2.20125300 | -0.34084000 |
| H | 1.19837900  | -1.50330100 | -0.53139300 |
| H | 0.03614500  | 2.56631600  | 0.17137900  |
| C | -3.35726300 | -0.66724500 | 0.17287200  |
| H | -3.59400300 | -0.93151600 | 1.20842100  |
| H | -4.04242200 | 0.12916700  | -0.12521600 |
| H | -3.56629400 | -1.54451100 | -0.44313800 |
| O | 2.07837100  | 0.97460700  | -0.27520000 |
| O | 3.81051900  | -0.84505200 | 0.40296600  |
| H | 3.12280300  | -0.16841300 | 0.12056000  |
| H | 3.36244200  | -1.69421100 | 0.34460300  |

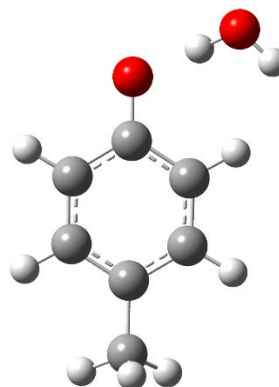

### 2-(tertbutyl)phenol

Charge=0, Multiplicity=1

|   |             |             |             |
|---|-------------|-------------|-------------|
| C | 2.13308200  | -1.52334200 | -0.00004900 |
| C | 0.74113800  | -1.45338100 | -0.00004300 |
| C | 0.04332700  | -0.24099100 | 0.00007900  |
| C | 0.82881200  | 0.92876800  | 0.00006600  |
| C | 2.22122700  | 0.87230400  | 0.00015600  |
| C | 2.87808400  | -0.35189400 | 0.00008500  |
| H | 2.62378800  | -2.48923900 | -0.00014900 |
| H | 0.18655200  | -2.38237700 | -0.00014900 |
| H | 2.78274100  | 1.80154000  | 0.00023500  |
| H | 3.96140100  | -0.38181200 | 0.00011600  |
| O | 0.20625000  | 2.15108500  | -0.00006700 |
| H | 0.87523900  | 2.84702300  | -0.00083000 |
| C | -1.48987100 | -0.19030200 | 0.00002400  |
| C | -1.99783000 | 0.52951900  | -1.26162700 |
| H | -3.09174400 | 0.52946000  | -1.26447700 |
| H | -1.65733800 | 1.56308600  | -1.31081600 |
| H | -1.65703800 | 0.00846400  | -2.16085100 |
| C | -2.10147400 | -1.59614400 | 0.00021100  |
| H | -1.81322900 | -2.16526900 | 0.88780500  |
| H | -3.19026600 | -1.50359700 | 0.00018300  |
| H | -1.81318100 | -2.16552400 | -0.88721700 |
| C | -1.99810900 | 0.52994500  | 1.26136200  |
| H | -1.65761600 | 1.56353200  | 1.31028500  |
| H | -3.09202800 | 0.52991700  | 1.26394600  |
| H | -1.65759000 | 0.00922500  | 2.16086900  |

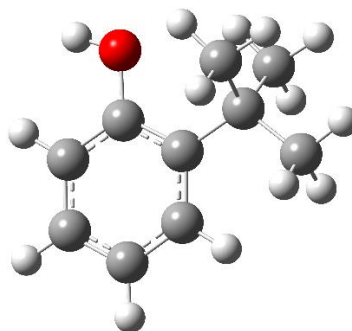

### 2-(tertbutyl)phenol anion

Charge=-1, Multiplicity=1

|   |             |             |             |
|---|-------------|-------------|-------------|
| C | 2.14718500  | -1.49268700 | -0.00003200 |
| C | 0.75236700  | -1.40681600 | -0.00004800 |
| C | 0.05544800  | -0.19660600 | -0.00001700 |
| C | 0.81183100  | 1.03180700  | -0.00001500 |
| C | 2.23035300  | 0.91099000  | 0.00004800  |
| C | 2.88456400  | -0.31217300 | 0.00002900  |
| H | 2.63562600  | -2.45998800 | -0.00005700 |
| H | 0.19558600  | -2.33638400 | -0.00008500 |
| H | 2.80179000  | 1.83490500  | 0.00009000  |
| H | 3.96996500  | -0.34194900 | 0.00006300  |
| O | 0.26586000  | 2.21373400  | -0.00006200 |
| C | -1.47935400 | -0.17135400 | 0.00000900  |
| C | -2.00173500 | 0.53824000  | -1.26197800 |

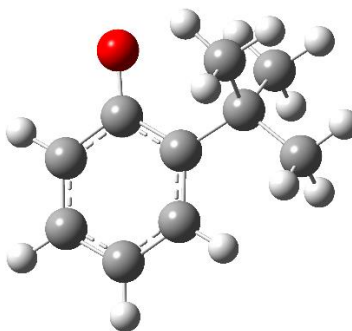

|   |             |             |             |
|---|-------------|-------------|-------------|
| H | -3.09633200 | 0.55569900  | -1.25341700 |
| H | -1.64174000 | 1.56380600  | -1.33137600 |
| H | -1.68117100 | -0.00095000 | -2.15862200 |
| C | -2.08622100 | -1.58051100 | -0.00011300 |
| H | -1.79581300 | -2.15040800 | 0.88665100  |
| H | -3.17636500 | -1.49544300 | -0.00003500 |
| H | -1.79591000 | -2.15020300 | -0.88704600 |
| C | -2.00167600 | 0.53800400  | 1.26216100  |
| H | -1.64125100 | 1.56339000  | 1.33204500  |
| H | -3.09626400 | 0.55597600  | 1.25337100  |
| H | -1.68157300 | -0.00169800 | 2.15865700  |

### OH-(3H<sub>2</sub>O)

Charge=-1, Multiplicity=1

|   |             |             |             |
|---|-------------|-------------|-------------|
| O | -0.25123600 | -0.20637800 | 0.69774600  |
| H | -0.26901100 | -0.23817600 | 1.65902700  |
| O | -2.62908900 | -0.13608700 | -0.30535000 |
| H | -1.70272800 | -0.18780000 | 0.09668600  |
| H | -2.73724900 | -0.95392300 | -0.79945100 |
| O | 1.77810800  | -1.52251400 | -0.27163200 |
| H | 0.99740300  | -1.02816700 | 0.12445000  |
| H | 2.39030400  | -0.83335700 | -0.54706800 |
| O | 1.13278900  | 1.82296800  | -0.15999100 |
| H | 0.56842200  | 1.06923700  | 0.19566000  |
| H | 0.50828000  | 2.50826800  | -0.41548700 |

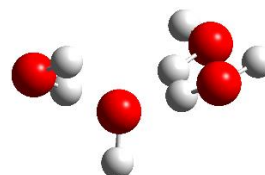

### 3H<sub>2</sub>O

Charge=0, Multiplicity=1

|   |             |             |             |
|---|-------------|-------------|-------------|
| O | -1.79998400 | -0.76453200 | 0.03183900  |
| H | -1.28733900 | 0.06156000  | -0.00789200 |
| H | -1.16537500 | -1.45019800 | -0.20122400 |
| O | -0.08671800 | 1.49616100  | -0.09850200 |
| H | -0.04219300 | 2.00730500  | 0.71643700  |
| H | 0.65310400  | 0.86308900  | -0.04594900 |
| O | 1.65600200  | -0.66688000 | -0.08231300 |
| H | 2.52792200  | -0.66314000 | 0.32831200  |
| H | 1.15948400  | -1.33659900 | 0.40212500  |

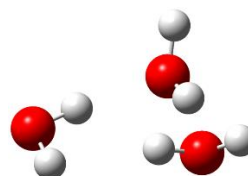

Cartesian coordinates of the optimized acids and conjugate bases of the test set studied at the M06-2X(SMD)/6-311++G(d,p) level of theory in water at 298.15 K.

### 2-bromophenol

Charge=0, Multiplicity=1

|    |             |             |             |
|----|-------------|-------------|-------------|
| C  | 0.74291500  | -1.45506600 | 0.00000700  |
| C  | 0.07891200  | -0.23502600 | 0.00000400  |
| C  | 0.78886400  | 0.96785400  | 0.00002900  |
| C  | 2.18296000  | 0.92427100  | 0.00002500  |
| C  | 2.84907100  | -0.29477600 | 0.00005200  |
| C  | 2.13330700  | -1.48830500 | 0.00006400  |
| H  | 0.17075400  | -2.37447100 | -0.00004200 |
| H  | 2.73207800  | 1.86026500  | -0.00001800 |
| H  | 3.93241200  | -0.30789100 | 0.00009000  |
| H  | 2.64750700  | -2.44108800 | 0.00008300  |
| O  | 0.10044300  | 2.14046600  | 0.00007400  |
| H  | 0.72369700  | 2.87845400  | 0.00004800  |
| Br | -1.81903300 | -0.20722000 | -0.00005300 |

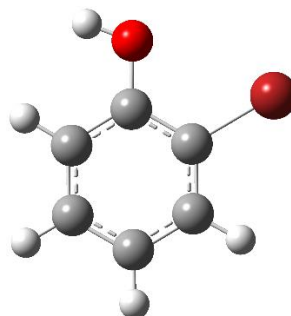

### 2-bromophenol anion

Charge=-1, Multiplicity=1

|    |             |             |             |
|----|-------------|-------------|-------------|
| C  | -0.74686600 | -1.41285600 | 0.00014100  |
| C  | -0.09289100 | -0.18906000 | 0.00006000  |
| C  | -0.76988600 | 1.06856400  | 0.00001800  |
| C  | -2.19355800 | 0.94971800  | -0.00015200 |
| C  | -2.85261900 | -0.26877500 | -0.00012000 |
| C  | -2.13917000 | -1.46931700 | 0.00007900  |
| H  | -0.16470900 | -2.32738300 | 0.00026500  |
| H  | -2.75947700 | 1.87649400  | -0.00027900 |
| H  | -3.93785000 | -0.28455900 | -0.00023100 |
| H  | -2.64697600 | -2.42568000 | 0.00016900  |
| O  | -0.18008400 | 2.21173700  | 0.00020800  |
| Br | 1.82056100  | -0.18864000 | -0.00005000 |

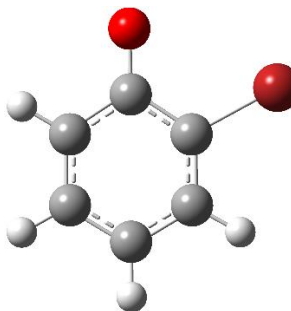

### 2-chlorophenol

Charge=0, Multiplicity=1

|   |             |             |             |
|---|-------------|-------------|-------------|
| C | -1.78733900 | -1.32302400 | 0.00004000  |
| C | -0.40533000 | -1.47465200 | 0.00003400  |
| C | 0.41101900  | -0.35155100 | 0.00000400  |
| C | -0.13183400 | 0.93379800  | -0.00001800 |
| C | -1.51851600 | 1.07521500  | -0.00001400 |
| C | -2.33935100 | -0.04481800 | 0.00001500  |
| H | -2.42402100 | -2.19871400 | 0.00006300  |

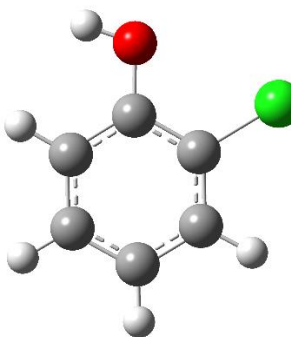

|    |             |             |             |
|----|-------------|-------------|-------------|
| H  | 0.04635700  | -2.45910100 | 0.00005200  |
| H  | -1.93771400 | 2.07576300  | -0.00003400 |
| H  | -3.41484000 | 0.08497900  | 0.00001900  |
| O  | 0.71006000  | 2.00306900  | -0.00004500 |
| H  | 0.19139600  | 2.81865400  | -0.00005300 |
| Cl | 2.14626200  | -0.54329100 | -0.00000300 |

### 2-chlorophenol anion

Charge=-1, Multiplicity=1

|    |             |             |             |
|----|-------------|-------------|-------------|
| C  | -1.75376800 | -1.33537600 | 0.00000000  |
| C  | -0.36475300 | -1.43536900 | 0.00000100  |
| C  | 0.41801700  | -0.29082100 | -0.00000100 |
| C  | -0.11397200 | 1.03229200  | -0.00000100 |
| C  | -1.53894500 | 1.07644200  | 0.00000100  |
| C  | -2.32862200 | -0.06293700 | -0.00000100 |
| H  | -2.36522700 | -2.22888700 | 0.00000100  |
| H  | 0.11822100  | -2.40627200 | -0.00000100 |
| H  | -1.99911000 | 2.05974100  | 0.00000200  |
| H  | -3.40883700 | 0.04087900  | 0.00000000  |
| O  | 0.61239900  | 2.10044900  | 0.00000000  |
| Cl | 2.16753100  | -0.48085000 | 0.00000000  |

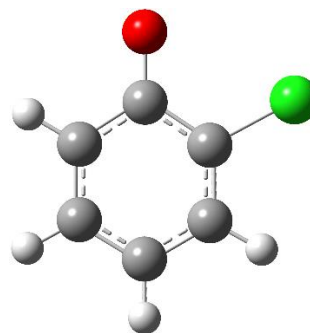

### 4-(methylthio)phenol

Charge=0, Multiplicity=1

|   |             |             |             |
|---|-------------|-------------|-------------|
| C | 0.57240000  | 0.27442300  | 0.00008000  |
| C | -0.30393700 | 1.36676300  | -0.00007700 |
| C | -1.67650800 | 1.17546000  | -0.00009700 |
| C | -2.19613800 | -0.11809300 | -0.00000500 |
| C | -1.33796600 | -1.20966700 | 0.00013900  |
| C | 0.04249200  | -1.01455600 | 0.00019800  |
| H | 0.08988100  | 2.37762800  | -0.00019900 |
| H | -2.35290000 | 2.02229000  | -0.00022300 |
| H | -1.74546800 | -2.21524900 | 0.00020900  |
| H | 0.68701400  | -1.88400900 | 0.00032800  |
| O | -3.56406300 | -0.25272700 | -0.00007600 |
| H | -3.80266200 | -1.18832000 | -0.00026200 |
| S | 2.31311000  | 0.63392100  | 0.00016100  |
| C | 3.05537400  | -1.01454400 | -0.00032800 |
| H | 2.77971800  | -1.56996800 | -0.89633200 |
| H | 4.13291500  | -0.85156600 | -0.00039800 |
| H | 2.77994200  | -1.57042900 | 0.89545100  |

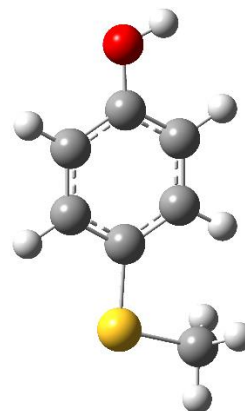

#### 4-(methylthio)phenol anion

Charge=-1, Multiplicity=1

|   |             |             |             |
|---|-------------|-------------|-------------|
| C | 0.53841400  | -0.00002700 | -0.32170100 |
| C | -0.17352100 | 1.20071500  | -0.21590000 |
| C | -1.54400000 | 1.20621400  | -0.00750800 |
| C | -2.29261900 | 0.00001200  | 0.10880200  |
| C | -1.54402100 | -1.20621100 | -0.00743300 |
| C | -0.17354100 | -1.20075000 | -0.21582300 |
| H | 0.35913700  | 2.14313300  | -0.29909900 |
| H | -2.07684500 | 2.14893500  | 0.07104000  |
| H | -2.07688300 | -2.14891800 | 0.07117200  |
| H | 0.35910100  | -2.14318200 | -0.29896000 |
| O | -3.57614400 | 0.00003000  | 0.30583700  |
| S | 2.30013400  | -0.00005100 | -0.58234500 |
| C | 2.88715300  | 0.00008900  | 1.14183100  |
| H | 2.53886400  | -0.89370800 | 1.65894900  |
| H | 3.97756800  | 0.00008600  | 1.11530300  |
| H | 2.53886600  | 0.89397000  | 1.65880500  |

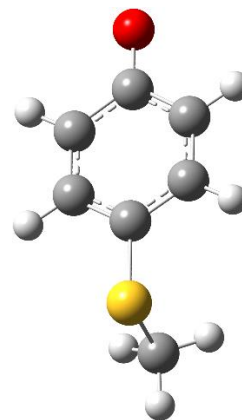

#### 4-aminophenol

Charge=0, Multiplicity=1

|   |             |             |             |
|---|-------------|-------------|-------------|
| C | -1.40892000 | 0.02200700  | 0.00220900  |
| C | -0.69817600 | 1.21736600  | -0.00011600 |
| C | 0.69118600  | 1.19997600  | -0.00777500 |
| C | 1.39510500  | -0.00871400 | -0.01096200 |
| C | 0.66680000  | -1.20098500 | -0.00773600 |
| C | -0.72467400 | -1.18823000 | -0.00033900 |
| H | -1.23773100 | 2.15755500  | 0.00557800  |
| H | 1.24120500  | 2.13522800  | -0.00923200 |
| H | 1.19571600  | -2.14829700 | -0.00915700 |
| H | -1.28150800 | -2.11969100 | 0.00522500  |
| O | -2.78854600 | 0.09174700  | 0.01004900  |
| H | -3.15467100 | -0.80089100 | 0.01038100  |
| N | 2.79821900  | -0.02197500 | -0.08211800 |
| H | 3.22262700  | 0.80472700  | 0.32092700  |
| H | 3.20726200  | -0.85730300 | 0.31902500  |

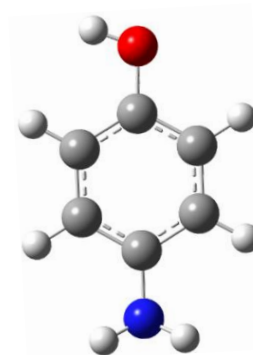

#### 4-aminophenol anion

Charge=-1, Multiplicity=1

|   |             |             |             |
|---|-------------|-------------|-------------|
| C | 1.52436300  | 0.00000500  | 0.00359000  |
| C | 0.76541900  | -1.19680300 | -0.00085600 |
| C | -0.62682400 | -1.19445900 | -0.01039900 |
| C | -1.34934800 | -0.00000700 | -0.01275300 |
| C | -0.62683500 | 1.19444800  | -0.01038300 |
| C | 0.76541200  | 1.19680500  | -0.00086200 |
| H | 1.29824400  | -2.14328300 | 0.00543500  |

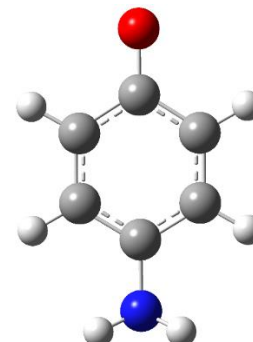

|   |             |             |             |
|---|-------------|-------------|-------------|
| H | -1.16584400 | -2.13817700 | -0.01299400 |
| H | -1.16586200 | 2.13816200  | -0.01295000 |
| H | 1.29822700  | 2.14329000  | 0.00543100  |
| O | 2.84189300  | 0.00000700  | 0.01398600  |
| N | -2.76894200 | -0.00003200 | -0.08741600 |
| H | -3.16523000 | -0.82290600 | 0.35281800  |
| H | -3.16522000 | 0.82314400  | 0.35226300  |

# ketobemidone

Charge=0, Multiplicity=1

|   |             |             |             |
|---|-------------|-------------|-------------|
| C | -3.78957900 | -0.03917400 | -0.67698800 |
| C | -3.00302000 | 0.98096600  | -1.20903700 |
| C | -1.64560900 | 1.04817300  | -0.92923200 |
| C | -1.04074600 | 0.09204000  | -0.10075600 |
| C | -1.82462700 | -0.92390600 | 0.43420200  |
| C | -3.18874400 | -0.98491200 | 0.14347500  |
| H | -4.85109100 | -0.10302700 | -0.89078100 |
| H | -3.46132600 | 1.72795500  | -1.84693300 |
| H | -1.04630800 | 1.85025500  | -1.34901900 |
| H | -1.41267900 | -1.68976400 | 1.07929300  |
| O | -3.89539100 | -2.01830600 | 0.70759900  |
| H | -4.82494100 | -1.95450100 | 0.45474400  |
| C | 0.46075700  | 0.22039700  | 0.15491100  |
| C | 0.68638400  | 1.52681600  | 0.92974100  |
| C | 1.80308600  | 2.47726700  | 0.57277300  |
| H | 2.20184900  | 2.87459700  | 1.50793800  |
| H | 2.60464800  | 1.97435000  | 0.03453300  |
| C | 1.23528700  | 3.62850200  | -0.27263600 |
| H | 0.43541700  | 4.13924900  | 0.26692700  |
| H | 2.02377800  | 4.35132100  | -0.48637600 |
| H | 0.83481500  | 3.27063100  | -1.22341700 |
| O | -0.04832300 | 1.79159700  | 1.86633500  |
| C | 1.21301900  | 0.13114500  | -1.20666200 |
| H | 0.60375100  | -0.46042100 | -1.89483500 |
| H | 1.32131800  | 1.11714700  | -1.66151500 |
| C | 1.03757200  | -0.88060400 | 1.08400200  |
| H | 0.36008400  | -1.07675800 | 1.91551300  |
| H | 1.97491900  | -0.52574300 | 1.52659300  |
| C | 1.32135200  | -2.13675800 | 0.26489400  |
| H | 0.42314600  | -2.41364900 | -0.29425700 |
| H | 1.55852600  | -2.97541600 | 0.92119000  |
| C | 2.57537100  | -0.53842800 | -1.07809800 |
| H | 3.19127400  | 0.00493400  | -0.34671900 |
| H | 3.10505700  | -0.48856800 | -2.03217100 |

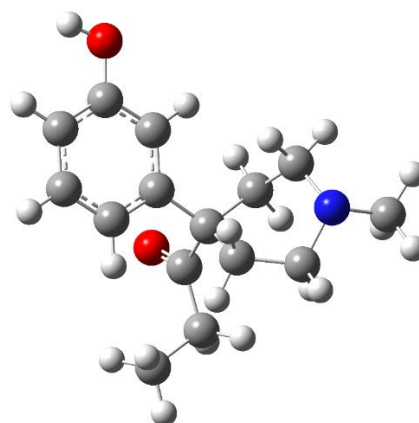

|   |            |             |             |
|---|------------|-------------|-------------|
| N | 2.44621400 | -1.95325800 | -0.68026700 |
| C | 3.70341700 | -2.37832900 | -0.07013600 |
| H | 3.67215900 | -3.44541100 | 0.15464900  |
| H | 4.52494200 | -2.19968000 | -0.76722900 |
| H | 3.92336300 | -1.83019400 | 0.85955500  |

# ketobemidone anion

Charge=-1, Multiplicity=1

|   |             |             |             |
|---|-------------|-------------|-------------|
| C | -3.82306500 | -0.16916300 | -0.64852700 |
| C | -3.07163700 | 0.87368600  | -1.17816500 |
| C | -1.70968100 | 0.99028600  | -0.91539500 |
| C | -1.08163000 | 0.03985100  | -0.09373700 |
| C | -1.83053400 | -1.00173800 | 0.43793000  |
| C | -3.22608900 | -1.15139700 | 0.18248500  |
| H | -4.88440300 | -0.24821200 | -0.86294500 |
| H | -3.55842800 | 1.61197800  | -1.80828700 |
| H | -1.13794400 | 1.81107200  | -1.33646600 |
| H | -1.37293500 | -1.75335300 | 1.07171000  |
| O | -3.90672500 | -2.14060700 | 0.69188800  |
| C | 0.42042100  | 0.21181800  | 0.15611400  |
| C | 0.61316300  | 1.52244600  | 0.93082500  |
| C | 1.67238600  | 2.52874700  | 0.54719000  |
| H | 2.06751200  | 2.94922100  | 1.47377300  |
| H | 2.48916100  | 2.06525400  | -0.00372100 |
| C | 1.03619900  | 3.64858800  | -0.29128400 |
| H | 0.20778900  | 4.10864000  | 0.25105600  |
| H | 1.78026100  | 4.41828300  | -0.50114100 |
| H | 0.65771700  | 3.27343100  | -1.24415900 |
| O | -0.09729600 | 1.74871700  | 1.89696000  |
| C | 1.17177200  | 0.14859000  | -1.20639700 |
| H | 0.58552900  | -0.47158400 | -1.88934600 |
| H | 1.23615800  | 1.13565200  | -1.66753600 |
| C | 1.04000500  | -0.86974700 | 1.08155100  |
| H | 0.36857600  | -1.09597600 | 1.90986600  |
| H | 1.96264000  | -0.48125100 | 1.52746400  |
| C | 1.37460800  | -2.11148000 | 0.26035900  |
| H | 0.48839800  | -2.42122100 | -0.30005800 |
| H | 1.64483600  | -2.94225200 | 0.91414400  |
| C | 2.56201500  | -0.46151000 | -1.08055800 |
| H | 3.15457200  | 0.10693700  | -0.34874100 |
| H | 3.08954800  | -0.38921100 | -2.03456600 |
| N | 2.49301000  | -1.88111600 | -0.68321600 |
| C | 3.76564000  | -2.25232800 | -0.07041300 |

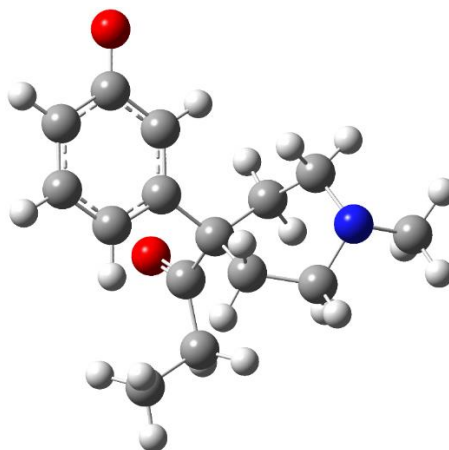



|   |            |             |             |
|---|------------|-------------|-------------|
| H | 3.77983100 | -3.31990000 | 0.15408100  |
| H | 4.58069400 | -2.03858800 | -0.76533200 |
| H | 3.96015200 | -1.69588100 | 0.86005900  |

# **profadol**

Charge=0, Multiplicity=1

|   |             |             |             |
|---|-------------|-------------|-------------|
| C | -3.72848500 | -0.85356300 | -0.01564600 |
| C | -2.77490500 | -1.85378300 | 0.15659800  |
| C | -1.42228100 | -1.54614300 | 0.21137300  |
| C | -0.97792000 | -0.22111700 | 0.09251000  |
| C | -1.93578600 | 0.77717700  | -0.08750500 |
| C | -3.29456600 | 0.45883800  | -0.13730300 |
| H | -4.78769400 | -1.07780800 | -0.05757300 |
| H | -3.09649000 | -2.88494300 | 0.24961700  |
| H | -0.69996900 | -2.34288600 | 0.34487300  |
| H | -1.65574300 | 1.81803800  | -0.19743500 |
| O | -4.25049000 | 1.43188300  | -0.31037000 |
| H | -3.82720600 | 2.29707000  | -0.37504300 |
| C | 0.81109800  | 1.57058800  | -0.04591000 |
| H | 0.44778200  | 1.87821500  | -1.03452800 |
| H | 0.22477800  | 2.12841900  | 0.69292800  |
| C | 2.26656700  | 2.01929000  | 0.09775200  |
| H | 2.63032800  | 1.78942700  | 1.10351800  |
| H | 2.91250400  | 1.47785800  | -0.59903300 |
| C | 2.39988900  | 3.51949900  | -0.15487900 |
| H | 3.43379400  | 3.85246800  | -0.03961200 |
| H | 2.07553000  | 3.77429700  | -1.16763600 |
| H | 1.78325100  | 4.08945700  | 0.54579700  |
| C | 1.15220300  | -0.45884400 | 1.46652900  |
| H | 1.33148200  | 0.34959800  | 2.17752400  |
| H | 0.48827900  | -1.18277300 | 1.94070400  |
| C | 1.26554300  | -0.77171000 | -0.94532300 |
| H | 1.94052700  | -0.12017300 | -1.51824000 |
| H | 0.57833400  | -1.23341400 | -1.65710000 |
| C | 0.52534000  | 0.06756500  | 0.13921600  |
| C | 2.42993700  | -1.15968900 | 1.02464400  |
| H | 2.78471700  | -1.90278000 | 1.74202200  |
| H | 3.24172300  | -0.43509300 | 0.85670400  |
| N | 2.03680400  | -1.80241700 | -0.23348800 |
| C | 3.19190900  | -2.22811900 | -1.00949400 |
| H | 3.76005500  | -2.97792600 | -0.45526300 |
| H | 2.86835800  | -2.67284300 | -1.95276600 |
| H | 3.86069500  | -1.38228900 | -1.23745800 |

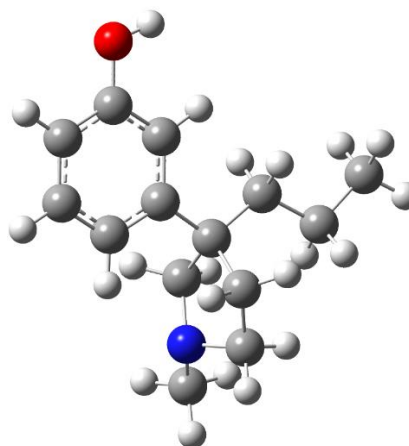

**profadol anion**

Charge=-1, Multiplicity=1

|   |             |             |             |
|---|-------------|-------------|-------------|
| C | -3.78236100 | -0.76119900 | -0.02788200 |
| C | -2.85052600 | -1.77857600 | 0.15187800  |
| C | -1.48706300 | -1.51140800 | 0.21417200  |
| C | -1.02519000 | -0.18836800 | 0.09046000  |
| C | -1.96053100 | 0.82578200  | -0.09493500 |
| C | -3.36548900 | 0.58607500  | -0.15858300 |
| H | -4.84389800 | -0.98464400 | -0.07194600 |
| H | -3.19658400 | -2.80367200 | 0.24676700  |
| H | -0.78284200 | -2.32294700 | 0.35409200  |
| H | -1.64958400 | 1.85813000  | -0.20470200 |
| O | -4.21452900 | 1.56528000  | -0.32960300 |
| C | 0.81184000  | 1.56559200  | -0.04605100 |
| H | 0.45795900  | 1.88112500  | -1.03537700 |
| H | 0.23630100  | 2.13848300  | 0.68918200  |
| C | 2.27704900  | 1.98259600  | 0.09837900  |
| H | 2.63525100  | 1.74944700  | 1.10545900  |
| H | 2.91227500  | 1.42463200  | -0.59545300 |
| C | 2.44499300  | 3.47853800  | -0.16010100 |
| H | 3.48583700  | 3.78911400  | -0.04370900 |
| H | 2.12874600  | 3.73646600  | -1.17466300 |
| H | 1.83948300  | 4.06529100  | 0.53643700  |
| C | 1.10521300  | -0.46704600 | 1.46682300  |
| H | 1.29593600  | 0.33787800  | 2.17922400  |
| H | 0.42850200  | -1.18026500 | 1.93882100  |
| C | 1.21545200  | -0.78279300 | -0.94365800 |
| H | 1.89490300  | -0.14304200 | -1.52501500 |
| H | 0.51898800  | -1.24120000 | -1.64839600 |
| C | 0.48786400  | 0.06966700  | 0.13927200  |
| C | 2.37417100  | -1.18746200 | 1.03057400  |
| H | 2.71249800  | -1.93912400 | 1.74736500  |
| H | 3.19937900  | -0.47628500 | 0.87137600  |
| N | 1.98022100  | -1.81991800 | -0.23250100 |
| C | 3.13289800  | -2.25583500 | -1.00570200 |
| H | 3.69329400  | -3.01077500 | -0.45029300 |
| H | 2.80767200  | -2.69800500 | -1.94970500 |
| H | 3.81064400  | -1.41679800 | -1.23301800 |

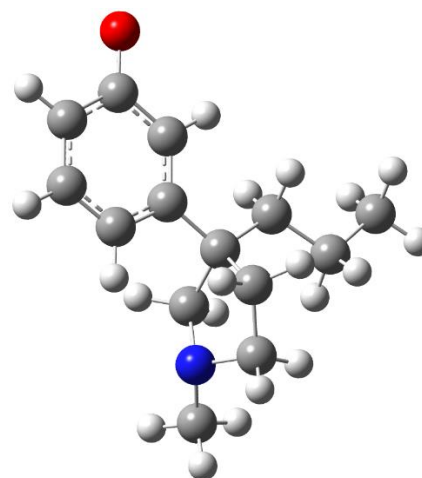

**tapentadol**

Charge=0, Multiplicity=1

|   |             |             |             |
|---|-------------|-------------|-------------|
| C | 3.26237900  | -0.74010400 | -0.66302200 |
| C | 4.04771300  | -0.44606900 | 0.45084300  |
| C | 3.49623200  | 0.30617500  | 1.47937100  |
| C | 2.17871900  | 0.75801300  | 1.40564000  |
| C | 1.39310600  | 0.46116000  | 0.29220800  |
| C | 1.94902600  | -0.29176100 | -0.74640600 |
| H | 5.06917500  | -0.80507500 | 0.49448500  |
| H | 4.09947100  | 0.54136600  | 2.34899600  |
| H | 1.75647000  | 1.33906100  | 2.21833600  |
| H | 1.36079200  | -0.53363300 | -1.62809500 |
| O | 3.83915300  | -1.48455300 | -1.66355200 |
| H | 3.19874200  | -1.62759800 | -2.37177000 |
| C | -0.04567600 | 0.92805600  | 0.19891300  |
| H | -0.24399100 | 1.54180900  | 1.08681600  |
| C | -0.25486200 | 1.81290700  | -1.05641400 |
| H | 0.71960900  | 2.15403200  | -1.41532000 |
| H | -0.68139400 | 1.20731500  | -1.86340100 |
| C | -1.12094400 | 3.04628300  | -0.80208100 |
| H | -0.65310900 | 3.68755300  | -0.05001200 |
| H | -1.23695800 | 3.63365200  | -1.71626000 |
| H | -2.11778400 | 2.78671300  | -0.44167600 |
| C | -1.00425000 | -0.29019000 | 0.25955100  |
| H | -0.77348800 | -0.91505300 | -0.61212000 |
| C | -0.77314000 | -1.10647400 | 1.53009300  |
| H | 0.26344800  | -1.44121400 | 1.60521800  |
| H | -0.99949100 | -0.50263800 | 2.41593200  |
| H | -1.41259300 | -1.98992100 | 1.55313600  |
| C | -2.45994100 | 0.17270800  | 0.15555100  |
| H | -2.64525600 | 0.92729800  | 0.92857600  |
| H | -2.61677200 | 0.65915400  | -0.82172100 |
| N | -3.46374100 | -0.88565300 | 0.32312500  |
| C | -3.28485100 | -1.92079700 | -0.69026800 |
| H | -4.10738300 | -2.63555900 | -0.62899500 |
| H | -3.27170700 | -1.49744700 | -1.70883900 |
| H | -2.35325300 | -2.46524100 | -0.53141600 |
| C | -4.78590000 | -0.28875100 | 0.15789400  |
| H | -4.91503500 | 0.14975400  | -0.84536900 |
| H | -5.55833000 | -1.04635800 | 0.30196700  |
| H | -4.93385700 | 0.50109100  | 0.89682300  |

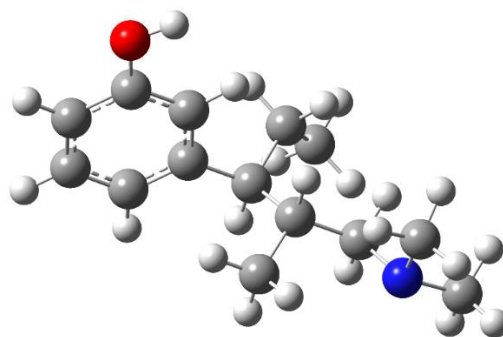

**tapentadol anion**

Charge=-1, Multiplicity=1

|   |             |             |             |
|---|-------------|-------------|-------------|
| C | 3.30794800  | -0.80086800 | -0.76894600 |
| C | 4.08011300  | -0.48587700 | 0.38526400  |
| C | 3.54519100  | 0.25612700  | 1.42775700  |
| C | 2.22654000  | 0.71812700  | 1.38626300  |
| C | 1.43393100  | 0.42482500  | 0.27231600  |
| C | 1.97278000  | -0.31773200 | -0.77789300 |
| H | 5.10621900  | -0.83849100 | 0.42945600  |
| H | 4.16354600  | 0.48051600  | 2.29192400  |
| H | 1.81573900  | 1.29267100  | 2.20959200  |
| H | 1.36114900  | -0.54298700 | -1.64890400 |
| O | 3.80185100  | -1.49371100 | -1.75991400 |
| C | -0.00617800 | 0.90274900  | 0.20418900  |
| H | -0.19429500 | 1.49379900  | 1.11041000  |
| C | -0.22438300 | 1.82638200  | -1.02146900 |
| H | 0.74891000  | 2.16989000  | -1.38100100 |
| H | -0.66425200 | 1.24887200  | -1.84206900 |
| C | -1.07774300 | 3.05928400  | -0.72338200 |
| H | -0.59717900 | 3.67435300  | 0.04265200  |
| H | -1.19757400 | 3.67511600  | -1.61834900 |
| H | -2.07356600 | 2.79860400  | -0.36071400 |
| C | -0.97862200 | -0.30508900 | 0.24013900  |
| H | -0.76297900 | -0.90824900 | -0.65018900 |
| C | -0.74470600 | -1.15980900 | 1.48465600  |
| H | 0.29138700  | -1.49922900 | 1.54286000  |
| H | -0.96327600 | -0.58151800 | 2.38949000  |
| H | -1.38743800 | -2.04145400 | 1.48622200  |
| C | -2.43077500 | 0.17403300  | 0.16420400  |
| H | -2.60145500 | 0.90858000  | 0.95970800  |
| H | -2.59270500 | 0.68928800  | -0.79741000 |
| N | -3.44488000 | -0.87796300 | 0.31237300  |
| C | -3.28662700 | -1.88657000 | -0.73066000 |
| H | -4.11518100 | -2.59526700 | -0.68015200 |
| H | -3.28021100 | -1.43553000 | -1.73737500 |
| H | -2.35838500 | -2.44326000 | -0.59709000 |
| C | -4.76199000 | -0.26320900 | 0.17624800  |
| H | -4.89589900 | 0.20422300  | -0.81330600 |
| H | -5.54125400 | -1.01631300 | 0.30691200  |
| H | -4.89482300 | 0.50756900  | 0.93791100  |

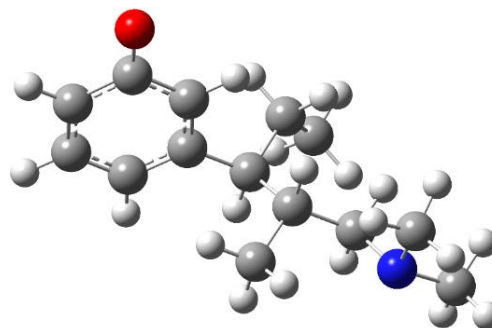

**(R)-Trolox**

Charge=-1, Multiplicity=1

|   |             |             |             |
|---|-------------|-------------|-------------|
| C | 2.41254900  | -0.85214600 | 0.01996600  |
| C | 1.12909500  | -1.37664200 | -0.17205800 |
| C | 0.05896000  | -0.49096500 | -0.36068600 |
| C | 0.23395300  | 0.89349000  | -0.33116600 |
| C | 1.51009000  | 1.41800900  | -0.07948000 |
| C | 2.57614700  | 0.53695700  | 0.08336200  |
| O | -1.17249000 | -1.06579100 | -0.60441900 |
| C | -0.93742200 | 1.82085800  | -0.56143000 |
| H | -1.22512800 | 2.28693500  | 0.38889900  |
| H | -0.63761500 | 2.63572900  | -1.22476300 |
| C | -2.12645400 | 1.07226400  | -1.15110200 |
| H | -3.03378200 | 1.67362800  | -1.09350400 |
| H | -1.94357300 | 0.83298800  | -2.20328400 |
| C | -2.33054400 | -0.24564500 | -0.41167400 |
| O | 3.82504000  | 1.09275900  | 0.30222100  |
| H | 4.46064000  | 0.40113700  | 0.51868300  |
| C | 1.71886700  | 2.90802400  | -0.00792700 |
| H | 1.71520500  | 3.35416300  | -1.00775500 |
| H | 0.91975900  | 3.38574000  | 0.56253500  |
| H | 2.66880700  | 3.15231800  | 0.46360500  |
| C | 3.62262900  | -1.74061500 | 0.16570600  |
| H | 4.45082600  | -1.37732400 | -0.45023600 |
| H | 3.97405900  | -1.77557000 | 1.20266400  |
| H | 3.41431700  | -2.76052300 | -0.14971300 |
| C | 0.88733000  | -2.86543600 | -0.17839500 |
| H | -0.16682300 | -3.08703700 | -0.02484900 |
| H | 1.18955300  | -3.31561400 | -1.12929200 |
| H | 1.45570500  | -3.35679700 | 0.61249900  |
| C | -3.49343100 | -1.04560800 | -0.97914700 |
| H | -3.59033800 | -2.00070900 | -0.45723100 |
| H | -4.42191800 | -0.48537300 | -0.86497000 |
| H | -3.32423800 | -1.23788000 | -2.04103600 |
| C | -2.58357400 | -0.00575300 | 1.10277400  |
| O | -1.89689500 | -0.64507000 | 1.93284900  |
| O | -3.50248200 | 0.80728200  | 1.37751100  |

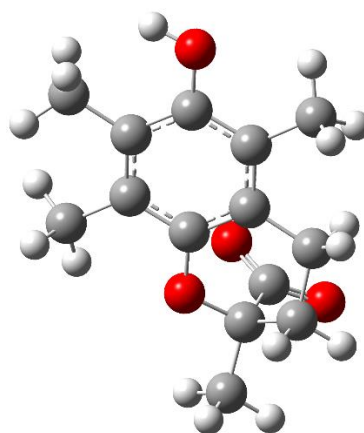

**(R)-Trolox anion**

Charge=-2, Multiplicity=1

|   |             |             |             |
|---|-------------|-------------|-------------|
| C | -0.08682300 | 0.47002300  | -0.37811900 |
| C | -0.27216800 | -0.91328500 | -0.32696300 |
| C | -2.66543800 | -0.55865200 | 0.09895300  |
| O | -3.87556000 | -1.03605500 | 0.30889300  |
| C | 0.90207100  | -1.84509200 | -0.55641100 |
| H | 1.18404200  | -2.31917600 | 0.39109600  |
| H | 0.60697700  | -2.65451600 | -1.22830800 |
| C | 2.10347200  | -1.10730600 | -1.13580900 |
| H | 1.93748700  | -0.88212300 | -2.19424900 |
| H | 3.00704400  | -1.71280100 | -1.05969700 |
| C | 2.30190800  | 0.22460400  | -0.42072300 |
| C | 3.48270900  | 1.00079000  | -0.98833000 |
| H | 3.57612500  | 1.97006400  | -0.49241000 |
| H | 4.40599200  | 0.43874900  | -0.84138700 |
| H | 3.33524800  | 1.16400300  | -2.05846300 |
| C | 2.54393500  | 0.03496300  | 1.10324200  |
| O | 1.15507000  | 1.04052800  | -0.65532500 |
| C | -1.15201600 | 1.35902200  | -0.18062200 |
| C | -2.43766900 | 0.84552100  | 0.02445600  |
| C | -1.55127400 | -1.42395700 | -0.05876000 |
| C | -3.63501800 | 1.74857600  | 0.17913600  |
| H | -4.47109800 | 1.37246400  | -0.41561800 |
| H | -3.98462400 | 1.78200200  | 1.21762000  |
| H | -3.42880900 | 2.77020700  | -0.13749200 |
| C | -0.89522300 | 2.84842700  | -0.19230000 |
| H | 0.16142800  | 3.06262400  | -0.04135800 |
| H | -1.19462000 | 3.30370900  | -1.14219400 |
| H | -1.45668000 | 3.34861400  | 0.59839600  |
| C | -1.79034300 | -2.90815800 | 0.05479500  |
| H | -2.23110900 | -3.32046700 | -0.86089100 |
| H | -0.87373900 | -3.46107500 | 0.25897500  |
| H | -2.49759700 | -3.11618900 | 0.86051200  |
| O | 3.38024100  | -0.84893800 | 1.42205400  |
| O | 1.94464900  | 0.79459800  | 1.90065300  |

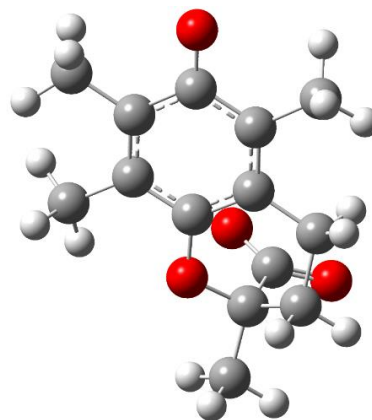

**(R)-Trolox Ref 32's methodology**

Charge=-1, Multiplicity=1

|   |             |             |             |
|---|-------------|-------------|-------------|
| C | -1.26718500 | 1.42674500  | -0.21783500 |
| C | 0.11140200  | 1.70942800  | -0.29122600 |
| C | 1.02122000  | 0.63964400  | -0.39014000 |
| C | 0.59460700  | -0.69582600 | -0.41756100 |
| C | -0.77938600 | -0.98268200 | -0.28797800 |
| C | -1.68373200 | 0.08343000  | -0.17510000 |
| O | 2.36138600  | 0.98732500  | -0.49845800 |
| C | 1.60502900  | -1.81271200 | -0.57983000 |
| H | 1.73368100  | -2.33954900 | 0.37628300  |
| H | 1.22585500  | -2.56025800 | -1.28476800 |
| C | 2.95553400  | -1.28786500 | -1.07051700 |
| H | 3.72688600  | -2.05505100 | -0.97240500 |
| H | 2.89145100  | -1.01467300 | -2.13081900 |
| C | 3.36925600  | -0.03313400 | -0.29582300 |
| O | -3.03113000 | -0.25183800 | -0.05499400 |
| H | -3.60243000 | 0.48519900  | 0.26194400  |
| C | -1.25065500 | -2.41908000 | -0.28933800 |
| H | -1.09084200 | -2.88780300 | -1.26894000 |
| H | -0.69637600 | -3.01803100 | 0.44196100  |
| H | -2.31127300 | -2.50038300 | -0.05463500 |
| C | -2.28066700 | 2.54985300  | -0.18897700 |
| H | -3.20475800 | 2.27133100  | -0.70391700 |
| H | -2.55031200 | 2.83757800  | 0.83531600  |
| H | -1.89476800 | 3.44158400  | -0.68633000 |
| C | 0.61036300  | 3.13746800  | -0.27523100 |
| H | 1.67748600  | 3.17883400  | -0.05538600 |
| H | 0.45446300  | 3.63244400  | -1.24303000 |
| H | 0.08758500  | 3.73361200  | 0.47875500  |
| C | 4.66127900  | 0.57784100  | -0.84423600 |
| H | 4.91194500  | 1.50022300  | -0.31000900 |
| H | 5.48921300  | -0.12610100 | -0.73106000 |
| H | 4.54185700  | 0.81012100  | -1.90741800 |
| C | 3.56334700  | -0.32961900 | 1.22721600  |
| O | 2.98050700  | 0.40806000  | 2.07342200  |
| O | 4.34207300  | -1.29247500 | 1.50609600  |
| O | -5.07426300 | 1.22915900  | 1.05203700  |
| H | -5.61719300 | 0.48012200  | 1.34148300  |
| H | -5.62124500 | 1.69743000  | 0.40363300  |
| O | -4.16921400 | -1.40649300 | -2.37502100 |
| H | -3.76010500 | -1.02645200 | -1.56958200 |
| H | -3.66167400 | -2.21161600 | -2.55083300 |

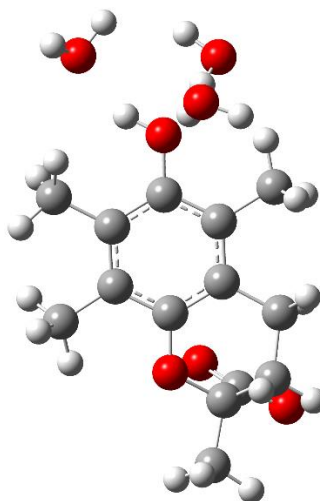

|   |             |             |            |
|---|-------------|-------------|------------|
| O | -3.91076500 | -1.81976300 | 2.26430800 |
| H | -3.56778100 | -1.33498000 | 1.48874100 |
| H | -4.53289400 | -1.20632800 | 2.68135300 |

**(R)-Trolox anion Ref 32's methodology**

Charge=-2, Multiplicity=1

|   |             |             |             |
|---|-------------|-------------|-------------|
| C | -1.31966400 | 1.34217800  | -0.03263200 |
| C | 0.04173200  | 1.63640300  | -0.24371400 |
| C | 0.95928100  | 0.57818000  | -0.37034700 |
| C | 0.54824100  | -0.76095700 | -0.29567300 |
| C | -0.81208800 | -1.05337600 | -0.06232000 |
| C | -1.76562300 | -0.00695000 | 0.03180100  |
| O | 2.29013800  | 0.94051700  | -0.59594400 |
| C | 1.56860900  | -1.87004200 | -0.47909800 |
| H | 1.79667100  | -2.33914400 | 0.48861300  |
| H | 1.15083600  | -2.66434600 | -1.10660100 |
| C | 2.85919600  | -1.35229300 | -1.11633600 |
| H | 3.64896300  | -2.10504800 | -1.05776400 |
| H | 2.69214700  | -1.12873900 | -2.17734000 |
| C | 3.32284800  | -0.05774500 | -0.44139200 |
| O | -3.07779500 | -0.28582600 | 0.18762100  |
| C | -1.26933800 | -2.48730200 | 0.09069900  |
| H | -1.61473200 | -2.92031900 | -0.85883700 |
| H | -0.46967100 | -3.13062700 | 0.46619800  |
| H | -2.10518100 | -2.55313100 | 0.79222800  |
| C | -2.30812600 | 2.47540100  | 0.13302100  |
| H | -2.52121100 | 2.98080300  | -0.81911800 |
| H | -3.25737300 | 2.11431500  | 0.53089700  |
| H | -1.92580400 | 3.24238200  | 0.81595300  |
| C | 0.50133700  | 3.07578100  | -0.33484000 |
| H | 1.52931500  | 3.15102500  | -0.69022800 |
| H | -0.13350200 | 3.65239100  | -1.01676300 |
| H | 0.45142500  | 3.57689500  | 0.64115500  |
| C | 4.55394800  | 0.53585800  | -1.13296300 |
| H | 4.84033700  | 1.48527200  | -0.66829200 |
| H | 5.39803600  | -0.15444900 | -1.06292100 |
| H | 4.33620100  | 0.71609800  | -2.19072300 |
| C | 3.66411900  | -0.28343800 | 1.06808600  |
| O | 3.15263600  | 0.48456700  | 1.93350000  |
| O | 4.48211600  | -1.22288700 | 1.31644000  |
| H | -3.95853900 | -1.66794300 | -0.26905100 |
| O | -4.62012500 | -2.36763100 | -0.53041800 |
| H | -4.14173500 | -3.20453000 | -0.45432400 |

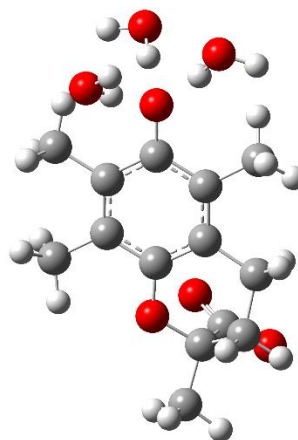



|   |             |            |             |
|---|-------------|------------|-------------|
| O | -4.03089200 | 0.20129100 | 2.61036800  |
| H | -3.66103400 | 0.04620200 | 1.68906500  |
| H | -4.02994100 | 1.16228600 | 2.72056000  |
| O | -4.70568900 | 0.82620900 | -1.63220300 |
| H | -4.08082100 | 0.44723800 | -0.94797900 |
| H | -5.13432400 | 0.05325500 | -2.02539400 |

### $\Delta^9$ -tetrahydrocannabinol ( $\Delta^9$ -THC)

Charge=0, Multiplicity=1

|   |             |             |             |
|---|-------------|-------------|-------------|
| C | -1.20654100 | -1.27814300 | 0.24657700  |
| C | 0.16551600  | -1.03130200 | 0.15745600  |
| C | 0.74009500  | 0.14725500  | 0.64775300  |
| C | -0.11555300 | 1.01040200  | 1.34835700  |
| C | -1.48259300 | 0.77996600  | 1.44659400  |
| C | -2.04271600 | -0.36505600 | 0.87701500  |
| H | -1.59933000 | -2.20107200 | -0.16612700 |
| H | -2.10323800 | 1.48863100  | 1.98757200  |
| O | 0.45631500  | 2.09106600  | 1.97073900  |
| H | -0.22925500 | 2.59464200  | 2.42739700  |
| O | 0.90775900  | -2.01958500 | -0.43337100 |
| C | 2.22555600  | 0.40481600  | 0.49674100  |
| H | 2.68634700  | 0.25947600  | 1.48518100  |
| C | 2.84232600  | -0.61222400 | -0.47160900 |
| H | 2.46795500  | -0.37630600 | -1.47769600 |
| C | 2.34291900  | -2.02730400 | -0.18194300 |
| C | 2.59192000  | 1.79599400  | 0.01059900  |
| C | 3.70363000  | 2.04271100  | -0.68875800 |
| H | 1.92761100  | 2.61775300  | 0.25240300  |
| C | 4.68130600  | 0.95931800  | -1.07656000 |
| H | 5.69172500  | 1.27194000  | -0.79253000 |
| H | 4.68715300  | 0.89455200  | -2.17226600 |
| C | 4.35552600  | -0.41312700 | -0.47772000 |
| H | 4.85792400  | -1.19009200 | -1.05719500 |
| H | 4.73034600  | -0.47515200 | 0.54931500  |
| C | 2.59101000  | -2.48923000 | 1.24945900  |
| H | 2.25283100  | -3.52118100 | 1.36770400  |
| H | 3.65987100  | -2.44831200 | 1.47203300  |
| H | 2.06374500  | -1.86716600 | 1.97563000  |
| C | 2.88854800  | -3.03983900 | -1.17449900 |
| H | 2.78763300  | -2.67179000 | -2.19851100 |
| H | 3.94142700  | -3.24202500 | -0.97390600 |
| H | 2.33730300  | -3.97789000 | -1.07884100 |
| C | 4.05411200  | 3.42325200  | -1.16793700 |

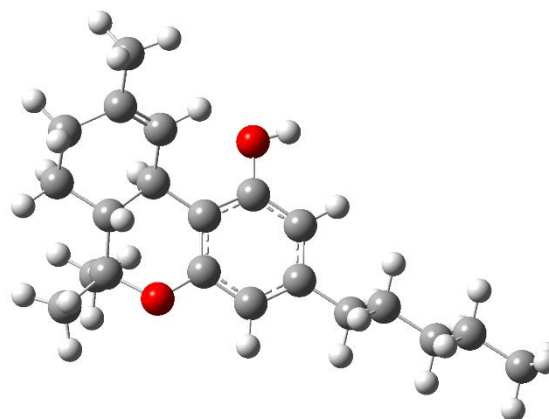

|   |             |             |             |
|---|-------------|-------------|-------------|
| H | 5.00819800  | 3.74793100  | -0.74061900 |
| H | 4.17616500  | 3.43086200  | -2.25599700 |
| H | 3.28664400  | 4.15043000  | -0.89788900 |
| C | -3.53269300 | -0.58547700 | 0.92476700  |
| H | -3.92594600 | -0.22919200 | 1.88186600  |
| H | -3.74717000 | -1.65600900 | 0.85826300  |
| C | -4.25439800 | 0.14485800  | -0.21455100 |
| H | -4.02999900 | 1.21587800  | -0.15268600 |
| H | -3.85724900 | -0.20714800 | -1.17360100 |
| C | -5.76512700 | -0.06383200 | -0.17763200 |
| H | -6.15539200 | 0.28387800  | 0.78663900  |
| H | -5.98494800 | -1.13682400 | -0.23490200 |
| C | -6.49411900 | 0.66058500  | -1.30651900 |
| H | -6.27081200 | 1.73141000  | -1.24890400 |
| H | -6.10338800 | 0.31143500  | -2.26842100 |
| C | -8.00399300 | 0.44677200  | -1.25651700 |
| H | -8.41680500 | 0.81228400  | -0.31205100 |
| H | -8.51162400 | 0.97085600  | -2.06950900 |
| H | -8.24870600 | -0.61602000 | -1.33773400 |

#### $\Delta^9$ -tetrahydrocannabinol anion

Charge=-1, Multiplicity=1

|   |             |             |             |
|---|-------------|-------------|-------------|
| C | -1.22732900 | -1.22241200 | 0.27294700  |
| C | 0.14686200  | -0.98114300 | 0.17583300  |
| C | 0.74260400  | 0.17848300  | 0.67227100  |
| C | -0.05903000 | 1.08540500  | 1.44181400  |
| C | -1.45623600 | 0.83540200  | 1.50011100  |
| C | -2.03597700 | -0.29076000 | 0.92380100  |
| H | -1.63840400 | -2.13688600 | -0.14086300 |
| H | -2.07373600 | 1.53942900  | 2.05224500  |
| O | 0.47452100  | 2.08516700  | 2.08240900  |
| O | 0.87348200  | -1.98182200 | -0.44082500 |
| C | 2.22981000  | 0.40468200  | 0.50583400  |
| H | 2.70593400  | 0.25579900  | 1.48795400  |
| C | 2.83117700  | -0.61307500 | -0.47046500 |
| H | 2.45832500  | -0.36442300 | -1.47448400 |
| C | 2.30443700  | -2.02043300 | -0.19220200 |
| C | 2.60918800  | 1.79082000  | 0.01743100  |
| C | 3.72105900  | 2.02941600  | -0.68510400 |
| H | 1.94422200  | 2.61293000  | 0.25878900  |
| C | 4.69081900  | 0.93693900  | -1.07140300 |
| H | 5.70341700  | 1.23712000  | -0.78074100 |
| H | 4.70295000  | 0.87710400  | -2.16757100 |

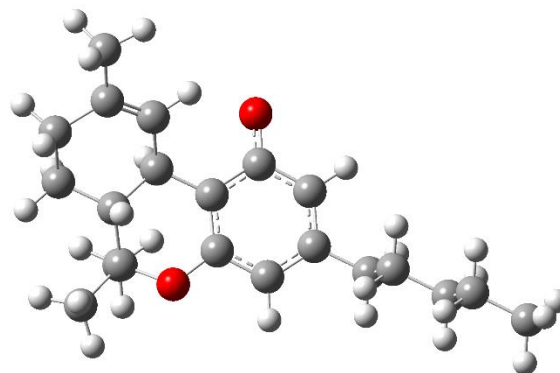

|   |             |             |             |
|---|-------------|-------------|-------------|
| C | 4.34733000  | -0.43676100 | -0.48241700 |
| H | 4.83766000  | -1.21541800 | -1.07060000 |
| H | 4.72620800  | -0.51268200 | 0.54231300  |
| C | 2.55225500  | -2.49858900 | 1.23473900  |
| H | 2.19050900  | -3.52324300 | 1.34911000  |
| H | 3.62327900  | -2.48523300 | 1.45113200  |
| H | 2.04432800  | -1.86805300 | 1.96707700  |
| C | 2.83211400  | -3.03586100 | -1.19274000 |
| H | 2.73239900  | -2.66063500 | -2.21446900 |
| H | 3.88306100  | -3.25492000 | -0.99892200 |
| H | 2.26789800  | -3.96685600 | -1.10155100 |
| C | 4.08059400  | 3.40511600  | -1.17317700 |
| H | 5.03914400  | 3.72600400  | -0.75255000 |
| H | 4.19698600  | 3.40828300  | -2.26208000 |
| H | 3.32002100  | 4.13944900  | -0.90241800 |
| C | -3.53144000 | -0.49248800 | 0.97656200  |
| H | -3.92688600 | -0.08115200 | 1.91074300  |
| H | -3.75931600 | -1.56321700 | 0.96885900  |
| C | -4.24880200 | 0.17617400  | -0.20256000 |
| H | -4.02423800 | 1.24903100  | -0.19663800 |
| H | -3.84818900 | -0.22541300 | -1.14060700 |
| C | -5.76018900 | -0.02927300 | -0.16377400 |
| H | -6.15580800 | 0.36594500  | 0.77989300  |
| H | -5.98034900 | -1.10386600 | -0.16823000 |
| C | -6.48438500 | 0.63711500  | -1.33091300 |
| H | -6.26446200 | 1.71017800  | -1.32414100 |
| H | -6.08662200 | 0.24306500  | -2.27241300 |
| C | -7.99402900 | 0.42141200  | -1.28035300 |
| H | -8.41417900 | 0.83092300  | -0.35740800 |
| H | -8.49790200 | 0.90380700  | -2.12106200 |
| H | -8.23525800 | -0.64485100 | -1.31144100 |

**$\Delta^9$ -tetrahydrocannabinol ( $\Delta^9$ -THC) Ref 32's**

**methodology**

Charge=0, Multiplicity=1

|   |             |            |             |
|---|-------------|------------|-------------|
| O | 1.11535500  | 4.15103800 | -1.76634900 |
| H | 0.83301900  | 4.93709700 | -1.27936600 |
| H | 0.88940600  | 4.33724200 | -2.68736500 |
| O | -2.67401900 | 2.64762100 | -2.49070500 |
| H | -1.94542300 | 2.41225800 | -1.88670100 |
| H | -3.39769300 | 2.06749100 | -2.22427600 |
| O | 0.05352500  | 3.97279700 | 1.62202200  |
| H | -0.17782600 | 3.31837900 | 0.94452200  |

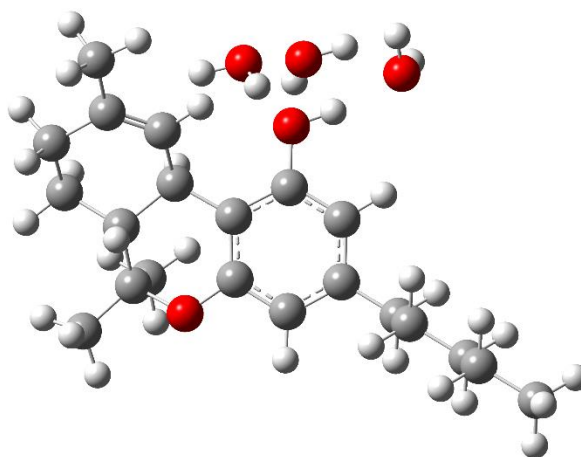

|   |             |             |             |
|---|-------------|-------------|-------------|
| H | 0.67219100  | 4.56424800  | 1.17568100  |
| C | 1.31367000  | -1.63396300 | -0.56916000 |
| C | -0.06193500 | -1.47765800 | -0.36772000 |
| C | -0.67816600 | -0.21526800 | -0.34399000 |
| C | 0.15138700  | 0.88008400  | -0.65541600 |
| C | 1.52367100  | 0.73635500  | -0.85875600 |
| C | 2.12350300  | -0.52548700 | -0.80097200 |
| H | 1.72934200  | -2.63561400 | -0.56368300 |
| H | 2.11989800  | 1.61457000  | -1.08052500 |
| O | -0.42990700 | 2.12519800  | -0.77655000 |
| H | 0.20708600  | 2.77881000  | -1.15726500 |
| O | -0.76245700 | -2.65046100 | -0.19969200 |
| C | -2.17730700 | -0.10341600 | -0.09644700 |
| H | -2.64490000 | 0.12035700  | -1.06733300 |
| C | -2.75523800 | -1.44284800 | 0.40552600  |
| H | -2.37618700 | -1.59824600 | 1.42444300  |
| C | -2.22137100 | -2.63655400 | -0.39923200 |
| C | -2.60352800 | 0.98719200  | 0.87615300  |
| C | -3.71806400 | 0.91773800  | 1.61614900  |
| H | -1.97943200 | 1.86805100  | 0.95453400  |
| C | -4.64959200 | -0.27199600 | 1.56840600  |
| H | -5.67715100 | 0.07933100  | 1.41565900  |
| H | -4.64864000 | -0.74376900 | 2.56088700  |
| C | -4.27977200 | -1.30968700 | 0.49697800  |
| H | -4.74701900 | -2.26554100 | 0.74367700  |
| H | -4.67589800 | -1.00049600 | -0.47628800 |
| C | -2.51101600 | -2.57363000 | -1.90025700 |
| H | -2.09646700 | -3.45505300 | -2.39616200 |
| H | -3.58976100 | -2.56120000 | -2.07415500 |
| H | -2.08160400 | -1.68475000 | -2.36629200 |
| C | -2.67431300 | -3.97329900 | 0.18016700  |
| H | -2.50502800 | -4.00905800 | 1.25953800  |
| H | -3.73566800 | -4.13822600 | -0.01208100 |
| H | -2.11631400 | -4.78795300 | -0.28841500 |
| C | -4.11206100 | 2.01542400  | 2.56862900  |
| H | -5.08701700 | 2.43758300  | 2.29747500  |
| H | -4.21408900 | 1.62750000  | 3.58930800  |
| H | -3.37910500 | 2.82528600  | 2.58113900  |
| C | 3.61766100  | -0.67603700 | -0.97503800 |
| H | 3.97553700  | 0.06325000  | -1.69947200 |
| H | 3.83657800  | -1.66502100 | -1.39047000 |
| C | 4.39992200  | -0.50221000 | 0.34061700  |
| H | 4.17865300  | 0.48567400  | 0.76187000  |

|   |            |             |             |
|---|------------|-------------|-------------|
| H | 4.04295900 | -1.23956300 | 1.06959000  |
| C | 5.91323200 | -0.65303800 | 0.15931000  |
| H | 6.26469600 | 0.08253300  | -0.57583500 |
| H | 6.13004800 | -1.64136700 | -0.26635700 |
| C | 6.70389900 | -0.48113200 | 1.46051600  |
| H | 6.48720700 | 0.50634900  | 1.88573200  |
| H | 6.35250300 | -1.21587800 | 2.19504600  |
| C | 8.21492500 | -0.63313100 | 1.27138900  |
| H | 8.60190900 | 0.11064700  | 0.56696000  |
| H | 8.75081600 | -0.50529300 | 2.21675100  |
| H | 8.46634800 | -1.62380800 | 0.87831000  |

### $\Delta^9$ -tetrahydrocannabinol anion Ref 32's

#### methodology

Charge=-1, Multiplicity=1

|   |             |             |             |
|---|-------------|-------------|-------------|
| C | -1.34479400 | -1.51453700 | 0.67665900  |
| C | 0.03357900  | -1.39251900 | 0.46569000  |
| C | 0.66966500  | -0.15055900 | 0.33377200  |
| C | -0.11547100 | 1.01979500  | 0.56446900  |
| C | -1.50848700 | 0.88023200  | 0.75548900  |
| C | -2.13138700 | -0.36818600 | 0.79976700  |
| H | -1.77921300 | -2.50501100 | 0.75967200  |
| H | -2.09437500 | 1.78299100  | 0.89956000  |
| O | 0.43888300  | 2.22935400  | 0.61669500  |
| O | 0.71775800  | -2.59507300 | 0.39761900  |
| C | 2.16358800  | -0.09184100 | 0.04903100  |
| H | 2.66480200  | 0.21760900  | 0.97891100  |
| C | 2.71670600  | -1.47842800 | -0.33727900 |
| H | 2.31844000  | -1.72250400 | -1.33152800 |
| C | 2.17588600  | -2.58368200 | 0.58158900  |
| C | 2.57404600  | 0.89296000  | -1.03658100 |
| C | 3.67468200  | 0.74366000  | -1.78599400 |
| H | 1.94249600  | 1.75957400  | -1.18995500 |
| C | 4.60397400  | -0.44024600 | -1.63267600 |
| H | 5.63422800  | -0.08048900 | -1.52166600 |
| H | 4.59413800  | -1.00263400 | -2.57692300 |
| C | 4.24074300  | -1.37486600 | -0.46652200 |
| H | 4.69395800  | -2.35444800 | -0.63548500 |
| H | 4.65787000  | -0.98594600 | 0.46871600  |
| C | 2.48682400  | -2.38275500 | 2.06672400  |
| H | 2.06798000  | -3.20729300 | 2.64964300  |
| H | 3.56783400  | -2.36805100 | 2.22695300  |
| H | 2.07371100  | -1.44782300 | 2.44963800  |

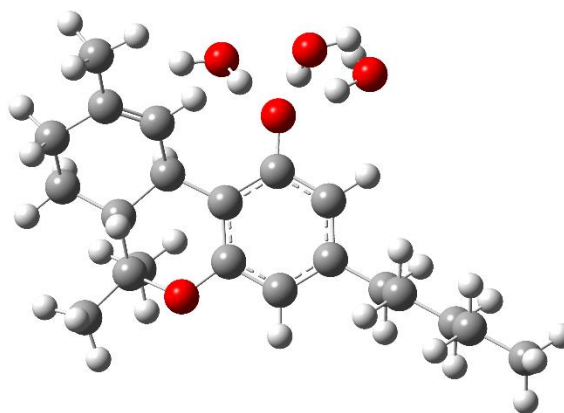

|   |             |             |             |
|---|-------------|-------------|-------------|
| C | 2.60796400  | -3.97538900 | 0.12815200  |
| H | 2.42521000  | -4.11230100 | -0.94104200 |
| H | 3.67001300  | -4.13405000 | 0.32279400  |
| H | 2.04715500  | -4.73575300 | 0.67799800  |
| C | 4.05394000  | 1.73292600  | -2.85645700 |
| H | 5.03447200  | 2.17849800  | -2.64984200 |
| H | 4.13643900  | 1.23999100  | -3.83279400 |
| H | 3.32242400  | 2.53992900  | -2.94081200 |
| C | -3.63141900 | -0.47839500 | 0.97019200  |
| H | -3.98960800 | 0.34995600  | 1.59106600  |
| H | -3.87098500 | -1.40436400 | 1.50426300  |
| C | -4.39885800 | -0.46377900 | -0.36543900 |
| H | -4.15980900 | 0.45980900  | -0.90615800 |
| H | -4.04512200 | -1.29184500 | -0.99149300 |
| C | -5.91624600 | -0.57165500 | -0.18619800 |
| H | -6.26555600 | 0.25589000  | 0.44493800  |
| H | -6.15183400 | -1.49484400 | 0.35919200  |
| C | -6.69106800 | -0.55716200 | -1.50811600 |
| H | -6.45522600 | 0.36465700  | -2.05358500 |
| H | -6.34343000 | -1.38463500 | -2.13850000 |
| C | -8.20610800 | -0.66316700 | -1.31932600 |
| H | -8.58878000 | 0.16996800  | -0.72045600 |
| H | -8.73087300 | -0.65023100 | -2.27940500 |
| H | -8.47634900 | -1.59173400 | -0.80555900 |
| H | -0.00491000 | 3.29312900  | -0.64354100 |
| O | -0.23421700 | 3.91745200  | -1.38063700 |
| H | -0.87807800 | 4.52272400  | -0.99473200 |
| O | -0.67470400 | 4.02295300  | 2.31798800  |
| H | -0.29259600 | 3.34641500  | 1.69896100  |
| H | 0.05646300  | 4.26253900  | 2.89929000  |
| O | 2.69438900  | 2.92380400  | 1.91200300  |
| H | 1.89964700  | 2.59902300  | 1.41215300  |
| H | 3.43604900  | 2.44888600  | 1.51869200  |

# cannabidiol

Charge=0, Multiplicity=1

|   |             |             |             |
|---|-------------|-------------|-------------|
| C | -1.22828000 | 0.27279800  | -1.08390200 |
| C | 0.10689400  | 0.52051600  | -0.77524500 |
| C | 0.74184400  | -0.06949300 | 0.32584700  |
| C | -0.04173900 | -0.92644500 | 1.10751900  |
| C | -1.37915500 | -1.18777000 | 0.81211100  |
| C | -1.98198400 | -0.59021200 | -0.29095700 |
| H | -1.67168000 | 0.75156300  | -1.95231900 |

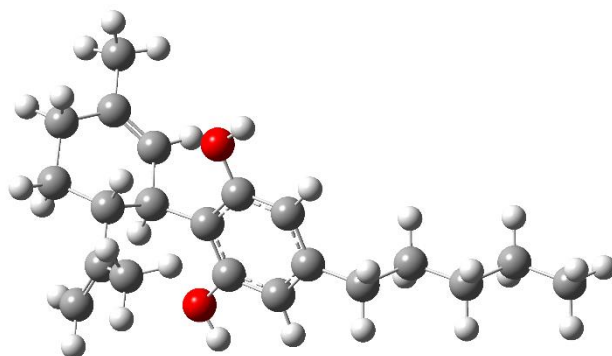

|   |             |             |             |
|---|-------------|-------------|-------------|
| H | -1.94219200 | -1.86313400 | 1.44995500  |
| O | 0.55203200  | -1.52142900 | 2.19333700  |
| H | -0.09033200 | -2.09411100 | 2.63043800  |
| C | 2.21592100  | 0.13519000  | 0.61744300  |
| H | 2.41660400  | -0.35684300 | 1.57425800  |
| C | 3.11077600  | -0.56987100 | -0.43052900 |
| H | 2.86670300  | -0.15110900 | -1.41312200 |
| C | 2.59334000  | 1.59417200  | 0.76642500  |
| C | 3.75631700  | 2.11344200  | 0.36818800  |
| H | 1.85329700  | 2.24037300  | 1.23541200  |
| C | 4.82144300  | 1.26820900  | -0.28765000 |
| H | 5.79682100  | 1.53802900  | 0.13136000  |
| H | 4.86874700  | 1.53294000  | -1.35220300 |
| C | 4.57338800  | -0.23018900 | -0.12753700 |
| H | 5.23402700  | -0.79633500 | -0.78933400 |
| H | 4.80552700  | -0.53172400 | 0.89952300  |
| C | 2.02768500  | -2.54067500 | -1.65686800 |
| H | 1.07054100  | -2.00998700 | -1.71253200 |
| H | 2.56256300  | -2.32360000 | -2.58732400 |
| H | 1.83365100  | -3.61337500 | -1.60526400 |
| C | 4.08042900  | 3.57261300  | 0.51929000  |
| H | 4.96299500  | 3.70941100  | 1.15222100  |
| H | 4.31957100  | 4.01221100  | -0.45492600 |
| H | 3.24864000  | 4.12814500  | 0.95578200  |
| C | -3.44116300 | -0.82147900 | -0.58784500 |
| H | -3.73671300 | -1.81010100 | -0.22458500 |
| H | -3.60170100 | -0.80646400 | -1.67007200 |
| C | -4.33343500 | 0.24156200  | 0.06489900  |
| H | -4.16701900 | 0.23280800  | 1.14822400  |
| H | -4.03143300 | 1.23207100  | -0.29417900 |
| C | -5.81406600 | 0.02019400  | -0.22812900 |
| H | -6.11030000 | -0.97323900 | 0.13000100  |
| H | -5.97282000 | 0.02103400  | -1.31337700 |
| C | -6.71238200 | 1.07506800  | 0.41278800  |
| H | -6.55158600 | 1.07336500  | 1.49628700  |
| H | -6.41400000 | 2.06619000  | 0.05438000  |
| C | -8.18992700 | 0.84256300  | 0.11164300  |
| H | -8.51374100 | -0.13298500 | 0.48510400  |
| H | -8.81978400 | 1.60507400  | 0.57549500  |
| H | -8.37468000 | 0.86450600  | -0.96604300 |
| C | 2.82361100  | -2.06062400 | -0.47504500 |
| C | 3.23203900  | -2.89004100 | 0.48595200  |
| H | 3.79956000  | -2.53921800 | 1.34276600  |

|   |            |             |             |
|---|------------|-------------|-------------|
| H | 3.00105700 | -3.95007300 | 0.44757400  |
| O | 0.85803900 | 1.35088900  | -1.56602500 |
| H | 0.30777200 | 1.69173300  | -2.28238700 |

# **cannabidiol anion C1' (anion 2)**

Charge=-1, Multiplicity=1

|   |             |             |             |
|---|-------------|-------------|-------------|
| C | -1.19743600 | 0.20959900  | -1.21860600 |
| C | 0.17355200  | 0.49305800  | -0.95895800 |
| C | 0.73699300  | -0.01922400 | 0.25510700  |
| C | -0.08402500 | -0.76154600 | 1.10658300  |
| C | -1.42498000 | -1.03098900 | 0.82754900  |
| C | -1.98474800 | -0.53778700 | -0.35351500 |
| H | -1.62332400 | 0.59347400  | -2.14213100 |
| H | -2.01671100 | -1.61639000 | 1.52545800  |
| O | 0.46976300  | -1.25106500 | 2.27836900  |
| H | -0.21093500 | -1.73506000 | 2.76084900  |
| C | 2.20712800  | 0.16921600  | 0.58174700  |
| H | 2.37352300  | -0.27265700 | 1.56955600  |
| C | 3.13578700  | -0.60357900 | -0.38652800 |
| H | 2.94759800  | -0.22774800 | -1.39741900 |
| C | 2.61661000  | 1.62509800  | 0.67299100  |
| C | 3.81013400  | 2.10022500  | 0.30936000  |
| H | 1.87101000  | 2.31245900  | 1.07038900  |
| C | 4.88540000  | 1.19942600  | -0.24970800 |
| H | 5.84577000  | 1.46697600  | 0.20465400  |
| H | 4.99283900  | 1.40951100  | -1.32220600 |
| C | 4.59138200  | -0.28365100 | -0.03061900 |
| H | 5.26967400  | -0.89567200 | -0.63149800 |
| H | 4.76829800  | -0.53952700 | 1.01985000  |
| C | 2.05983000  | -2.60141400 | -1.57025500 |
| H | 1.12057800  | -2.04957100 | -1.68836400 |
| H | 2.63891500  | -2.43768800 | -2.48508400 |
| H | 1.83632400  | -3.66610000 | -1.48172600 |
| C | 4.16233500  | 3.55820200  | 0.40254000  |
| H | 5.01581300  | 3.70942200  | 1.07141300  |
| H | 4.45912100  | 3.94308600  | -0.57908700 |
| H | 3.32373900  | 4.15342300  | 0.76832600  |
| C | -3.44766300 | -0.76974700 | -0.64615400 |
| H | -3.73562900 | -1.77321400 | -0.31571500 |
| H | -3.61840400 | -0.72037600 | -1.72596900 |
| C | -4.34982200 | 0.25730700  | 0.04892800  |
| H | -4.17750300 | 0.21331300  | 1.13047600  |
| H | -4.06230100 | 1.26391000  | -0.27628500 |

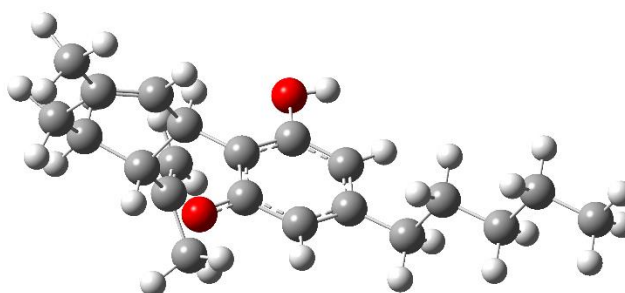



|   |             |             |             |
|---|-------------|-------------|-------------|
| C | -5.83044100 | 0.02978900  | -0.24073000 |
| H | -6.11174200 | -0.98042800 | 0.08116100  |
| H | -5.99874000 | 0.06988400  | -1.32387700 |
| C | -6.73724500 | 1.04734800  | 0.44700500  |
| H | -6.56648400 | 1.00734800  | 1.52828900  |
| H | -6.45549200 | 2.05531800  | 0.12378800  |
| C | -8.21445400 | 0.80637200  | 0.15065300  |
| H | -8.52192000 | -0.18659400 | 0.49060600  |
| H | -8.85004300 | 1.54265600  | 0.64794100  |
| H | -8.40967100 | 0.86553200  | -0.92379000 |
| C | 2.81615900  | -2.08737400 | -0.37678600 |
| C | 3.16222800  | -2.88429100 | 0.63565000  |
| H | 3.70190100  | -2.50976800 | 1.50049300  |
| H | 2.90663000  | -3.93944600 | 0.63256700  |
| O | 0.87608900  | 1.18202700  | -1.81214300 |

#### cannabidiol anion C3' (anion 1)

Charge=-1, Multiplicity=1

|   |             |             |             |
|---|-------------|-------------|-------------|
| C | -1.21674500 | 0.17284600  | -1.13129600 |
| C | 0.12131600  | 0.42071100  | -0.81970900 |
| C | 0.73599100  | -0.06721600 | 0.33336800  |
| C | -0.04618300 | -0.84768300 | 1.24816700  |
| C | -1.40518800 | -1.09374600 | 0.90433400  |
| C | -1.98468700 | -0.59996400 | -0.25668800 |
| H | -1.64249700 | 0.57360200  | -2.04669400 |
| H | -1.99821000 | -1.69351900 | 1.59003700  |
| O | 0.45311000  | -1.32374500 | 2.35343400  |
| C | 2.21077200  | 0.15170300  | 0.60938900  |
| H | 2.39281400  | -0.30305200 | 1.58889800  |
| C | 3.12528800  | -0.59755700 | -0.38829900 |
| H | 2.91667600  | -0.21058900 | -1.39127400 |
| C | 2.60302100  | 1.61112900  | 0.70464500  |
| C | 3.78269900  | 2.10338300  | 0.31833300  |
| H | 1.85831800  | 2.28710500  | 1.12274100  |
| C | 4.85981900  | 1.21964400  | -0.26473100 |
| H | 5.82286300  | 1.49315100  | 0.18034000  |
| H | 4.95167800  | 1.44283700  | -1.33601300 |
| C | 4.58528000  | -0.26937000 | -0.05888800 |
| H | 5.25665100  | -0.86653700 | -0.68217200 |
| H | 4.78483200  | -0.53913500 | 0.98397000  |
| C | 2.10084500  | -2.60064200 | -1.60888200 |
| H | 1.15630400  | -2.06158000 | -1.74438800 |
| H | 2.69843800  | -2.42136700 | -2.50885700 |

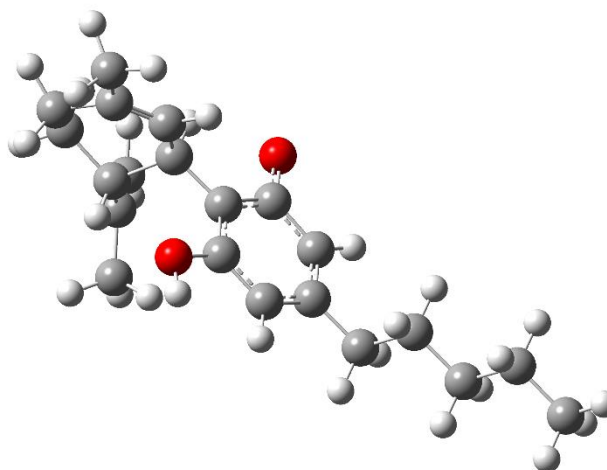

|   |             |             |             |
|---|-------------|-------------|-------------|
| H | 1.89033300  | -3.66893700 | -1.53368900 |
| C | 4.11899400  | 3.56496100  | 0.41456100  |
| H | 4.98264200  | 3.72192500  | 1.06887100  |
| H | 4.39329200  | 3.96013500  | -0.56951100 |
| H | 3.28029100  | 4.14748400  | 0.80000000  |
| C | -3.44720000 | -0.83960000 | -0.54531100 |
| H | -3.74526500 | -1.81519900 | -0.14850500 |
| H | -3.61034200 | -0.86352600 | -1.62757200 |
| C | -4.34584600 | 0.24088500  | 0.06864400  |
| H | -4.18615900 | 0.26518500  | 1.15276400  |
| H | -4.04383600 | 1.22135100  | -0.31757300 |
| C | -5.82525700 | 0.00996500  | -0.22448300 |
| H | -6.11992700 | -0.97689000 | 0.15301900  |
| H | -5.98081700 | -0.01243600 | -1.31007900 |
| C | -6.73018000 | 1.07414300  | 0.39140500  |
| H | -6.57506900 | 1.09317600  | 1.47558000  |
| H | -6.43279300 | 2.05940600  | 0.01626300  |
| C | -8.20561300 | 0.83194800  | 0.08725100  |
| H | -8.52811700 | -0.13821300 | 0.47565600  |
| H | -8.84033700 | 1.60006300  | 0.53501500  |
| H | -8.38528100 | 0.83489600  | -0.99153500 |
| C | 2.82021600  | -2.08469200 | -0.39376000 |
| C | 3.14695900  | -2.88039100 | 0.62551300  |
| H | 3.65697600  | -2.50049800 | 1.50598400  |
| H | 2.90405500  | -3.93843800 | 0.61336200  |
| O | 0.89318900  | 1.16746600  | -1.69062200 |
| H | 0.34629300  | 1.43709400  | -2.43850900 |

## 2-nitrophenol Ref 32's methodology

Charge=0, Multiplicity=1

|   |             |             |             |
|---|-------------|-------------|-------------|
| C | -1.91198000 | 2.37366200  | 0.01941500  |
| C | -2.91753700 | 1.40086200  | 0.07082400  |
| C | -2.56407300 | 0.06542600  | 0.08260300  |
| C | -1.21303400 | -0.30704100 | 0.06325800  |
| C | -0.18827100 | 0.66470900  | 0.01202900  |
| C | -0.57435600 | 2.01289800  | -0.01402400 |
| H | -2.17530600 | 3.42486700  | 0.00528200  |
| H | -3.96102900 | 1.68646800  | 0.10389400  |
| H | -3.31661400 | -0.70963500 | 0.12589900  |
| H | 0.19885800  | 2.76988700  | -0.06368000 |
| O | 1.11045300  | 0.30962300  | -0.04156300 |
| H | 1.71106100  | 1.10213700  | -0.13705700 |
| N | -0.91899800 | -1.72818100 | 0.08712700  |

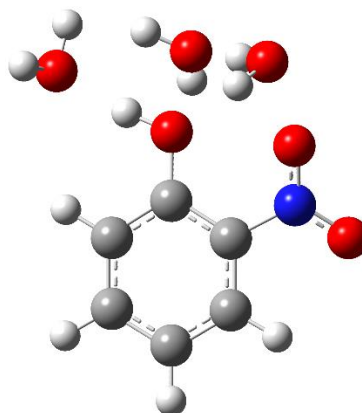

|   |             |             |             |
|---|-------------|-------------|-------------|
| O | 0.18775600  | -2.11035800 | 0.46885800  |
| O | -1.80466000 | -2.51316900 | -0.26768200 |
| O | 2.86961600  | 2.29174000  | -0.33436000 |
| H | 3.69655200  | 1.91122100  | -0.66000600 |
| H | 3.10317700  | 2.71530400  | 0.50270100  |
| O | 2.44378800  | -1.00126600 | 2.27088200  |
| H | 1.92101100  | -0.70017100 | 1.50942400  |
| H | 3.03716700  | -0.26533300 | 2.46348300  |
| O | 2.00675100  | -1.40924800 | -2.27109200 |
| H | 1.68428100  | -0.88177200 | -1.52164600 |
| H | 2.23971100  | -0.75737800 | -2.94315300 |

### 2-nitrophenol anion Ref 32's methodology

Charge=-1, Multiplicity=1

|   |             |             |             |
|---|-------------|-------------|-------------|
| C | -1.76611200 | 2.44812200  | 0.06824600  |
| C | -2.83693300 | 1.52919100  | 0.01658400  |
| C | -2.55986700 | 0.18406100  | -0.02097900 |
| C | -1.22649200 | -0.28337700 | 0.00733000  |
| C | -0.10815200 | 0.62631300  | 0.05820000  |
| C | -0.46237600 | 2.01345000  | 0.08487600  |
| H | -1.97381500 | 3.51262800  | 0.09655000  |
| H | -3.86222200 | 1.87696300  | 0.01101700  |
| H | -3.36035600 | -0.54141300 | -0.05710000 |
| H | 0.35672500  | 2.72278200  | 0.12080300  |
| O | 1.13454500  | 0.28150900  | 0.06076200  |
| N | -1.04211400 | -1.69964900 | -0.04226600 |
| O | 0.07148300  | -2.19701400 | 0.18718200  |
| O | -2.02064600 | -2.42688200 | -0.31341900 |
| H | 2.40966900  | 1.48866700  | -0.14192500 |
| O | 3.18458400  | 2.08211100  | -0.28192700 |
| H | 2.89744300  | 2.94073500  | 0.05027400  |
| O | 2.32376200  | -0.99901500 | 2.22001300  |
| H | 1.87123400  | -0.58354200 | 1.45471800  |
| H | 2.03760600  | -1.91989400 | 2.19016900  |
| O | 2.29091300  | -1.17263500 | -2.01094200 |
| H | 1.85123300  | -0.70225800 | -1.27033500 |
| H | 2.94973800  | -0.54827400 | -2.33719400 |

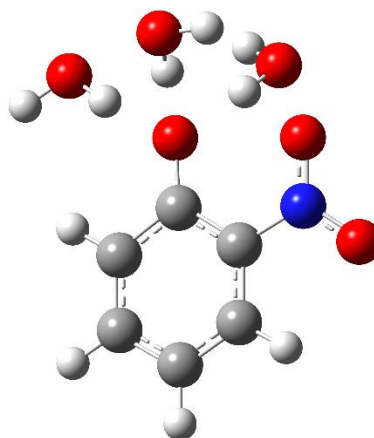

Cartesian coordinates of the optimized acids and conjugate bases of the antioxidants studied at the M06–2X(SMD)/6–311++G(d,p) level of theory in water at 298.15 K.

**o-butylated hydroxyanisole**

Charge=0, Multiplicity=1

|   |             |             |             |
|---|-------------|-------------|-------------|
| C | -2.02076000 | 1.11864100  | 0.00002200  |
| C | -1.85708200 | -0.25874100 | 0.00000000  |
| C | -0.57345200 | -0.80936600 | 0.00000600  |
| C | 0.57913700  | -0.02734200 | 0.00000000  |
| C | 0.39342600  | 1.37161800  | -0.00000400 |
| C | -0.88019600 | 1.92087600  | 0.00002200  |
| H | -2.99807900 | 1.58184300  | 0.00004100  |
| H | -0.50543800 | -1.88947800 | 0.00001400  |
| H | -0.98419400 | 3.00140800  | 0.00003900  |
| O | 1.49477100  | 2.19802900  | -0.00003100 |
| H | 1.19654000  | 3.11575900  | -0.00006500 |
| O | -2.89310300 | -1.16131500 | -0.00005600 |
| C | -4.21108800 | -0.62826300 | 0.00001500  |
| H | -4.88283300 | -1.48403200 | 0.00002400  |
| H | -4.38815700 | -0.02408800 | 0.89369700  |
| H | -4.38825400 | -0.02405200 | -0.89362200 |
| C | 1.97418200  | -0.66387000 | 0.00000500  |
| C | 1.89885300  | -2.19480800 | 0.00005400  |
| H | 1.38824500  | -2.57697300 | 0.88773000  |
| H | 1.38823200  | -2.57703000 | -0.88759000 |
| H | 2.91564500  | -2.59479700 | 0.00005800  |
| C | 2.74648100  | -0.24170600 | -1.26190800 |
| H | 2.89648100  | 0.83614100  | -1.31068900 |
| H | 3.72785500  | -0.72477000 | -1.26503700 |
| H | 2.21003500  | -0.55888200 | -2.16068900 |
| C | 2.74651300  | -0.24163000 | 1.26187200  |
| H | 3.72785800  | -0.72475100 | 1.26504100  |
| H | 2.89657700  | 0.83621300  | 1.31055000  |
| H | 2.21005600  | -0.55868900 | 2.16068700  |

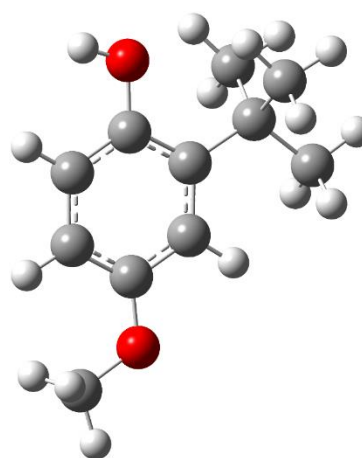

**o-butylated hydroxyanisole anion**

Charge=-1, Multiplicity=1

|   |             |             |             |
|---|-------------|-------------|-------------|
| C | -1.95652600 | 1.41210000  | -0.19376600 |
| C | -1.89993100 | 0.03439900  | -0.33104800 |
| C | -0.67155700 | -0.61744800 | -0.26629800 |
| C | 0.53211500  | 0.06229700  | -0.06830800 |
| C | 0.50020200  | 1.49642700  | 0.07482700  |
| C | -0.77629000 | 2.11797300  | 0.00116000  |
| H | -2.91304100 | 1.92331500  | -0.24294300 |
| H | -0.68266600 | -1.69559500 | -0.37951800 |
| H | -0.80571700 | 3.19856200  | 0.10442200  |
| O | 1.56578000  | 2.22527400  | 0.26294200  |
| O | -3.06620200 | -0.70354900 | -0.54914000 |
| C | -3.63730800 | -1.20005600 | 0.65997500  |
| H | -4.53440300 | -1.75646400 | 0.38916800  |
| H | -2.93566400 | -1.86514800 | 1.17232000  |
| H | -3.90552600 | -0.37329400 | 1.32464800  |
| C | 1.85950800  | -0.70445100 | -0.00201000 |
| C | 1.66949100  | -2.21436900 | -0.19320500 |
| H | 1.03132600  | -2.64704300 | 0.58212300  |
| H | 1.23563700  | -2.45012700 | -1.16892500 |
| H | 2.64519500  | -2.70412000 | -0.13385600 |
| C | 2.81085200  | -0.22658500 | -1.11314400 |
| H | 3.04339200  | 0.83310000  | -1.01711700 |
| H | 3.74689400  | -0.79235900 | -1.06842500 |
| H | 2.36171500  | -0.39583600 | -2.09652700 |
| C | 2.51535000  | -0.50315300 | 1.37535800  |
| H | 3.47057800  | -1.03642400 | 1.41507400  |
| H | 2.69846500  | 0.55013200  | 1.58428500  |
| H | 1.87176100  | -0.90530200 | 2.16361000  |

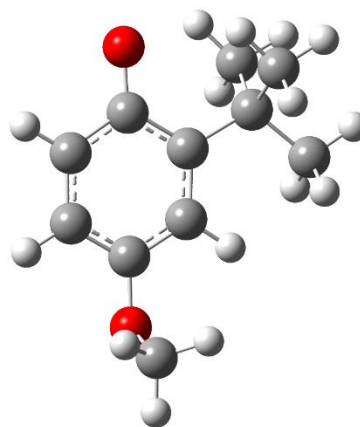**m-butylated hydroxyanisole**

Charge=0, Multiplicity=1

|   |             |             |             |
|---|-------------|-------------|-------------|
| C | -1.26939500 | 1.65578800  | -0.00000900 |
| C | -0.02163000 | 1.03597100  | -0.00001200 |
| C | 0.08209100  | -0.37467000 | 0.00002000  |
| C | -1.11080400 | -1.09816700 | 0.00004100  |
| C | -2.35680800 | -0.47398200 | 0.00004400  |
| C | -2.44247100 | 0.90539000  | 0.00002100  |
| H | -1.34749600 | 2.73419400  | -0.00003600 |
| H | -3.41054400 | 1.39193100  | 0.00002200  |
| O | -3.53008800 | -1.19937500 | 0.00007200  |
| H | -3.32468300 | -2.14199100 | 0.00007900  |

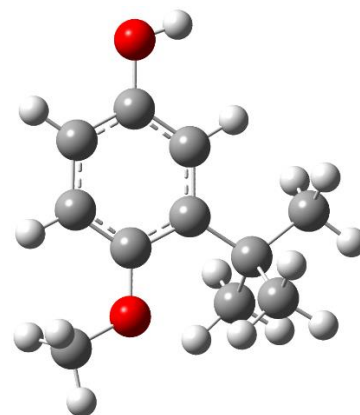

|   |             |             |             |
|---|-------------|-------------|-------------|
| O | 1.14346400  | 1.75700300  | -0.00006500 |
| C | 1.05209500  | 3.17484300  | -0.00011500 |
| H | 0.53745300  | 3.53705600  | 0.89384000  |
| H | 2.07764600  | 3.53854600  | -0.00015400 |
| H | 0.53740700  | 3.53699000  | -0.89406900 |
| H | -1.09379600 | -2.18134500 | 0.00006100  |
| C | 1.43902300  | -1.09299900 | 0.00001200  |
| C | 1.27418200  | -2.61773800 | -0.00019000 |
| H | 0.74318200  | -2.97062000 | 0.88769900  |
| H | 0.74332200  | -2.97040000 | -0.88825000 |
| H | 2.26642700  | -3.07511200 | -0.00017000 |
| C | 2.23701600  | -0.72299400 | -1.26282800 |
| H | 2.45667500  | 0.34236700  | -1.31317000 |
| H | 3.18432600  | -1.26989000 | -1.26538400 |
| H | 1.68079100  | -1.00635200 | -2.16093000 |
| C | 2.23687200  | -0.72332200 | 1.26304100  |
| H | 3.18416600  | -1.27024500 | 1.26557800  |
| H | 2.45655500  | 0.34201900  | 1.31367300  |
| H | 1.68053000  | -1.00688700 | 2.16100500  |

# **m-butylated hydroxyanisole anion**

Charge=-1, Multiplicity=1

|   |             |             |             |
|---|-------------|-------------|-------------|
| C | -1.40955100 | 1.54084400  | 0.00004800  |
| C | -0.12049300 | 1.01643600  | 0.00006100  |
| C | 0.06975700  | -0.38535100 | -0.00003700 |
| C | -1.07213400 | -1.18506300 | -0.00013100 |
| C | -2.40462100 | -0.68962400 | -0.00014800 |
| C | -2.53222700 | 0.71242000  | -0.00005800 |
| H | -1.56095600 | 2.61298600  | 0.00012400  |
| H | -3.52406600 | 1.15377900  | -0.00006500 |
| O | -3.43792100 | -1.50372900 | -0.00024600 |
| O | 1.00298800  | 1.82460600  | 0.00018600  |
| C | 0.80109000  | 3.22698300  | 0.00029600  |
| H | 0.25838500  | 3.55150500  | 0.89320200  |
| H | 1.79393900  | 3.67409000  | 0.00038300  |
| H | 0.25847300  | 3.55165800  | -0.89260700 |
| H | -0.97013100 | -2.26359100 | -0.00020300 |
| C | 1.47333300  | -1.01313600 | -0.00002300 |
| C | 1.41715900  | -2.54614100 | 0.00013700  |
| H | 0.91139000  | -2.93572900 | 0.88719400  |
| H | 0.91130600  | -2.93590900 | -0.88679400 |
| H | 2.43924500  | -2.93342800 | 0.00012800  |
| C | 2.24672400  | -0.59231700 | -1.26228800 |

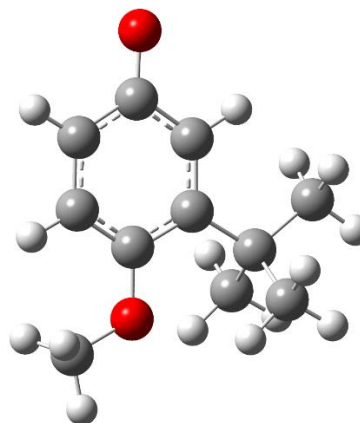

|   |            |             |             |
|---|------------|-------------|-------------|
| H | 2.39088100 | 0.48587400  | -1.31554000 |
| H | 3.23058100 | -1.07129700 | -1.26543000 |
| H | 1.71181100 | -0.91526400 | -2.16028500 |
| C | 2.24680200 | -0.59205100 | 1.26210500  |
| H | 3.23067000 | -1.07101000 | 1.26527600  |
| H | 2.39094100 | 0.48615600  | 1.31512700  |
| H | 1.71195700 | -0.91482600 | 2.16020400  |

# **tocol**

Charge=0, Multiplicity=1

|   |             |             |             |
|---|-------------|-------------|-------------|
| C | 0.12301300  | -0.63979000 | -0.15500500 |
| C | 0.47708800  | 0.71189500  | -0.09792700 |
| C | 2.80704000  | 0.05733500  | 0.03063700  |
| O | 4.12318500  | 0.45925500  | 0.11964700  |
| H | 4.69711300  | -0.31663200 | 0.11077400  |
| C | -0.58256500 | 1.78507500  | -0.13757700 |
| H | -0.70773800 | 2.20535300  | 0.86564800  |
| H | -0.24916800 | 2.60302900  | -0.77976300 |
| C | -1.90494000 | 1.21376600  | -0.63840600 |
| H | -1.85092600 | 1.03463500  | -1.71680400 |
| H | -2.72364900 | 1.91293100  | -0.45583000 |
| C | -2.22557300 | -0.11605400 | 0.04282800  |
| C | -3.49655200 | -0.72299900 | -0.52272900 |
| H | -3.67012000 | -1.71147300 | -0.09124000 |
| H | -4.34886500 | -0.08438800 | -0.28163400 |
| H | -3.42512600 | -0.81751800 | -1.60860200 |
| C | -2.31151300 | 0.01177500  | 1.56022900  |
| H | -3.06092600 | 0.76059200  | 1.82749800  |
| H | -2.60297400 | -0.94595000 | 1.99709300  |
| H | -1.35533200 | 0.31163600  | 1.99476200  |
| O | -1.17920600 | -1.06933800 | -0.28142000 |
| C | 1.10451500  | -1.62859800 | -0.12051200 |
| H | 0.80322000  | -2.66876100 | -0.16810200 |
| C | 2.44657200  | -1.28675500 | -0.03013900 |
| H | 3.21235000  | -2.05485000 | -0.00543500 |
| C | 1.83029400  | 1.04208500  | -0.00328500 |
| H | 2.12603100  | 2.08565100  | 0.03712700  |

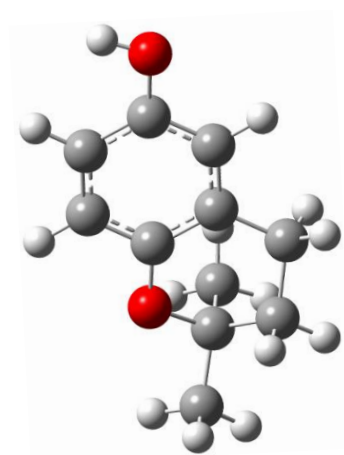

**tocol anion**

Charge=-1, Multiplicity=1

|   |             |             |             |
|---|-------------|-------------|-------------|
| C | 0.16438300  | -0.63849900 | -0.17869300 |
| C | 0.52621500  | 0.70827700  | -0.11642700 |
| C | 2.91320200  | 0.07330900  | 0.04244200  |
| O | 4.18098700  | 0.40081400  | 0.14795400  |
| C | -0.53532300 | 1.78378800  | -0.14489500 |
| H | -0.64631400 | 2.20659200  | 0.85938300  |
| H | -0.21247700 | 2.60254100  | -0.79213100 |
| C | -1.87026100 | 1.22026400  | -0.62358500 |
| H | -1.83991300 | 1.05160700  | -1.70484700 |
| H | -2.68389200 | 1.91965800  | -0.41802800 |
| C | -2.17985200 | -0.11858400 | 0.04782200  |
| C | -3.47173400 | -0.70773700 | -0.49073600 |
| H | -3.64135100 | -1.70094600 | -0.06817200 |
| H | -4.31328200 | -0.06700200 | -0.21899900 |
| H | -3.43063400 | -0.78906400 | -1.57936300 |
| C | -2.23056400 | -0.00685500 | 1.56916800  |
| H | -2.97242100 | 0.73944600  | 1.86364000  |
| H | -2.51320000 | -0.96917400 | 2.00228300  |
| H | -1.26390300 | 0.28673000  | 1.98392600  |
| O | -1.15079500 | -1.06752800 | -0.31960700 |
| C | 1.15019600  | -1.62284900 | -0.13474300 |
| H | 0.84906400  | -2.66460600 | -0.18603500 |
| C | 2.49106600  | -1.28139700 | -0.03161400 |
| H | 3.24593400  | -2.06107600 | -0.00082300 |
| C | 1.88012900  | 1.03854900  | -0.00692800 |
| H | 2.15611700  | 2.08940000  | 0.04151600  |

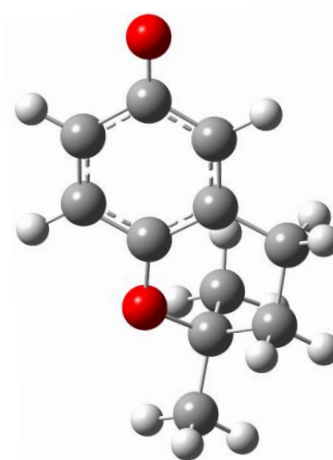 **$\delta$ -tocopherol**

Charge=0, Multiplicity=1

|   |             |             |             |
|---|-------------|-------------|-------------|
| C | -0.09658900 | 0.38709300  | -0.12317600 |
| C | -0.38532700 | -0.97899700 | -0.10959400 |
| C | -2.73599800 | -0.44529300 | 0.04021400  |
| O | -4.03565000 | -0.90288800 | 0.11722200  |
| H | -4.63949900 | -0.15011900 | 0.12121500  |
| C | 0.72461900  | -1.99861600 | -0.18774700 |
| H | 0.87547800  | -2.44521100 | 0.80052600  |
| H | 0.42617900  | -2.81041300 | -0.85455700 |
| C | 2.01600900  | -1.35133000 | -0.67531300 |
| H | 1.94692500  | -1.13740800 | -1.74653400 |
| H | 2.86729500  | -2.01771400 | -0.52095000 |
| C | 2.27720700  | -0.03284300 | 0.05102800  |

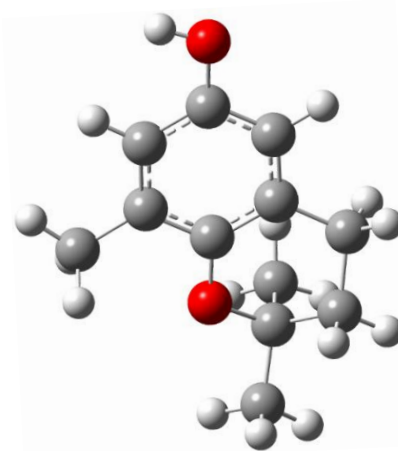



|   |             |             |             |
|---|-------------|-------------|-------------|
| C | 3.51377900  | 0.65490000  | -0.49816900 |
| H | 3.64234400  | 1.63434400  | -0.03169000 |
| H | 4.39740300  | 0.04990300  | -0.28443600 |
| H | 3.43087700  | 0.78507400  | -1.57955000 |
| C | 2.38001100  | -0.21030800 | 1.56255600  |
| H | 3.16362800  | -0.93415600 | 1.79892500  |
| H | 2.63230100  | 0.74353300  | 2.03121700  |
| H | 1.44084600  | -0.56689500 | 1.99122300  |
| O | 1.18459100  | 0.87936800  | -0.23206400 |
| C | -1.11770000 | 1.34699000  | -0.06128500 |
| C | -2.43732700 | 0.91541200  | 0.02042200  |
| H | -3.24245100 | 1.64270200  | 0.06828900  |
| C | -0.77401600 | 2.80985400  | -0.08883600 |
| H | -0.11234300 | 3.07110000  | 0.74097000  |
| H | -0.24948000 | 3.07172800  | -1.01144200 |
| H | -1.67708300 | 3.41632600  | -0.01927800 |
| C | -1.71973100 | -1.38405500 | -0.02460900 |
| H | -1.96355700 | -2.44146700 | -0.01814800 |

# **$\delta$ -tocopherol anion**

Charge=-1, Multiplicity=1

|   |             |             |             |
|---|-------------|-------------|-------------|
| C | -0.13564500 | 0.38426600  | -0.14384300 |
| C | -0.42428600 | -0.97977000 | -0.12883600 |
| C | -2.83445600 | -0.48493100 | 0.05170700  |
| O | -4.08544300 | -0.88026300 | 0.14713100  |
| C | 0.69260400  | -1.99596900 | -0.20049300 |
| H | 0.83223600  | -2.44907900 | 0.78689300  |
| H | 0.40795400  | -2.80650000 | -0.87557200 |
| C | 1.99326700  | -1.34827200 | -0.66463300 |
| H | 1.94658700  | -1.14020900 | -1.73850700 |
| H | 2.84334000  | -2.01203700 | -0.49016900 |
| C | 2.23609000  | -0.02218700 | 0.05686700  |
| C | 3.49082000  | 0.65605500  | -0.46422900 |
| H | 3.61161400  | 1.63857800  | -0.00164800 |
| H | 4.36696100  | 0.04981100  | -0.22425600 |
| H | 3.43695600  | 0.77984200  | -1.54834700 |
| C | 2.30474000  | -0.19036000 | 1.57248600  |
| H | 3.08571400  | -0.90900600 | 1.83294100  |
| H | 2.54211400  | 0.76764300  | 2.04103800  |
| H | 1.35732300  | -0.54820200 | 1.98107500  |
| O | 1.15601800  | 0.88406100  | -0.26608900 |
| C | -1.16717600 | 1.33144900  | -0.06970900 |
| C | -2.48287400 | 0.89147300  | 0.02274900  |

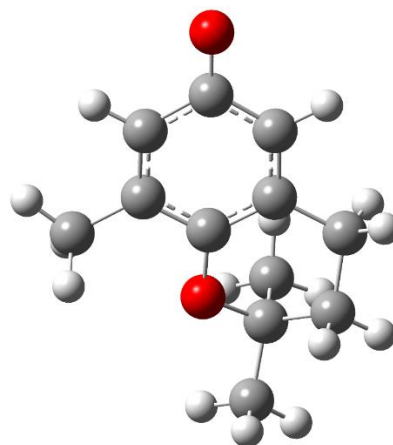

|   |             |             |             |
|---|-------------|-------------|-------------|
| H | -3.28129100 | 1.62696600  | 0.07833400  |
| C | -0.83484700 | 2.79993900  | -0.09625600 |
| H | -0.17064100 | 3.06880400  | 0.72969200  |
| H | -0.31918700 | 3.07319600  | -1.02099300 |
| H | -1.74266000 | 3.39922600  | -0.01870800 |
| C | -1.75631300 | -1.39342700 | -0.02948200 |
| H | -1.97316100 | -2.45901900 | -0.01807600 |

### $\beta$ -tocopherol

Charge=0, Multiplicity=1

|   |             |             |             |
|---|-------------|-------------|-------------|
| C | 0.14376600  | 0.58871600  | -0.14516100 |
| C | -0.35182700 | -0.71680800 | -0.13538400 |
| C | -2.58324400 | 0.16713300  | 0.04235000  |
| O | -3.94386900 | -0.05768700 | 0.13686200  |
| H | -4.40035200 | 0.78990700  | 0.20174200  |
| C | 0.59510800  | -1.88880900 | -0.23826300 |
| H | 0.64860000  | -2.39798800 | 0.73083500  |
| H | 0.19655600  | -2.62081300 | -0.94505100 |
| C | 1.98416500  | -1.44157400 | -0.68042400 |
| H | 1.98017500  | -1.21170200 | -1.75050400 |
| H | 2.71677900  | -2.23383500 | -0.51213300 |
| C | 2.42247400  | -0.18412600 | 0.06467300  |
| C | 3.76437100  | 0.31242500  | -0.44150400 |
| H | 4.02669200  | 1.25683900  | 0.04104200  |
| H | 4.53967900  | -0.42158800 | -0.21220200 |
| H | 3.73328200  | 0.46332100  | -1.52290400 |
| C | 2.45173600  | -0.38271000 | 1.57689100  |
| H | 3.12232200  | -1.20768300 | 1.82900500  |
| H | 2.81639100  | 0.52491000  | 2.06320400  |
| H | 1.46030100  | -0.61205000 | 1.97340500  |
| O | 1.48723500  | 0.87857800  | -0.24749200 |
| C | -0.71090500 | 1.69648500  | -0.07737000 |
| C | -2.07725700 | 1.46454800  | 0.01063000  |
| H | -2.76349100 | 2.30498600  | 0.06183400  |
| C | -1.73665300 | -0.93669100 | -0.02269600 |
| C | -2.28199600 | -2.33981400 | 0.01170000  |
| H | -2.21313000 | -2.81227200 | -0.97323500 |
| H | -1.71446500 | -2.96134600 | 0.70801000  |
| H | -3.32655900 | -2.35074700 | 0.31721500  |
| C | -0.14860600 | 3.09031400  | -0.09996400 |
| H | 0.54668500  | 3.24584300  | 0.72896600  |
| H | 0.40668900  | 3.27675400  | -1.02295700 |
| H | -0.94987100 | 3.82580100  | -0.02409600 |

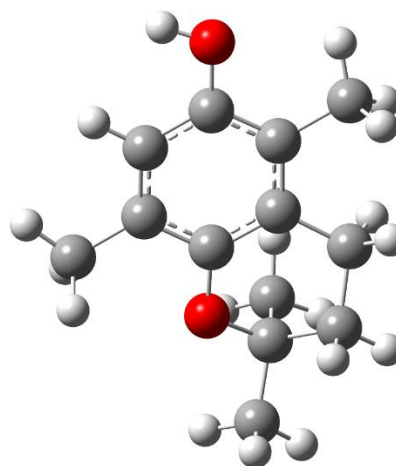

# **$\beta$ -tocopherol anion**

Charge=-1, Multiplicity=1

|   |             |             |             |
|---|-------------|-------------|-------------|
| C | 0.11250400  | 0.59395100  | -0.15307300 |
| C | -0.39819100 | -0.70635800 | -0.13891700 |
| C | -2.68373100 | 0.18048300  | 0.04916800  |
| O | -3.98836900 | 0.02042400  | 0.13407700  |
| C | 0.54615800  | -1.88474700 | -0.24047200 |
| H | 0.59448200  | -2.39597800 | 0.72821400  |
| H | 0.14819300  | -2.61640800 | -0.94835600 |
| C | 1.94293000  | -1.45246000 | -0.67469900 |
| H | 1.95011200  | -1.23013100 | -1.74667700 |
| H | 2.66778600  | -2.25025300 | -0.49607100 |
| C | 2.38622000  | -0.19083300 | 0.06213300  |
| C | 3.74268000  | 0.27982300  | -0.43216600 |
| H | 4.01326000  | 1.22602100  | 0.04265600  |
| H | 4.50522400  | -0.46221900 | -0.18583300 |
| H | 3.72744300  | 0.41954600  | -1.51558200 |
| C | 2.40015700  | -0.37787300 | 1.57701000  |
| H | 3.05969700  | -1.20740600 | 1.84358400  |
| H | 2.76984200  | 0.53008200  | 2.05944500  |
| H | 1.40256400  | -0.59305300 | 1.96559100  |
| O | 1.47016100  | 0.87411000  | -0.27569400 |
| C | -0.73950500 | 1.69983100  | -0.07243300 |
| C | -2.10838400 | 1.47561800  | 0.02151200  |
| H | -2.77893200 | 2.32945400  | 0.07734700  |
| C | -1.78230700 | -0.91802400 | -0.01671000 |
| C | -2.32302300 | -2.32491900 | 0.02733100  |
| H | -2.38755200 | -2.76962100 | -0.97290500 |
| H | -1.69178700 | -2.98231500 | 0.62962100  |
| H | -3.32650400 | -2.33458700 | 0.45167500  |
| C | -0.17051700 | 3.09420600  | -0.09281900 |
| H | 0.53665100  | 3.24557700  | 0.72733600  |
| H | 0.37307800  | 3.28993800  | -1.02140900 |
| H | -0.96783500 | 3.83289000  | -0.00088900 |

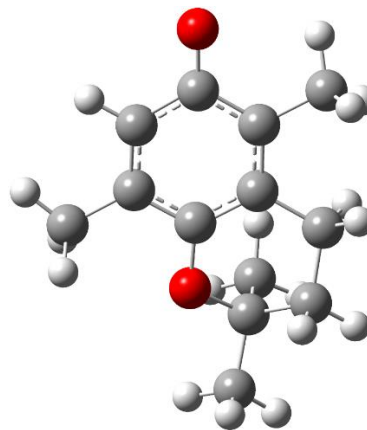

# $\gamma$ -tocopherol

Charge=0, Multiplicity=1

|   |             |             |             |
|---|-------------|-------------|-------------|
| C | 0.13295500  | 0.26812200  | -0.13173000 |
| C | 0.03234400  | -1.12392800 | -0.10873500 |
| C | -2.37277600 | -0.89780400 | 0.02928800  |
| O | -3.63299100 | -1.45913100 | 0.11055500  |
| H | -3.55336500 | -2.42049500 | 0.08950700  |
| C | 1.26383500  | -1.99472800 | -0.17356000 |
| H | 1.46470700  | -2.41102800 | 0.81913000  |
| H | 1.07577400  | -2.84291100 | -0.83545300 |
| C | 2.46598300  | -1.19267400 | -0.65828500 |
| H | 2.38247700  | -1.00335600 | -1.73310500 |
| H | 3.39505600  | -1.74021700 | -0.48563600 |
| C | 2.54210500  | 0.15820200  | 0.05098400  |
| C | 3.68424400  | 0.99522100  | -0.49575200 |
| H | 3.67889200  | 1.98874300  | -0.04147800 |
| H | 4.63703800  | 0.51334700  | -0.26655600 |
| H | 3.59640600  | 1.10040200  | -1.57948700 |
| C | 2.65020100  | 0.01640800  | 1.56596000  |
| H | 3.52168000  | -0.59145400 | 1.82079200  |
| H | 2.76612100  | 1.00182400  | 2.02283700  |
| H | 1.76333600  | -0.45823900 | 1.99136000  |
| O | 1.34428400  | 0.91400400  | -0.25990100 |
| C | -1.00800900 | 1.08357600  | -0.06733300 |
| C | -2.27873000 | 0.49786500  | -0.00416700 |
| C | -1.23771700 | -1.69202200 | -0.02059200 |
| C | -0.86715400 | 2.58307100  | -0.08857400 |
| H | 0.12387900  | 2.89026800  | 0.24048100  |
| H | -1.01988900 | 2.97651300  | -1.09915200 |
| H | -1.60775100 | 3.05363600  | 0.55953600  |
| C | -3.51787900 | 1.35393100  | 0.03047800  |
| H | -3.63483500 | 1.83892800  | 1.00466000  |
| H | -3.46473000 | 2.14481000  | -0.72060600 |
| H | -4.41174300 | 0.76263100  | -0.15875200 |
| H | -1.33981800 | -2.77382100 | -0.00119300 |

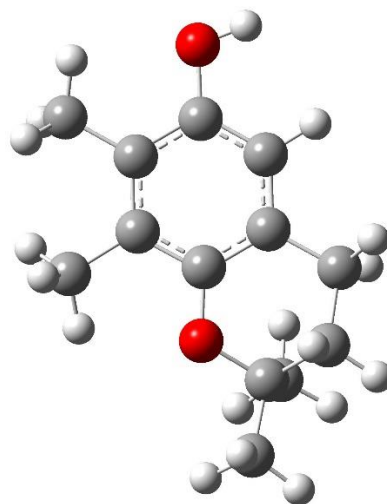

# $\gamma$ -tocopherol anion

Charge=-1, Multiplicity=1

|   |             |             |             |
|---|-------------|-------------|-------------|
| C | 0.10023400  | 0.25576900  | -0.15111800 |
| C | 0.01489400  | -1.13528200 | -0.12869000 |
| C | -2.44202400 | -0.98457100 | 0.04189400  |
| O | -3.61323700 | -1.57460600 | 0.15113500  |
| C | 1.26277400  | -1.98729900 | -0.18746800 |
| H | 1.45965800  | -2.40895900 | 0.80426000  |
| H | 1.09708100  | -2.83504100 | -0.85664200 |
| C | 2.46384400  | -1.17007700 | -0.65095300 |
| H | 2.39776100  | -0.98172000 | -1.72747500 |
| H | 3.39749200  | -1.70541600 | -0.46254800 |
| C | 2.50818400  | 0.18437000  | 0.05634200  |
| C | 3.65774800  | 1.02933000  | -0.46432900 |
| H | 3.63334100  | 2.02412800  | -0.01299400 |
| H | 4.60958500  | 0.55694200  | -0.21203900 |
| H | 3.59529500  | 1.13242800  | -1.55018400 |
| C | 2.58869500  | 0.04374900  | 1.57416300  |
| H | 3.46245300  | -0.55283900 | 1.84775100  |
| H | 2.68325800  | 1.03074000  | 2.03314300  |
| H | 1.69925200  | -0.44159400 | 1.98134800  |
| O | 1.31455300  | 0.92299500  | -0.28699300 |
| C | -1.05848600 | 1.04702900  | -0.08044500 |
| C | -2.31668900 | 0.43774700  | -0.01349900 |
| C | -1.24481900 | -1.72713700 | -0.02718400 |
| C | -0.93992800 | 2.55276300  | -0.08381600 |
| H | 0.06714400  | 2.87105200  | 0.17967500  |
| H | -1.17292800 | 2.96861200  | -1.06983000 |
| H | -1.63662100 | 2.99977100  | 0.62771500  |
| C | -3.57234600 | 1.27178100  | 0.01793200  |
| H | -3.85404500 | 1.54830600  | 1.04115500  |
| H | -3.46045100 | 2.19697800  | -0.54939800 |
| H | -4.40869900 | 0.71280500  | -0.40306500 |
| H | -1.31259500 | -2.81233400 | -0.00098600 |

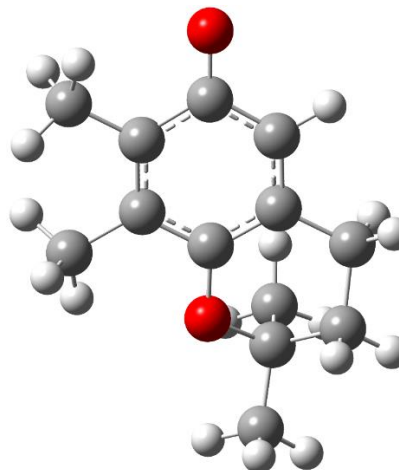

# $\alpha$ -tocopherol

Charge=0, Multiplicity=1

|   |             |             |             |
|---|-------------|-------------|-------------|
| C | -0.27300900 | -0.47007000 | -0.15644700 |
| C | -0.04239700 | 0.90784100  | -0.13718600 |
| C | 2.31548300  | 0.46360100  | 0.02913200  |
| O | 3.60144200  | 0.96872900  | 0.11050300  |
| H | 4.23775000  | 0.24685400  | 0.17148300  |
| C | -1.19240600 | 1.88346000  | -0.22861900 |
| H | -1.33399500 | 2.36887500  | 0.74393100  |
| H | -0.94119400 | 2.68105100  | -0.93217700 |
| C | -2.47791900 | 1.19127100  | -0.66489300 |
| H | -2.44424000 | 0.97844100  | -1.73796700 |
| H | -3.34405500 | 1.82982100  | -0.47783200 |
| C | -2.65916700 | -0.13461000 | 0.06720200  |
| C | -3.88863700 | -0.87172300 | -0.43224600 |
| H | -3.96165500 | -1.85387400 | 0.04065300  |
| H | -4.78636900 | -0.30057400 | -0.18645600 |
| H | -3.84242900 | -1.00267600 | -1.51574700 |
| C | -2.70933000 | 0.03660900  | 1.58241500  |
| H | -3.52456000 | 0.71244500  | 1.85165500  |
| H | -2.88578500 | -0.93033900 | 2.05909000  |
| H | -1.77710100 | 0.44911600  | 1.97410400  |
| O | -1.54501300 | -0.99533000 | -0.27177500 |
| C | 0.77996200  | -1.39546600 | -0.09047200 |
| C | 2.09283000  | -0.91807500 | -0.00444400 |
| C | 1.27234900  | 1.38393700  | -0.02371100 |
| C | 1.54237900  | 2.86516000  | 0.02142900  |
| H | 1.41008800  | 3.31894000  | -0.96600000 |
| H | 0.85034500  | 3.36597700  | 0.70185800  |
| H | 2.55778500  | 3.07342900  | 0.35256100  |
| C | 0.49854200  | -2.87776900 | -0.11902100 |
| H | -0.56996800 | -3.07580100 | -0.14035500 |
| H | 0.94748600  | -3.34505000 | -0.99962700 |
| H | 0.91845300  | -3.37243000 | 0.76012800  |
| C | 3.28092100  | -1.84456200 | 0.05406400  |
| H | 3.85830600  | -1.68804200 | 0.97150600  |
| H | 2.98647400  | -2.89053800 | 0.02701000  |
| H | 3.95561500  | -1.67044400 | -0.79086600 |

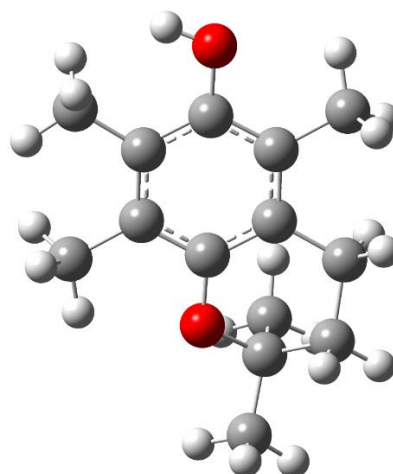

**$\alpha$ -tocopherol anion**

Charge=-1, Multiplicity=1

|   |             |             |             |
|---|-------------|-------------|-------------|
| C | -0.24331300 | -0.46118700 | -0.16562100 |
| C | -0.00820100 | 0.91741200  | -0.14570700 |
| C | 2.40433200  | 0.48749200  | 0.02803800  |
| O | 3.64370000  | 0.92622200  | 0.10328000  |
| C | -1.16983400 | 1.88692000  | -0.24312200 |
| H | -1.31234900 | 2.38370700  | 0.72348300  |
| H | -0.93245300 | 2.67740500  | -0.95874900 |
| C | -2.45960100 | 1.19199200  | -0.66441800 |
| H | -2.43835900 | 0.97902600  | -1.73812500 |
| H | -3.32423400 | 1.83093700  | -0.46909200 |
| C | -2.63060300 | -0.13647900 | 0.06560700  |
| C | -3.87231700 | -0.86669600 | -0.41599500 |
| H | -3.94239800 | -1.85041900 | 0.05449000  |
| H | -4.76461800 | -0.29334700 | -0.15542200 |
| H | -3.84365200 | -0.99507500 | -1.50056400 |
| C | -2.66182000 | 0.03261300  | 1.58254400  |
| H | -3.47561000 | 0.70503600  | 1.86498700  |
| H | -2.82880200 | -0.93578000 | 2.06025200  |
| H | -1.72563900 | 0.44735500  | 1.96184000  |
| O | -1.52664300 | -0.99069700 | -0.29910300 |
| C | 0.81129400  | -1.38262400 | -0.08648200 |
| C | 2.12587500  | -0.90818800 | -0.00547500 |
| C | 1.30773400  | 1.38777200  | -0.02013400 |
| C | 1.61227500  | 2.86271900  | 0.05411600  |
| H | 2.04412300  | 3.23306700  | -0.88312500 |
| H | 0.72894900  | 3.46129200  | 0.27274700  |
| H | 2.35333200  | 3.05843400  | 0.83324700  |
| C | 0.52228500  | -2.86692900 | -0.09939600 |
| H | -0.54654200 | -3.06272800 | -0.05523100 |
| H | 0.91270500  | -3.33993600 | -1.00539400 |
| H | 0.99278700  | -3.36586100 | 0.75113200  |
| C | 3.30715800  | -1.84284400 | 0.05110000  |
| H | 3.84936900  | -1.73621900 | 0.99687500  |
| H | 3.02095200  | -2.88770000 | -0.05668600 |
| H | 4.02439600  | -1.60523000 | -0.74041500 |

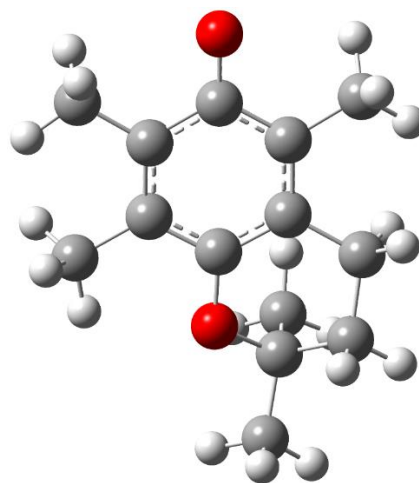

### N,N-dimethyl-4-aminophenol

Charge=0, Multiplicity=1

|   |             |             |             |
|---|-------------|-------------|-------------|
| C | 2.18372300  | -0.00499200 | 0.03390900  |
| C | 1.51592500  | 1.19887600  | -0.17936900 |
| C | 0.13470400  | 1.21725400  | -0.28541400 |
| C | -0.62680800 | 0.04037200  | -0.17503500 |
| C | 0.06451800  | -1.15666000 | 0.04348600  |
| C | 1.45677000  | -1.17984600 | 0.14021900  |
| H | 2.08649800  | 2.11607900  | -0.27057600 |
| H | -0.35584100 | 2.16357900  | -0.47654200 |
| H | -0.46472000 | -2.09451800 | 0.14088300  |
| H | 1.97396200  | -2.11947600 | 0.30639900  |
| N | -2.03676000 | 0.09621200  | -0.32790400 |
| O | 3.55848100  | 0.02866100  | 0.12846300  |
| H | 3.89125600  | -0.86572700 | 0.27290600  |
| C | -2.67825300 | 1.11459300  | 0.50986600  |
| H | -3.74336800 | 1.13941200  | 0.27966100  |
| H | -2.55578600 | 0.88846000  | 1.57865200  |
| H | -2.27247200 | 2.10401700  | 0.31294400  |
| C | -2.72188800 | -1.18025400 | -0.16736400 |
| H | -3.78509800 | -1.02610800 | -0.34924000 |
| H | -2.35610500 | -1.90728900 | -0.89247500 |
| H | -2.60099200 | -1.59725200 | 0.84322200  |

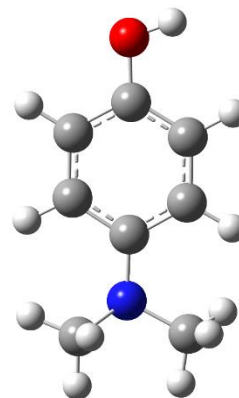

### N,N-dimethyl-4-aminophenol anion

Charge=-1, Multiplicity=1

|   |             |             |             |
|---|-------------|-------------|-------------|
| C | 2.29270800  | 0.04181900  | 0.05155400  |
| C | 1.59249400  | -1.16191500 | -0.23503000 |
| C | 0.21214000  | -1.20195200 | -0.35740500 |
| C | -0.57883300 | -0.05471200 | -0.19190900 |
| C | 0.08869200  | 1.14087400  | 0.08730500  |
| C | 1.47959800  | 1.18924300  | 0.19630700  |
| H | 2.16944100  | -2.07219000 | -0.37020100 |
| H | -0.26773600 | -2.14588900 | -0.59740800 |
| H | -0.46562400 | 2.06239500  | 0.21883300  |
| H | 1.96311800  | 2.13894000  | 0.40614700  |
| N | -2.00305400 | -0.15703200 | -0.33955500 |
| O | 3.59899300  | 0.08007500  | 0.16760400  |
| C | -2.70088100 | 1.12041100  | -0.28283500 |
| H | -3.76027000 | 0.94829300  | -0.47645800 |
| H | -2.61014900 | 1.60945000  | 0.69912300  |
| H | -2.31873300 | 1.79951900  | -1.04576500 |
| C | -2.59031000 | -1.06812100 | 0.64784600  |
| H | -3.65730600 | -1.17756600 | 0.44691400  |
| H | -2.13174200 | -2.05349900 | 0.58789900  |
| H | -2.46521500 | -0.68471600 | 1.67197400  |

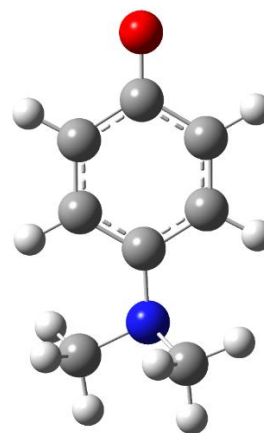



**6-hydroxy-5,7,8-trimethyl-1,2,3,4-tetrahydroquinoline**

Charge=0, Multiplicity=1

|   |             |             |             |
|---|-------------|-------------|-------------|
| C | -1.74877100 | -0.67365100 | 0.04457800  |
| C | -0.54926800 | -1.39014200 | -0.02820700 |
| C | 0.67792100  | -0.69282200 | -0.08919800 |
| C | 0.70407000  | 0.70821000  | -0.07013900 |
| C | -0.50136000 | 1.42775700  | -0.08293400 |
| C | -1.70079500 | 0.72665300  | -0.02417400 |
| C | -0.49822800 | 2.93469500  | -0.12424200 |
| H | -0.33727700 | 3.35921000  | 0.87233600  |
| H | 0.29950600  | 3.30663000  | -0.76919200 |
| H | -1.44552300 | 3.31949300  | -0.49838800 |
| C | -0.50140500 | -2.89676800 | -0.04107000 |
| H | 0.17643300  | -3.24421500 | -0.82415600 |
| H | -0.11958300 | -3.29384500 | 0.90653700  |
| H | -1.47419600 | -3.34577200 | -0.22328800 |
| C | -3.10088400 | -1.33024700 | 0.18997700  |
| H | -3.67547900 | -1.28232300 | -0.74157100 |
| H | -3.02570800 | -2.37475200 | 0.47970300  |
| H | -3.69030800 | -0.83112400 | 0.96492100  |
| O | -2.86838700 | 1.47539300  | -0.00141700 |
| H | -3.63057300 | 0.89740100  | -0.11815300 |
| C | 2.02145000  | 1.45112500  | 0.02105900  |
| H | 2.30822900  | 1.84054200  | -0.96336500 |
| H | 1.89991100  | 2.31874700  | 0.67375900  |
| C | 3.12755800  | 0.54469800  | 0.54940500  |
| H | 2.94378700  | 0.30187600  | 1.60117600  |
| H | 4.09641600  | 1.04403500  | 0.48293400  |
| C | 3.13869600  | -0.73409400 | -0.27209400 |
| H | 3.92032000  | -1.41871400 | 0.05700500  |
| H | 3.34810100  | -0.47724400 | -1.31660300 |
| N | 1.86453700  | -1.44938800 | -0.20685400 |
| H | 1.88738400  | -2.22986100 | 0.43789400  |

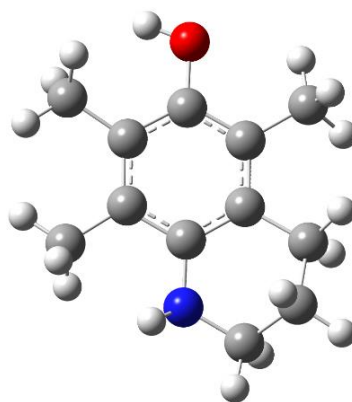

**6-hydroxy-5,7,8-trimethyl-1,2,3,4-tetrahydroquinoline anion**

Charge=-1, Multiplicity=1

|   |             |             |             |
|---|-------------|-------------|-------------|
| C | -1.80123300 | -0.58340600 | 0.03910300  |
| C | -0.62960300 | -1.34406700 | -0.03284000 |
| C | 0.62785200  | -0.71053400 | -0.07165100 |
| C | 0.69924800  | 0.69077100  | -0.04903900 |
| C | -0.47838900 | 1.45554600  | -0.07402100 |
| C | -1.75654300 | 0.84028900  | -0.01854300 |
| C | -0.42319500 | 2.96245100  | -0.13302700 |
| H | -0.50990200 | 3.41712300  | 0.86165200  |
| H | 0.50467800  | 3.32304500  | -0.57792800 |
| H | -1.25431200 | 3.34754700  | -0.72663700 |
| C | -0.69873500 | -2.85355200 | -0.04462300 |

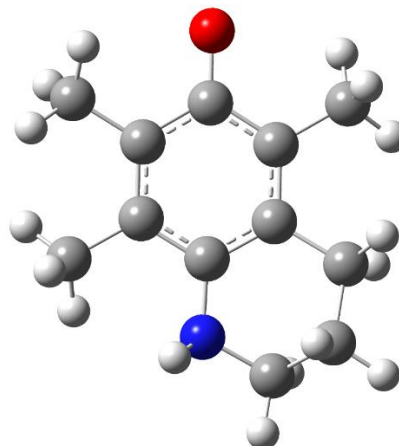

|   |             |             |             |
|---|-------------|-------------|-------------|
| H | 0.15645600  | -3.27675200 | -0.57130700 |
| H | -0.69146300 | -3.26735800 | 0.97069400  |
| H | -1.60651800 | -3.20827800 | -0.53343400 |
| C | -3.14869200 | -1.25109900 | 0.16823100  |
| H | -3.58486800 | -1.49451500 | -0.80828000 |
| H | -3.08925600 | -2.17957600 | 0.73793800  |
| H | -3.85182500 | -0.58923300 | 0.67420300  |
| O | -2.86133900 | 1.56106200  | -0.00687700 |
| C | 2.04510800  | 1.38985100  | 0.05322200  |
| H | 2.32285500  | 1.81958800  | -0.91726100 |
| H | 1.96158200  | 2.23013100  | 0.74694300  |
| C | 3.14541500  | 0.44006300  | 0.51228500  |
| H | 3.00751800  | 0.18144100  | 1.56796900  |
| H | 4.12599200  | 0.91101900  | 0.40879300  |
| C | 3.06829500  | -0.82630700 | -0.32547000 |
| H | 3.87230300  | -1.52227100 | -0.08233600 |
| H | 3.17898900  | -0.55577100 | -1.38226800 |
| N | 1.80030000  | -1.53210700 | -0.15647900 |
| H | 1.84921600  | -2.15993100 | 0.63987800  |

### 9-hydroxyjulolidine

Charge=0, Multiplicity=1

|   |             |             |             |
|---|-------------|-------------|-------------|
| C | -0.20475700 | 2.55223000  | 0.02377800  |
| H | -0.11457000 | 2.95305700  | 1.03934100  |
| H | 0.32276700  | 3.24788900  | -0.63314700 |
| C | -1.67964800 | 2.45985400  | -0.34980500 |
| H | -1.79414100 | 2.36002000  | -1.43291200 |
| H | -2.20682500 | 3.36521800  | -0.04309100 |
| C | -2.29680300 | 1.24758000  | 0.32466800  |
| H | -3.36285400 | 1.17989100  | 0.10100000  |
| H | -2.18911600 | 1.33374000  | 1.41867500  |
| C | -2.33658100 | -1.18101700 | 0.32333500  |
| H | -2.23338500 | -1.27116200 | 1.41745500  |
| H | -3.39963400 | -1.07885700 | 0.09816500  |
| C | -1.75775400 | -2.41218600 | -0.35073300 |
| H | -1.86687800 | -2.30830900 | -1.43402400 |
| H | -2.31420800 | -3.30032400 | -0.04538800 |
| C | -0.28748100 | -2.55188200 | 0.02591700  |
| H | 0.21845500  | -3.26644600 | -0.62762000 |
| H | -0.21294300 | -2.95226200 | 1.04293600  |
| N | -1.66476200 | 0.02289700  | -0.15813700 |
| O | 3.93173500  | -0.12174900 | 0.04176000  |
| H | 4.30077900  | 0.76971500  | 0.04232500  |
| C | 1.87553100  | 1.16474700  | 0.01201200  |
| H | 2.43673000  | 2.09519200  | 0.03008000  |
| C | 1.83602400  | -1.23343600 | 0.01147400  |
| H | 2.36926500  | -2.17878300 | 0.02950400  |
| C | 0.44370900  | -1.22619400 | -0.01562200 |
| C | -0.25241400 | 0.00058700  | -0.04772100 |

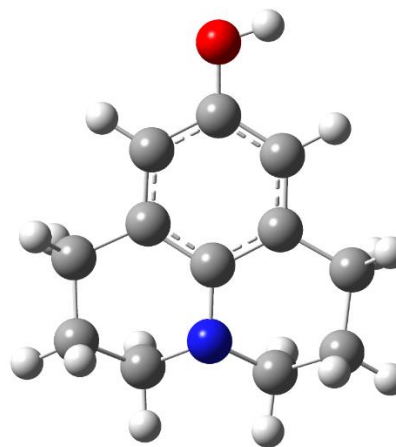

|   |            |             |             |
|---|------------|-------------|-------------|
| C | 0.48185900 | 1.20300300  | -0.01580900 |
| C | 2.55265000 | -0.04576400 | 0.02010300  |

### 9-hydroxyjulolidine anion

Charge=-1, Multiplicity=1

|   |             |             |             |
|---|-------------|-------------|-------------|
| C | 0.20477000  | 2.54907100  | 0.01649800  |
| H | -0.30137800 | 3.25324900  | -0.64873500 |
| H | 0.10724600  | 2.95577500  | 1.02936800  |
| C | 1.68471900  | 2.43830100  | -0.33503500 |
| H | 2.22121300  | 3.33264700  | -0.01114200 |
| H | 1.81545100  | 2.34882700  | -1.41752600 |
| C | 2.27414900  | 1.20832400  | 0.33297500  |
| H | 2.13716500  | 1.27850700  | 1.42626100  |
| H | 3.34614300  | 1.13642000  | 0.13799900  |
| C | 2.27413800  | -1.20832700 | 0.33299600  |
| H | 3.34613600  | -1.13642900 | 0.13803800  |
| H | 2.13713200  | -1.27850000 | 1.42627900  |
| C | 1.68471700  | -2.43830500 | -0.33502200 |
| H | 2.22120500  | -3.33265200 | -0.01111900 |
| H | 1.81547000  | -2.34882900 | -1.41750900 |
| C | 0.20476200  | -2.54907400 | 0.01648300  |
| H | 0.10721700  | -2.95579300 | 1.02934400  |
| H | -0.30137800 | -3.25323700 | -0.64877200 |
| N | 1.64324000  | -0.00000300 | -0.18806700 |
| O | -3.97321500 | 0.00000300  | 0.06091000  |
| C | -1.89796100 | 1.19315000  | 0.00948000  |
| H | -2.42954600 | 2.14197100  | 0.03500200  |
| C | -1.89796200 | -1.19314500 | 0.00947600  |
| H | -2.42955000 | -2.14196600 | 0.03499400  |
| C | -0.50475700 | -1.20894400 | -0.02766300 |
| C | 0.21658800  | 0.00000000  | -0.06259900 |
| C | -0.50475500 | 1.20894600  | -0.02765600 |
| C | -2.65665600 | 0.00000300  | 0.02451700  |

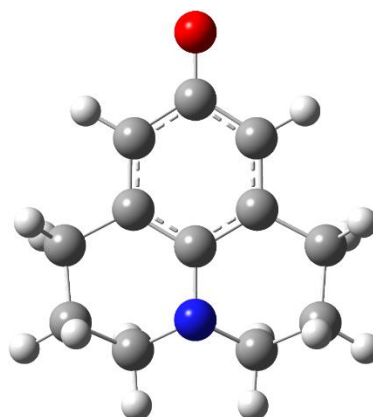

### 4-butadienylphenol

Charge=0, Multiplicity=1

|   |             |             |             |
|---|-------------|-------------|-------------|
| C | 2.32462300  | 1.13917100  | -0.00006900 |
| C | 2.77711400  | -0.17666400 | -0.00002700 |
| C | 1.86394500  | -1.23164000 | 0.00005700  |
| C | 0.50329600  | -0.96623900 | 0.00009900  |
| C | 0.02054200  | 0.35033800  | 0.00004900  |
| C | 0.95943600  | 1.39062100  | -0.00003000 |
| H | 3.04320900  | 1.95033100  | -0.00012700 |
| H | 2.22820400  | -2.25359300 | 0.00010000  |
| H | -0.18799700 | -1.80103100 | 0.00017900  |
| H | 0.60931200  | 2.41754900  | -0.00005800 |
| O | 4.13149200  | -0.38595900 | -0.00007000 |
| H | 4.31982800  | -1.33326700 | 0.00009000  |
| C | -1.40828900 | 0.68290100  | 0.00008000  |

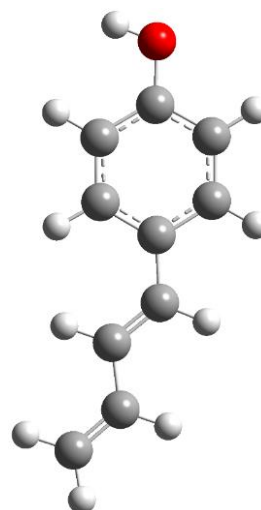

|   |             |             |             |
|---|-------------|-------------|-------------|
| H | -1.63464000 | 1.74784100  | 0.00020200  |
| C | -2.43774700 | -0.17924100 | -0.00004800 |
| H | -2.26786100 | -1.25358800 | -0.00020200 |
| C | -3.82632700 | 0.25913000  | 0.00000300  |
| H | -3.99507000 | 1.33409000  | 0.00010700  |
| C | -4.86901500 | -0.57771300 | -0.00004900 |
| H | -4.72376300 | -1.65399400 | -0.00014300 |
| H | -5.88862500 | -0.21065000 | 0.00001600  |

#### 4-butadienylphenol anion

Charge=-1, Multiplicity=1

|   |             |             |             |
|---|-------------|-------------|-------------|
| C | -2.38401900 | 1.11485100  | -0.00002400 |
| C | -2.89902100 | -0.21236800 | -0.00001700 |
| C | -1.92171200 | -1.25417800 | 0.00004800  |
| C | -0.56628500 | -0.98818500 | 0.00007800  |
| C | -0.07198700 | 0.33034900  | 0.00005300  |
| C | -1.02234800 | 1.36534000  | 0.00001100  |
| H | -3.09093900 | 1.93881600  | -0.00006000 |
| H | -2.27467800 | -2.28100700 | 0.00007100  |
| H | 0.12888400  | -1.82226200 | 0.00012700  |
| H | -0.67157700 | 2.39410500  | 0.00000000  |
| O | -4.17049600 | -0.46407800 | -0.00006300 |
| C | 1.34869600  | 0.66094400  | 0.00005600  |
| H | 1.57156000  | 1.72794000  | 0.00011700  |
| C | 2.39477700  | -0.18801000 | -0.00002000 |
| H | 2.23948000  | -1.26480800 | -0.00009500 |
| C | 3.77363500  | 0.27373100  | -0.00001200 |
| H | 3.91853700  | 1.35288700  | 0.00005900  |
| C | 4.84206000  | -0.53308800 | -0.00008700 |
| H | 4.72956600  | -1.61340500 | -0.00015800 |
| H | 5.85036400  | -0.13595500 | -0.00007900 |

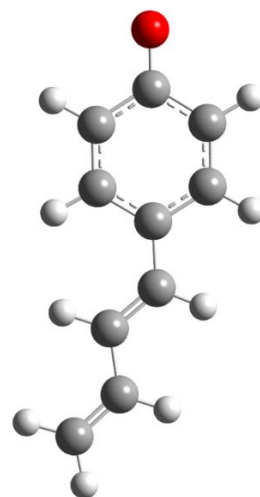

#### 4-vinylphenylphenol

Charge=0, Multiplicity=1

|   |             |             |             |
|---|-------------|-------------|-------------|
| C | -2.32520100 | 1.32999100  | -0.00003000 |
| C | -1.45564800 | 0.23286600  | -0.00019300 |
| C | -2.02365800 | -1.05133200 | -0.00027900 |
| C | -3.39723400 | -1.22823200 | -0.00013200 |
| C | -4.24110700 | -0.11656000 | 0.00010100  |
| C | -3.70547000 | 1.16687100  | 0.00009800  |
| H | -1.91111900 | 2.33292200  | 0.00002000  |
| H | -1.38925400 | -1.93006300 | -0.00040800 |
| H | -3.83070700 | -2.22155400 | -0.00014100 |
| H | -4.36644100 | 2.02708600  | 0.00024300  |
| C | -0.00821900 | 0.48083600  | -0.00017300 |
| H | 0.26375700  | 1.53329100  | 0.00004600  |
| C | 0.95724500  | -0.44955100 | -0.00032500 |
| H | 0.68768100  | -1.50255100 | -0.00051800 |
| C | 2.40543400  | -0.19377500 | -0.00016200 |

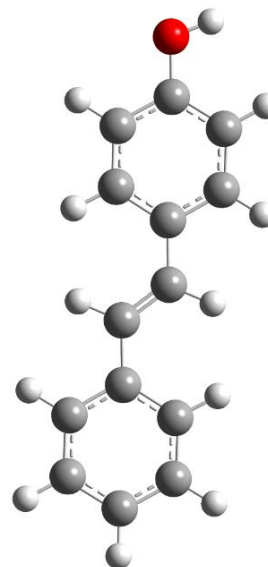

|   |             |             |             |
|---|-------------|-------------|-------------|
| C | 2.96341900  | 1.09430900  | -0.00020600 |
| C | 3.27640500  | -1.29174100 | 0.00007900  |
| C | 4.34076800  | 1.26964000  | 0.00002400  |
| H | 2.32207700  | 1.96800000  | -0.00042300 |
| C | 4.65664000  | -1.11576200 | 0.00030800  |
| H | 2.85981900  | -2.29380100 | 0.00010000  |
| C | 5.19559000  | 0.16690300  | 0.00028700  |
| H | 4.75180600  | 2.27274100  | -0.00001000 |
| H | 5.30944300  | -1.98110500 | 0.00050100  |
| H | 6.26980100  | 0.30964000  | 0.00046700  |
| O | -5.59167700 | -0.34688500 | 0.00034600  |
| H | -6.06724300 | 0.49369100  | 0.00097400  |

#### 4-vinylphenylphenol anion

Charge=-1, Multiplicity=1

|   |             |             |             |
|---|-------------|-------------|-------------|
| C | -2.38272400 | 1.32675100  | 0.00000200  |
| C | -1.50755500 | 0.22727100  | 0.00000000  |
| C | -2.09467100 | -1.05263300 | -0.00000300 |
| C | -3.46577800 | -1.22142800 | -0.00000400 |
| C | -4.36666400 | -0.11325300 | -0.00000400 |
| C | -3.75907200 | 1.17371300  | 0.00000100  |
| H | -1.96010200 | 2.32823300  | 0.00000500  |
| H | -1.46276700 | -1.93546000 | -0.00000400 |
| H | -3.89020300 | -2.22087600 | -0.00000600 |
| H | -4.40577800 | 2.04571600  | 0.00000400  |
| O | -5.65335700 | -0.27395400 | -0.00000100 |
| C | -0.06596600 | 0.46211600  | 0.00000100  |
| H | 0.21187600  | 1.51430900  | 0.00000400  |
| C | 0.90789800  | -0.46555700 | -0.00000100 |
| H | 0.64269300  | -1.51995900 | -0.00000400 |
| C | 2.35289400  | -0.20102400 | 0.00000000  |
| C | 2.90684400  | 1.09026900  | -0.00000300 |
| C | 3.23492200  | -1.29205500 | 0.00000400  |
| C | 4.28329100  | 1.27431100  | -0.00000100 |
| H | 2.26123800  | 1.96093500  | -0.00000700 |
| C | 4.61387100  | -1.10727900 | 0.00000600  |
| H | 2.82620200  | -2.29749700 | 0.00000600  |
| C | 5.14691700  | 0.17832200  | 0.00000300  |
| H | 4.68691800  | 2.28063700  | -0.00000400 |
| H | 5.27133400  | -1.96934300 | 0.00000900  |
| H | 6.22019200  | 0.32779600  | 0.00000400  |

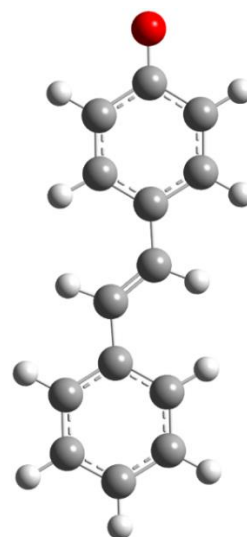

Cartesian coordinates of the optimized acids and conjugate bases of the cannabinoids studied at the M06-2X(SMD)/6-311++G(d,p) level of theory in water at 298.15 K.

**$\Delta^8$ -tetrahydrocannabinol**

Charge=0, Multiplicity=1

|   |             |             |             |
|---|-------------|-------------|-------------|
| C | 1.24291800  | 1.20934500  | 0.29977700  |
| C | -0.12903800 | 0.99293900  | 0.15903100  |
| C | -0.74256300 | -0.19626000 | 0.56938900  |
| C | 0.08075500  | -1.11929200 | 1.23132600  |
| C | 1.44875100  | -0.91991800 | 1.38238700  |
| C | 2.04493900  | 0.24596800  | 0.89960300  |
| H | 1.66303800  | 2.14658000  | -0.04910200 |
| H | 2.04197600  | -1.67364200 | 1.89236300  |
| O | -0.52184400 | -2.23470400 | 1.75535100  |
| H | 0.14263700  | -2.77760600 | 2.19775400  |
| O | -0.84000400 | 2.02142200  | -0.40126400 |
| C | -2.22010600 | -0.43701300 | 0.33879400  |
| H | -2.73208900 | -0.44917900 | 1.31137600  |
| C | -2.82471200 | 0.68610300  | -0.51473900 |
| H | -2.49465500 | 0.51912700  | -1.54969800 |
| C | -2.26827500 | 2.05786000  | -0.12803100 |
| C | -2.52775800 | -1.76675700 | -0.36695300 |
| C | -3.98410400 | -1.88106600 | -0.75530900 |
| C | -4.79793800 | -0.82252000 | -0.77349900 |
| C | -4.34787900 | 0.58758700  | -0.49329500 |
| H | -4.77748100 | 1.25340500  | -1.24735900 |
| H | -4.74158500 | 0.92318500  | 0.47438700  |
| C | -2.47564700 | 2.42121700  | 1.33929000  |
| H | -2.02596500 | 3.39684800  | 1.53789000  |
| H | -3.54156600 | 2.48411100  | 1.56547900  |
| H | -2.02421600 | 1.68854300  | 2.01112200  |
| C | -2.79751800 | 3.15850700  | -1.03106800 |
| H | -2.69114400 | 2.87969200  | -2.08232700 |
| H | -3.85155700 | 3.34691800  | -0.82157300 |
| H | -2.24214900 | 4.08160900  | -0.85067500 |
| C | -4.45148500 | -3.26630100 | -1.10216500 |
| H | -4.33640600 | -3.93839100 | -0.24594100 |
| H | -5.49739200 | -3.27236200 | -1.41358400 |
| H | -3.84442600 | -3.68171200 | -1.91336900 |
| C | 3.53613300  | 0.43845500  | 0.99972400  |
| H | 3.90635500  | -0.02814700 | 1.91760200  |
| H | 3.76428600  | 1.50678600  | 1.05734800  |
| C | 4.27125200  | -0.16778600 | -0.20215600 |

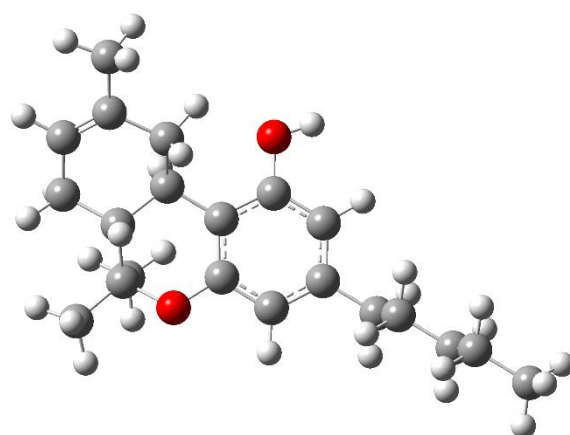

|   |             |             |             |
|---|-------------|-------------|-------------|
| H | 4.03877800  | -1.23722400 | -0.26223700 |
| H | 3.89165300  | 0.29124100  | -1.12222700 |
| C | 5.78241700  | 0.02421000  | -0.12011100 |
| H | 6.15613600  | -0.42962900 | 0.80578900  |
| H | 6.00878600  | 1.09547500  | -0.05644300 |
| C | 6.52449900  | -0.57714900 | -1.31103100 |
| H | 6.29791200  | -1.64707700 | -1.37198800 |
| H | 6.14717000  | -0.12488000 | -2.23454700 |
| C | 8.03408300  | -0.37553700 | -1.21930200 |
| H | 8.43400000  | -0.84138400 | -0.31428200 |
| H | 8.55073000  | -0.81170400 | -2.07729900 |
| H | 8.28229400  | 0.68894100  | -1.18357800 |
| H | -5.84630900 | -0.96585400 | -1.02561900 |
| H | -1.90113200 | -1.85939900 | -1.26420300 |
| H | -2.27522600 | -2.61358000 | 0.27227900  |

#### $\Delta^8$ -tetrahydrocannabinol anion

Charge=-1, Multiplicity=1

|   |             |             |             |
|---|-------------|-------------|-------------|
| C | 1.25360300  | 1.17057200  | 0.30185900  |
| C | -0.11933800 | 0.94743200  | 0.16107900  |
| C | -0.74171700 | -0.23105600 | 0.57349700  |
| C | 0.04257600  | -1.20463300 | 1.27787600  |
| C | 1.43907500  | -0.96583700 | 1.38998900  |
| C | 2.04076200  | 0.19211500  | 0.90861400  |
| H | 1.67948900  | 2.10621900  | -0.04422400 |
| H | 2.03900900  | -1.71484600 | 1.90079000  |
| O | -0.49937600 | -2.26060700 | 1.81253300  |
| O | -0.82461100 | 1.98737900  | -0.41405000 |
| C | -2.22315800 | -0.44404000 | 0.34476000  |
| H | -2.73721900 | -0.45297100 | 1.31814100  |
| C | -2.82590700 | 0.68198100  | -0.50567900 |
| H | -2.50906100 | 0.50822300  | -1.54416300 |
| C | -2.24578600 | 2.04727000  | -0.13191300 |
| C | -2.55726000 | -1.76998400 | -0.35539500 |
| C | -4.01732400 | -1.87047600 | -0.73225200 |
| C | -4.82013900 | -0.80287500 | -0.74509800 |
| C | -4.35031900 | 0.60249800  | -0.47078200 |
| H | -4.78085900 | 1.27279300  | -1.22081300 |
| H | -4.73087300 | 0.94340200  | 0.50055900  |
| C | -2.44397200 | 2.42267100  | 1.33443500  |
| H | -1.97417100 | 3.39010900  | 1.52792700  |
| H | -3.50780100 | 2.50877100  | 1.56374200  |
| H | -2.00495300 | 1.68316800  | 2.00673300  |

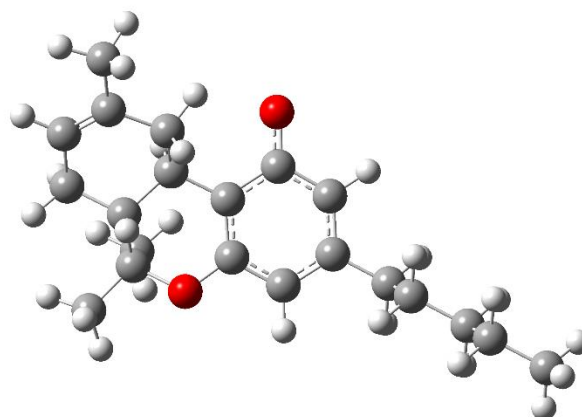

|   |             |             |             |
|---|-------------|-------------|-------------|
| C | -2.76778500 | 3.15108500  | -1.03692000 |
| H | -2.66932200 | 2.86701800  | -2.08774800 |
| H | -3.81888800 | 3.35327600  | -0.82475900 |
| H | -2.20122100 | 4.06906800  | -0.86410100 |
| C | -4.50490600 | -3.25033600 | -1.07402900 |
| H | -4.38931100 | -3.92352400 | -0.21869800 |
| H | -5.55386600 | -3.24509700 | -1.37566300 |
| H | -3.91037100 | -3.67358000 | -1.89054800 |
| C | 3.53533700  | 0.37884900  | 1.01411400  |
| H | 3.90557400  | -0.11696600 | 1.91707400  |
| H | 3.76794300  | 1.44449600  | 1.10797300  |
| C | 4.27962400  | -0.18590100 | -0.20200300 |
| H | 4.04641800  | -1.25233200 | -0.30114800 |
| H | 3.90889200  | 0.30472500  | -1.10946700 |
| C | 5.79091400  | -0.00093300 | -0.10257700 |
| H | 6.15623900  | -0.48758100 | 0.81006200  |
| H | 6.01965200  | 1.06688600  | 0.00062000  |
| C | 6.54306700  | -0.56207900 | -1.30675700 |
| H | 6.31319700  | -1.62822200 | -1.40844800 |
| H | 6.17698900  | -0.07557700 | -2.21735300 |
| C | 8.05248300  | -0.37028600 | -1.19263800 |
| H | 8.44109100  | -0.87004100 | -0.30085000 |
| H | 8.57662500  | -0.77741400 | -2.06033900 |
| H | 8.30449100  | 0.69115700  | -1.11588900 |
| H | -5.87242700 | -0.93460400 | -0.98809500 |
| H | -1.93969800 | -1.87418400 | -1.25830700 |
| H | -2.30265600 | -2.61277100 | 0.28804200  |

### iso-tetrahydrocannabinol

Charge=0, Multiplicity=1

|   |             |             |             |
|---|-------------|-------------|-------------|
| C | 1.25681900  | -1.37293000 | -1.14823300 |
| C | -0.12140100 | -1.38786700 | -0.96824600 |
| C | -0.85704700 | -0.21356100 | -0.76250600 |
| C | -0.13342100 | 0.98396300  | -0.70319700 |
| C | 1.24898600  | 1.01587100  | -0.88177100 |
| C | 1.95122300  | -0.16309300 | -1.11337200 |
| H | 1.77861900  | -2.30962400 | -1.31245000 |
| H | 1.76364200  | 1.96954600  | -0.82982300 |
| O | -0.74627700 | 2.18739700  | -0.47117800 |
| O | -0.73173800 | -2.61990700 | -1.00606200 |
| C | 3.45285300  | -0.13814600 | -1.24509800 |
| H | 3.75805600  | 0.76749200  | -1.77801100 |
| H | 3.78376300  | -0.99638600 | -1.83712800 |

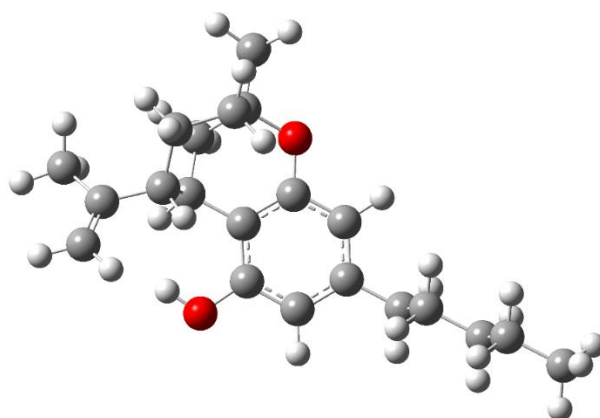



|   |             |             |             |
|---|-------------|-------------|-------------|
| C | 4.14721900  | -0.17056900 | 0.12204300  |
| H | 3.80276700  | 0.68242600  | 0.71785700  |
| H | 3.84080500  | -1.07609900 | 0.65834800  |
| C | 5.66789900  | -0.13184600 | 0.00724800  |
| H | 5.96658500  | 0.77085200  | -0.53948900 |
| H | 6.00937100  | -0.98607800 | -0.58986800 |
| C | 6.36784700  | -0.15299600 | 1.36380500  |
| H | 6.02109200  | 0.69827900  | 1.95957300  |
| H | 6.07070100  | -1.05630900 | 1.90743600  |
| C | 7.88753000  | -0.10577200 | 1.23625400  |
| H | 8.20544600  | 0.80302500  | 0.71755400  |
| H | 8.37391700  | -0.12128800 | 2.21425900  |
| H | 8.25622600  | -0.96190200 | 0.66433800  |
| H | -1.68269800 | -2.54879900 | -0.85110500 |
| C | -2.10928300 | 2.12861500  | 0.02901500  |
| C | -2.36208200 | -0.23352800 | -0.61022100 |
| H | -2.77816700 | -0.91645600 | -1.35830300 |
| C | -2.88398900 | 1.17558400  | -0.87645900 |
| H | -3.95330000 | 1.24520300  | -0.66948900 |
| H | -2.72071000 | 1.46554100  | -1.91773800 |
| C | -2.63192200 | 3.54657400  | -0.06502800 |
| H | -3.64241000 | 3.58658500  | 0.34807600  |
| H | -1.99582500 | 4.22418400  | 0.50938100  |
| H | -2.66329000 | 3.87884300  | -1.10525900 |
| C | -2.08687000 | 1.61159800  | 1.49148600  |
| H | -2.28000600 | 2.44358700  | 2.17210900  |
| H | -1.08321300 | 1.23909900  | 1.71932900  |
| C | -2.78483000 | -0.72066500 | 0.82128600  |
| H | -1.92692700 | -1.24052600 | 1.25957400  |
| C | -3.09858300 | 0.48795200  | 1.72184900  |
| H | -4.10675300 | 0.86349500  | 1.52621700  |
| H | -3.07578600 | 0.17059400  | 2.76672400  |
| C | -3.75174800 | -2.97125600 | 1.17259800  |
| H | -4.55159900 | -3.70240000 | 1.10726400  |
| H | -2.80921900 | -3.29749000 | 1.60225700  |
| H | -5.06111300 | -0.89439400 | -0.88492100 |
| H | -5.65704700 | -0.43502100 | 0.70423200  |
| H | -5.94033500 | -2.07568300 | 0.10022300  |
| C | -3.92079600 | -1.71735300 | 0.74616100  |
| C | -5.21814600 | -1.25894200 | 0.13517700  |

**iso-tetrahydrocannabinol anion**

Charge=-1, Multiplicity=1

|   |             |             |             |
|---|-------------|-------------|-------------|
| C | 1.27610100  | -1.32621600 | -1.17896800 |
| C | -0.12836900 | -1.42299600 | -1.00175200 |
| C | -0.84873500 | -0.20820300 | -0.76819300 |
| C | -0.14719900 | 0.99242200  | -0.68583300 |
| C | 1.23926900  | 1.06333900  | -0.85557400 |
| C | 1.95055900  | -0.10879400 | -1.11210300 |
| H | 1.83116900  | -2.24129400 | -1.36947600 |
| H | 1.73961300  | 2.02295000  | -0.77936400 |
| O | -0.78364000 | 2.19168500  | -0.43085100 |
| O | -0.75107700 | -2.56705200 | -1.05326200 |
| C | 3.45487800  | -0.06285800 | -1.24003300 |
| H | 3.75591200  | 0.87332800  | -1.72126200 |
| H | 3.79486400  | -0.88293800 | -1.88025000 |
| C | 4.15743200  | -0.16879700 | 0.11906300  |
| H | 3.81580000  | 0.64938500  | 0.76356600  |
| H | 3.85496300  | -1.10278300 | 0.60676200  |
| C | 5.67791500  | -0.12345300 | 0.00073100  |
| H | 5.97535600  | 0.80863900  | -0.49525600 |
| H | 6.01632800  | -0.94231900 | -0.64587600 |
| C | 6.38548100  | -0.22296500 | 1.34987400  |
| H | 6.04531900  | 0.59464800  | 1.99463200  |
| H | 6.08761200  | -1.15427000 | 1.84366200  |
| C | 7.90470100  | -0.17456400 | 1.21686200  |
| H | 8.22397300  | 0.76084100  | 0.74872900  |
| H | 8.39657300  | -0.24774200 | 2.18953600  |
| H | 8.26657400  | -0.99834500 | 0.59517300  |
| C | -2.13957100 | 2.09328200  | 0.07103900  |
| C | -2.35229200 | -0.25546700 | -0.62897200 |
| H | -2.73485800 | -0.94193900 | -1.38887800 |
| C | -2.90407500 | 1.14953200  | -0.85534400 |
| H | -3.97400300 | 1.20158300  | -0.64254000 |
| H | -2.75032100 | 1.47363500  | -1.88861700 |
| C | -2.69153700 | 3.50339000  | 0.02211300  |
| H | -3.70030400 | 3.51275200  | 0.44174600  |
| H | -2.06579000 | 4.17789100  | 0.61187700  |
| H | -2.73625300 | 3.86594700  | -1.00771300 |
| C | -2.10156800 | 1.53768900  | 1.51931100  |
| H | -2.30474000 | 2.34775400  | 2.22387000  |
| H | -1.09057200 | 1.17599500  | 1.73053000  |
| C | -2.78681900 | -0.78639000 | 0.77957100  |
| H | -1.93801000 | -1.33413100 | 1.19897800  |

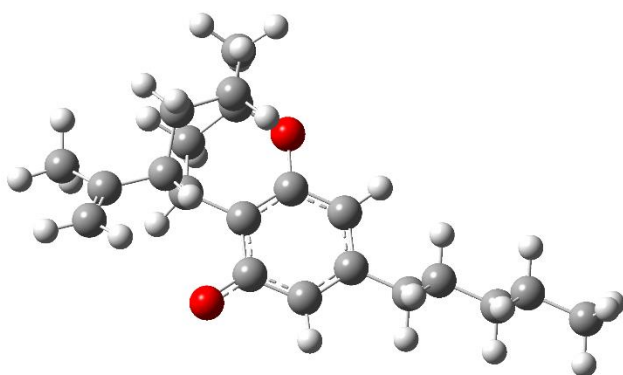

|   |             |             |             |
|---|-------------|-------------|-------------|
| C | -3.09423400 | 0.39277000  | 1.72508200  |
| H | -4.10906000 | 0.76546000  | 1.55719300  |
| H | -3.05508700 | 0.04309700  | 2.75956000  |
| C | -3.84289200 | -2.99266800 | 1.17683800  |
| H | -4.66840300 | -3.69546800 | 1.11686200  |
| H | -2.92610100 | -3.33736500 | 1.64582300  |
| H | -5.00831400 | -0.99108900 | -1.02087000 |
| H | -5.62566500 | -0.40286300 | 0.51641200  |
| H | -5.96481000 | -2.06624200 | 0.01183900  |
| C | -3.94679200 | -1.75394100 | 0.69017100  |
| C | -5.20792500 | -1.28047700 | 0.01549100  |

### $\Delta^9$ -tetrahydrocannabivarin

Charge=0, Multiplicity=1

|   |             |             |             |
|---|-------------|-------------|-------------|
| C | 2.04791500  | 1.06873100  | -0.07340000 |
| C | 0.66154400  | 0.91956900  | 0.00746800  |
| C | 0.06853300  | -0.25526600 | 0.48501500  |
| C | 0.94115600  | -1.22804900 | 0.99500900  |
| C | 2.32307500  | -1.09561800 | 0.92208500  |
| C | 2.88842300  | 0.05436700  | 0.36823600  |
| H | 2.45155200  | 1.99547600  | -0.46669500 |
| H | 2.95414800  | -1.88613600 | 1.31818800  |
| O | 0.37664600  | -2.31799800 | 1.60758200  |
| H | 1.07653100  | -2.90698100 | 1.91677900  |
| O | -0.07463300 | 1.99882000  | -0.40462300 |
| C | -1.43949100 | -0.39990000 | 0.52330900  |
| H | -1.75148200 | -0.30600300 | 1.57419500  |
| C | -2.09926700 | 0.73242700  | -0.27382100 |
| H | -1.88075500 | 0.55529400  | -1.33633300 |
| C | -1.45793900 | 2.08277000  | 0.04439500  |
| C | -1.97395500 | -1.71854900 | -0.00704900 |
| C | -3.18334100 | -1.83158800 | -0.56440800 |
| H | -1.34956600 | -2.60017500 | 0.08106300  |
| C | -4.11734300 | -0.65728800 | -0.73383600 |
| H | -5.10240500 | -0.92497300 | -0.33718600 |
| H | -4.26287900 | -0.50135500 | -1.81055400 |
| C | -3.61079600 | 0.63608700  | -0.08640900 |
| H | -4.12292200 | 1.49019400  | -0.53380600 |
| H | -3.84168000 | 0.63821300  | 0.98405000  |
| C | -1.47545700 | 2.44296300  | 1.52552400  |
| H | -1.04703500 | 3.43764800  | 1.66807300  |
| H | -2.50462700 | 2.45431400  | 1.89210800  |
| H | -0.90422200 | 1.73131300  | 2.12516300  |

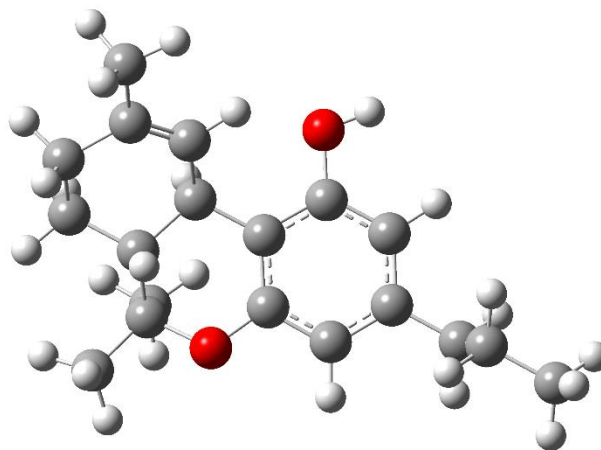

|   |             |             |             |
|---|-------------|-------------|-------------|
| C | -2.05088800 | 3.20693100  | -0.78793300 |
| H | -2.11860600 | 2.91666500  | -1.83931800 |
| H | -3.04766700 | 3.46415500  | -0.42742200 |
| H | -1.41913800 | 4.09402200  | -0.70497100 |
| C | -3.69876800 | -3.14122900 | -1.09126200 |
| H | -4.61257100 | -3.43466600 | -0.56481800 |
| H | -3.95933700 | -3.05103200 | -2.15090100 |
| H | -2.96199900 | -3.93847800 | -0.98009300 |
| C | 4.38388500  | 0.17550100  | 0.22895600  |
| H | 4.87313000  | -0.29583200 | 1.08701600  |
| H | 4.66795100  | 1.23192400  | 0.22753500  |
| C | 4.89458200  | -0.48259000 | -1.05914700 |
| H | 4.60461200  | -1.53815400 | -1.05862900 |
| H | 4.39762500  | -0.01750800 | -1.91656300 |
| C | 6.40758800  | -0.35689600 | -1.20076600 |
| H | 6.91735700  | -0.83420900 | -0.35936600 |
| H | 6.70965000  | 0.69374400  | -1.22277700 |
| H | 6.76150100  | -0.82826800 | -2.12020500 |

#### $\Delta^9$ -tetrahydrocannabivarin anion

Charge=-1, Multiplicity=1

|   |             |             |             |
|---|-------------|-------------|-------------|
| C | 2.04528900  | 0.65327600  | -0.72456700 |
| C | 0.69199900  | 0.66133900  | -0.37318100 |
| C | 0.05104500  | -0.45040400 | 0.17554200  |
| C | 0.84377200  | -1.59193600 | 0.53023400  |
| C | 2.20871400  | -1.58844700 | 0.13465600  |
| C | 2.80221800  | -0.49373000 | -0.48550900 |
| H | 2.48764500  | 1.54198000  | -1.16200900 |
| H | 2.80426000  | -2.46838100 | 0.36466800  |
| O | 0.34107800  | -2.58693800 | 1.20228900  |
| O | 0.03562800  | 1.85418100  | -0.60914400 |
| C | -1.42980900 | -0.39979100 | 0.48806200  |
| H | -1.54305400 | -0.33258400 | 1.58176300  |
| C | -2.07540800 | 0.84547700  | -0.13061200 |
| H | -2.08289200 | 0.70359100  | -1.22091800 |
| C | -1.21140500 | 2.08483500  | 0.09930900  |
| C | -2.21796000 | -1.60887300 | 0.01820300  |
| C | -3.51420500 | -1.54676200 | -0.30212900 |
| H | -1.69603200 | -2.55693300 | -0.05021100 |
| C | -4.30763900 | -0.26221900 | -0.24163100 |
| H | -5.22471000 | -0.43425800 | 0.33221800  |
| H | -4.63672200 | -0.02706400 | -1.26228200 |
| C | -3.52648000 | 0.92422700  | 0.33610800  |

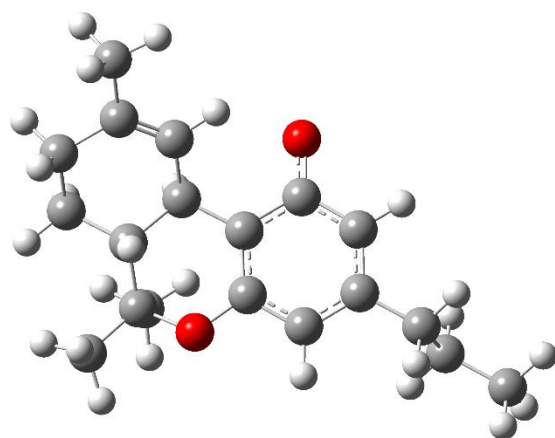

|   |             |             |             |
|---|-------------|-------------|-------------|
| H | -3.99894800 | 1.85687800  | 0.02045200  |
| H | -3.55413100 | 0.89663100  | 1.43061400  |
| C | -0.90933100 | 2.36083600  | 1.56866200  |
| H | -0.33005400 | 3.28280400  | 1.65954700  |
| H | -1.84233400 | 2.48395900  | 2.12406300  |
| H | -0.34074000 | 1.54819300  | 2.02487600  |
| C | -1.79746200 | 3.32046300  | -0.56432700 |
| H | -2.09289100 | 3.10344500  | -1.59403000 |
| H | -2.67072500 | 3.67351100  | -0.01400800 |
| H | -1.05316000 | 4.12003900  | -0.57116100 |
| C | -4.28062500 | -2.74987500 | -0.77660100 |
| H | -5.11425900 | -2.96789000 | -0.10115900 |
| H | -4.71522800 | -2.56365400 | -1.76438500 |
| H | -3.64373600 | -3.63399100 | -0.83780500 |
| C | 4.27623800  | -0.50688200 | -0.81344500 |
| H | 4.46019400  | 0.08653800  | -1.71503300 |
| H | 4.59722500  | -1.53149300 | -1.02662800 |
| C | 5.13302800  | 0.05284300  | 0.32906900  |
| H | 4.81043600  | 1.07598800  | 0.54738100  |
| H | 4.94832200  | -0.53692000 | 1.23278100  |
| C | 6.62012400  | 0.03692600  | -0.00886400 |
| H | 6.82273300  | 0.63877800  | -0.89915600 |
| H | 6.96208200  | -0.98216900 | -0.20979800 |
| H | 7.22045900  | 0.43725400  | 0.81118400  |

### 3-homotetrahydrocannabinol

Charge=0, Multiplicity=1

|   |             |             |             |
|---|-------------|-------------|-------------|
| C | 1.09930488  | 1.47699663  | -1.33143088 |
| C | -0.22650312 | 1.48395263  | -0.91745788 |
| C | -0.90119212 | 0.34083863  | -0.44830688 |
| C | -0.11650412 | -0.82764937 | -0.37017388 |
| C | 1.21764088  | -0.84474437 | -0.77224988 |
| C | 1.83710188  | 0.29909163  | -1.26747688 |
| H | 1.54166088  | 2.39861163  | -1.69337388 |
| H | 1.77491188  | -1.77373237 | -0.69050088 |
| O | -0.67288912 | -1.98178937 | 0.11512512  |
| H | -0.00694112 | -2.68095137 | 0.10127912  |
| O | -0.89300912 | 2.66899263  | -1.04034388 |
| C | -2.35503012 | 0.46521163  | -0.17128488 |
| C | -2.88883912 | 1.70021663  | -0.08510488 |
| C | -1.96179312 | 2.90676463  | -0.09117088 |
| C | -3.22054812 | -0.77506037 | -0.05303588 |
| C | -4.63378612 | -0.50109137 | 0.46151712  |

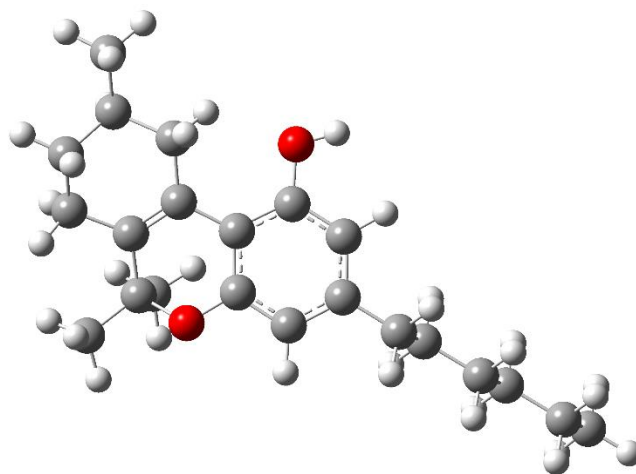

|   |             |             |             |
|---|-------------|-------------|-------------|
| C | -5.20986512 | 0.72384263  | -0.23236488 |
| H | -6.24597312 | 0.89166663  | 0.07523312  |
| H | -5.21501312 | 0.54667663  | -1.31526488 |
| C | -4.36686012 | 1.95451863  | 0.07821312  |
| H | -4.66490012 | 2.77615663  | -0.57689988 |
| H | -4.56281412 | 2.30075163  | 1.10230312  |
| C | -1.36209112 | 3.12229063  | 1.29861512  |
| H | -0.69376812 | 3.98716163  | 1.29134212  |
| H | -2.16672512 | 3.30682463  | 2.01420012  |
| H | -0.80577812 | 2.24155763  | 1.62710912  |
| C | -2.60761412 | 4.19048063  | -0.58716288 |
| H | -3.04939112 | 4.05116063  | -1.57598788 |
| H | -3.38257412 | 4.52349963  | 0.10415112  |
| H | -1.84321612 | 4.96769963  | -0.64723288 |
| C | 3.29521588  | 0.27792363  | -1.64333388 |
| H | 3.48460988  | 1.02876763  | -2.41596488 |
| H | 3.55135288  | -0.69998837 | -2.06186888 |
| C | 4.19920788  | 0.55812663  | -0.43607288 |
| H | 3.94121288  | 1.53668563  | -0.01526988 |
| H | 3.99624088  | -0.18564937 | 0.34289812  |
| C | 5.68122288  | 0.52897863  | -0.79725688 |
| H | 5.87773088  | 1.27106763  | -1.58036588 |
| H | 5.92942788  | -0.45006837 | -1.22445188 |
| C | 6.58882288  | 0.80303463  | 0.39872312  |
| H | 6.34260488  | 1.78355463  | 0.82419312  |
| H | 6.38784788  | 0.06353463  | 1.18351112  |
| C | 8.07356688  | 0.76783863  | 0.04510012  |
| H | 8.27344988  | 1.50631263  | -0.73891288 |
| H | 8.31798788  | -0.21193537 | -0.37949188 |
| C | 8.96725188  | 1.04304363  | 1.25067412  |
| H | 10.02577688 | 1.01390863  | 0.98226012  |
| H | 8.75561388  | 2.02885563  | 1.67426112  |
| H | 8.79980288  | 0.30050863  | 2.03596512  |
| H | -4.56250012 | -0.27418137 | 1.53348312  |
| H | -3.27209312 | -1.27265537 | -1.03140788 |
| H | -2.74461712 | -1.48541737 | 0.61959912  |
| C | -5.51623112 | -1.73050737 | 0.27882112  |
| H | -5.07437912 | -2.61066337 | 0.75427812  |
| H | -6.50712512 | -1.57122337 | 0.71203212  |
| H | -5.64389312 | -1.95155137 | -0.78583088 |

### 3-homotetrahydrocannabinol anion

Charge=-1, Multiplicity=1

|   |             |             |             |
|---|-------------|-------------|-------------|
| C | 0.87267600  | 0.50218400  | -1.06543200 |
| C | -0.45835100 | 0.57125100  | -0.67541000 |
| C | -1.18933200 | -0.51701200 | -0.16914500 |
| C | -0.47805600 | -1.75280400 | 0.04581200  |
| C | 0.88432300  | -1.79777600 | -0.37718700 |
| C | 1.55016200  | -0.71445800 | -0.92715800 |
| H | 1.36271900  | 1.38586900  | -1.45932900 |
| H | 1.40945400  | -2.73934700 | -0.23935200 |
| O | -1.00606000 | -2.79929800 | 0.60052400  |
| O | -1.07852400 | 1.78513400  | -0.86062500 |
| C | -2.64187400 | -0.30724200 | 0.04642000  |
| C | -3.12583700 | 0.95156600  | 0.10013800  |
| C | -2.13477700 | 2.10514200  | 0.07752800  |
| C | -3.57796500 | -1.50010300 | 0.11181800  |
| C | -4.97689000 | -1.16390200 | 0.62562400  |
| C | -5.49306000 | 0.08644500  | -0.07234000 |
| H | -6.52126800 | 0.30439400  | 0.23183000  |
| H | -5.50619100 | -0.09846000 | -1.15410800 |
| C | -4.59410800 | 1.28095500  | 0.22819100  |
| H | -4.84558700 | 2.10249800  | -0.44692300 |
| H | -4.79387500 | 1.65665600  | 1.24169700  |
| C | -1.53094000 | 2.32869600  | 1.46524500  |
| H | -0.80559400 | 3.14642700  | 1.43639500  |
| H | -2.32656700 | 2.59240900  | 2.16624800  |
| H | -1.03740400 | 1.42518300  | 1.82929000  |
| C | -2.70892000 | 3.41009100  | -0.45248000 |
| H | -3.14628300 | 3.27226900  | -1.44372300 |
| H | -3.47508400 | 3.79650100  | 0.22100600  |
| H | -1.90670800 | 4.14790300  | -0.52024800 |
| C | 3.00983400  | -0.81177800 | -1.29720100 |
| H | 3.19858300  | -0.23184100 | -2.20666200 |
| H | 3.26348900  | -1.85376400 | -1.51487100 |
| C | 3.92956900  | -0.29700500 | -0.18300500 |
| H | 3.67781500  | 0.74642100  | 0.03855100  |
| H | 3.73779300  | -0.87000500 | 0.73159200  |
| C | 5.40724200  | -0.39899700 | -0.55012000 |
| H | 5.59155700  | 0.17083300  | -1.46894800 |
| H | 5.65192500  | -1.44387300 | -0.77642100 |
| C | 6.33263000  | 0.10823200  | 0.55248300  |
| H | 6.08899300  | 1.15351300  | 0.77876400  |
| H | 6.14741900  | -0.46065800 | 1.47183600  |

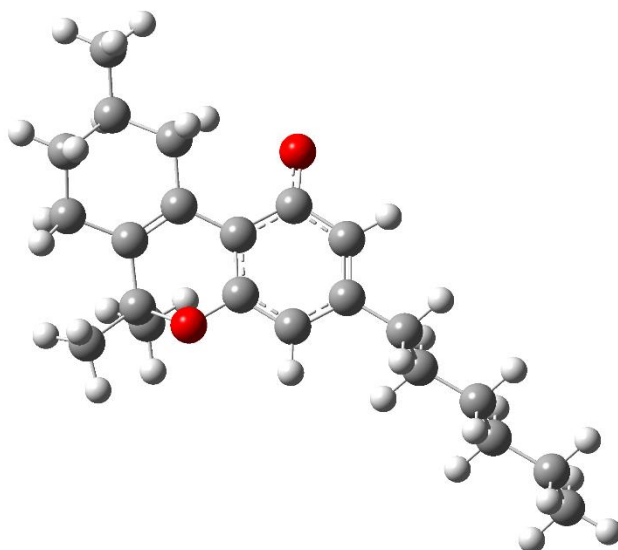

|   |             |             |             |
|---|-------------|-------------|-------------|
| C | 7.81172600  | 0.00535300  | 0.18824100  |
| H | 7.99555900  | 0.57361600  | -0.73008200 |
| H | 8.05374000  | -1.03890300 | -0.03753600 |
| C | 8.72391800  | 0.51578100  | 1.29968400  |
| H | 9.77801200  | 0.43597600  | 1.02411800  |
| H | 8.51401800  | 1.56563600  | 1.52286100  |
| H | 8.57324300  | -0.05645200 | 2.21941000  |
| H | -4.89834100 | -0.94156500 | 1.69841700  |
| H | -3.65504200 | -1.94309100 | -0.89204700 |
| H | -3.13345400 | -2.26840600 | 0.73983900  |
| C | -5.91840600 | -2.34833800 | 0.43883500  |
| H | -5.52451600 | -3.24855300 | 0.91887300  |
| H | -6.90414400 | -2.14009800 | 0.86350600  |
| H | -6.04897700 | -2.56547500 | -0.62643400 |

# nabilone

Charge=0, Multiplicity=1

|   |             |             |             |
|---|-------------|-------------|-------------|
| C | 0.16919800  | -1.51712700 | -0.27727700 |
| C | 1.47665900  | -1.05970600 | -0.14100500 |
| C | 1.77285600  | 0.27444200  | 0.16691200  |
| C | 0.67332100  | 1.09199500  | 0.44740300  |
| C | -0.64241000 | 0.65114500  | 0.31232700  |
| C | -0.91498200 | -0.66270300 | -0.07276000 |
| H | 0.02652200  | -2.56132100 | -0.52997600 |
| H | -1.43473300 | 1.35713800  | 0.52970800  |
| O | 0.93369700  | 2.36403200  | 0.89051200  |
| H | 0.10163300  | 2.81540100  | 1.07946900  |
| O | 2.45806400  | -1.99846000 | -0.32439500 |
| C | 3.20567200  | 0.75634800  | 0.24565800  |
| H | 3.44322500  | 0.97051200  | 1.29684000  |
| C | 4.17004900  | -0.32642800 | -0.26227800 |
| H | 4.06324800  | -0.37663900 | -1.35512100 |
| C | 3.76573700  | -1.71348900 | 0.24476400  |
| C | 3.47069300  | 2.04261400  | -0.56542500 |
| C | 4.91492800  | 2.46228200  | -0.43389000 |
| C | 5.95571200  | 1.39760400  | -0.65721200 |
| H | 6.93128800  | 1.78156500  | -0.35823500 |
| H | 5.97390600  | 1.22047400  | -1.74016300 |
| C | 5.60857100  | 0.08010700  | 0.05095300  |
| H | 6.31150400  | -0.68585400 | -0.27972000 |
| H | 5.73189800  | 0.19945600  | 1.13199100  |
| C | 3.67890500  | -1.81406300 | 1.76414700  |
| H | 3.39334100  | -2.82993100 | 2.04633500  |

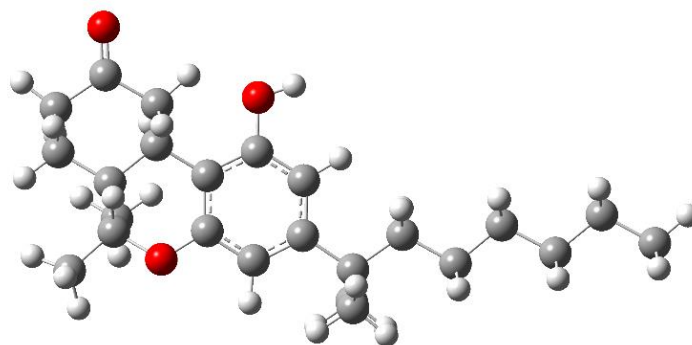



|   |              |             |             |
|---|--------------|-------------|-------------|
| H | 4.65212300   | -1.59488200 | 2.20847800  |
| H | 2.94612200   | -1.12003000 | 2.18062600  |
| C | 4.65953900   | -2.80816600 | -0.31326800 |
| H | 4.78816400   | -2.69095300 | -1.39209900 |
| H | 5.63959400   | -2.78361400 | 0.16456300  |
| H | 4.20756300   | -3.78220100 | -0.11395200 |
| C | -2.34262400  | -1.20622200 | -0.23516700 |
| C | -3.38376000  | -0.09235700 | -0.00758100 |
| H | -3.26468800  | 0.29634100  | 1.01070700  |
| H | -3.16459700  | 0.73786500  | -0.68956900 |
| C | -4.84865500  | -0.48745200 | -0.19801400 |
| H | -5.10806000  | -1.32650400 | 0.45585400  |
| H | -5.02173500  | -0.82159900 | -1.22600200 |
| C | -5.79095000  | 0.67766000  | 0.10147300  |
| H | -5.63280800  | 1.01748400  | 1.13217600  |
| H | -5.53854700  | 1.52466900  | -0.54813500 |
| C | -7.26164400  | 0.31725200  | -0.08989400 |
| H | -7.51548000  | -0.52819700 | 0.56137700  |
| H | -7.42026400  | -0.02531000 | -1.11984200 |
| H | 3.28627400   | 1.83116100  | -1.62604400 |
| H | 2.83994600   | 2.87221800  | -0.25918300 |
| O | 5.21936400   | 3.61551200  | -0.17923800 |
| C | -2.49443000  | -1.77963700 | -1.65399700 |
| H | -2.40258100  | -0.98815000 | -2.40392600 |
| H | -1.73287000  | -2.53459400 | -1.85845300 |
| H | -3.46988900  | -2.25563200 | -1.77346600 |
| C | -2.55092000  | -2.33416200 | 0.79024400  |
| H | -2.47299500  | -1.94805100 | 1.81090500  |
| H | -3.53531800  | -2.79081700 | 0.66812800  |
| H | -1.80437800  | -3.12127900 | 0.66496600  |
| C | -8.20886700  | 1.47797300  | 0.20344900  |
| H | -8.04923200  | 1.82095600  | 1.23151200  |
| H | -7.95670800  | 2.32096700  | -0.44910900 |
| C | -9.67414400  | 1.09889000  | 0.01003100  |
| H | -9.95239800  | 0.27383800  | 0.67181000  |
| H | -10.33920200 | 1.93883000  | 0.22362000  |
| H | -9.85959800  | 0.77720200  | -1.01865800 |

**nabilone anion**

Charge=-1, Multiplicity=1

|   |             |             |             |
|---|-------------|-------------|-------------|
| C | 0.17494500  | -1.51105300 | -0.27437800 |
| C | 1.47811200  | -1.03619300 | -0.14136100 |
| C | 1.77366200  | 0.29250300  | 0.17138000  |
| C | 0.68750100  | 1.15834300  | 0.50669300  |
| C | -0.63629600 | 0.66074500  | 0.33071900  |
| C | -0.90718100 | -0.64629500 | -0.06156600 |
| H | 0.03403300  | -2.55521100 | -0.52716000 |
| H | -1.43505600 | 1.35768800  | 0.55270900  |
| O | 0.88480700  | 2.35788800  | 0.97460400  |
| O | 2.46864500  | -1.97978800 | -0.33895600 |
| C | 3.20787700  | 0.76525100  | 0.24080800  |
| H | 3.45710400  | 0.99038600  | 1.28866900  |
| C | 4.17844300  | -0.31117500 | -0.26639200 |
| H | 4.07533100  | -0.35984200 | -1.36001200 |
| C | 3.77182300  | -1.70012100 | 0.23281100  |
| C | 3.46873200  | 2.04934900  | -0.57620000 |
| C | 4.90556700  | 2.48097400  | -0.42793100 |
| C | 5.95658100  | 1.42408300  | -0.64902200 |
| H | 6.92754400  | 1.81382400  | -0.34199200 |
| H | 5.98345900  | 1.25287200  | -1.73277600 |
| C | 5.61574000  | 0.09851100  | 0.04900600  |
| H | 6.32396200  | -0.66075600 | -0.28698500 |
| H | 5.73921400  | 0.21088000  | 1.13087800  |
| C | 3.68833400  | -1.80621500 | 1.75275400  |
| H | 3.39755100  | -2.82158800 | 2.03245200  |
| H | 4.66325200  | -1.59445000 | 2.19737300  |
| H | 2.95957100  | -1.10911500 | 2.17059900  |
| C | 4.66867700  | -2.79265000 | -0.32684600 |
| H | 4.79478900  | -2.67492600 | -1.40610600 |
| H | 5.65035700  | -2.76589500 | 0.14796600  |
| H | 4.22071800  | -3.76885200 | -0.12794400 |
| C | -2.33704400 | -1.19207400 | -0.22772300 |
| C | -3.38486800 | -0.08446100 | 0.00209500  |
| H | -3.27223200 | 0.29788100  | 1.02331000  |
| H | -3.16405300 | 0.75215200  | -0.67109100 |
| C | -4.84878700 | -0.47925100 | -0.19933900 |
| H | -5.11161100 | -1.32565500 | 0.44384700  |
| H | -5.01764700 | -0.80207700 | -1.23174700 |
| C | -5.79318700 | 0.68226800  | 0.10821700  |
| H | -5.64044000 | 1.01055500  | 1.14348700  |
| H | -5.53671600 | 1.53663900  | -0.53012000 |

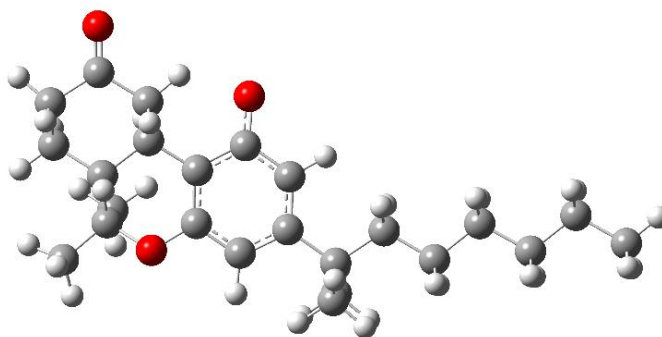

|   |              |             |             |
|---|--------------|-------------|-------------|
| C | -7.26335000  | 0.32615600  | -0.09504600 |
| H | -7.52232500  | -0.52562000 | 0.54592400  |
| H | -7.41697100  | -0.00524500 | -1.12943100 |
| H | 3.29974000   | 1.82711700  | -1.63734600 |
| H | 2.81806700   | 2.86748000  | -0.27980900 |
| O | 5.20378800   | 3.63320300  | -0.15664900 |
| C | -2.49153200  | -1.76218900 | -1.64775700 |
| H | -2.39902400  | -0.96873000 | -2.39597500 |
| H | -1.72966500  | -2.51605000 | -1.85476100 |
| H | -3.46726100  | -2.23767400 | -1.77062800 |
| C | -2.54871700  | -2.32479100 | 0.79187000  |
| H | -2.46798700  | -1.94377700 | 1.81449400  |
| H | -3.53441300  | -2.77997500 | 0.67103400  |
| H | -1.80354800  | -3.11255000 | 0.66255400  |
| C | -8.21011100  | 1.48557000  | 0.20521800  |
| H | -8.05526600  | 1.81762000  | 1.23759300  |
| H | -7.95270300  | 2.33477000  | -0.43716200 |
| C | -9.67516900  | 1.11183200  | 0.00006800  |
| H | -9.95890000  | 0.28073800  | 0.65189900  |
| H | -10.33945800 | 1.95111500  | 0.21865900  |
| H | -9.85584600  | 0.80115100  | -1.03285600 |

# cannabinol

Charge=0, Multiplicity=1

|   |             |             |             |
|---|-------------|-------------|-------------|
| C | -1.53878288 | -1.85712912 | 0.23232674  |
| C | -0.18259388 | -1.66079412 | 0.01205574  |
| C | 0.46429912  | -0.44323012 | 0.27804474  |
| C | -0.32098488 | 0.56164188  | 0.86849474  |
| C | -1.68106188 | 0.37481488  | 1.10191174  |
| C | -2.30480288 | -0.82734212 | 0.77489374  |
| H | -1.97943588 | -2.81891712 | -0.00561526 |
| H | -2.25080888 | 1.18057288  | 1.55551374  |
| O | 0.28424212  | 1.73329188  | 1.23013674  |
| H | -0.35967988 | 2.30813588  | 1.66383074  |
| O | 0.52719612  | -2.70534712 | -0.51631526 |
| C | 1.89059112  | -0.33265612 | -0.09137426 |
| C | 2.60924012  | -1.52562112 | -0.28032126 |
| C | 1.89435012  | -2.84367412 | -0.04214426 |
| C | 2.53436912  | 0.88973588  | -0.33488526 |
| C | 3.87378812  | 0.94798388  | -0.71190726 |
| C | 4.57994812  | -0.24772312 | -0.85847226 |
| C | 3.94985212  | -1.46893712 | -0.65472226 |
| C | 1.87792612  | -3.19630012 | 1.44452274  |

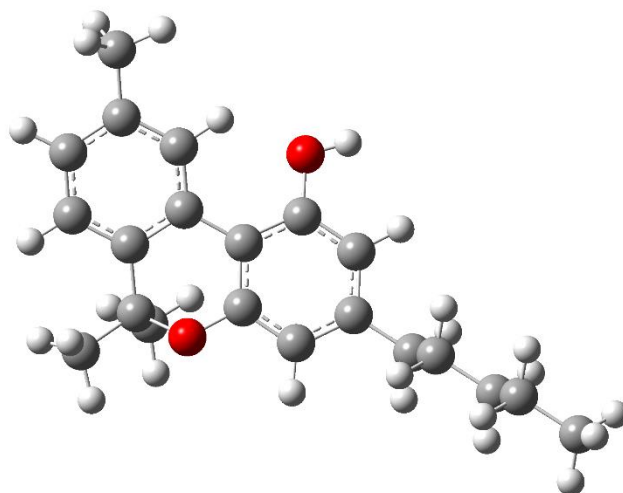

|   |             |             |             |
|---|-------------|-------------|-------------|
| H | 1.31268012  | -4.11834312 | 1.60122574  |
| H | 2.90334312  | -3.34804512 | 1.78752774  |
| H | 1.43134112  | -2.39793412 | 2.04123274  |
| C | 2.45517112  | -3.99593912 | -0.85768326 |
| H | 2.50734012  | -3.73506312 | -1.91648126 |
| H | 3.45169212  | -4.26628112 | -0.50779126 |
| H | 1.80472412  | -4.86397712 | -0.73495626 |
| C | 4.55162912  | 2.26952688  | -0.96081926 |
| H | 5.36997212  | 2.42341388  | -0.25275726 |
| H | 4.97940012  | 2.30347588  | -1.96562526 |
| H | 3.84948412  | 3.09747288  | -0.85674626 |
| C | -3.78808688 | -0.99676912 | 0.97192274  |
| H | -4.11733288 | -0.39067812 | 1.82092274  |
| H | -4.00901988 | -2.04242512 | 1.20529474  |
| C | -4.57729288 | -0.58397412 | -0.27716626 |
| H | -4.34964288 | 0.46130388  | -0.51543626 |
| H | -4.23902888 | -1.18472412 | -1.12910926 |
| C | -6.08261088 | -0.75259112 | -0.09637126 |
| H | -6.41411188 | -0.15465512 | 0.76120474  |
| H | -6.30349388 | -1.79872812 | 0.14784874  |
| C | -6.87961688 | -0.34502212 | -1.33296926 |
| H | -6.65608388 | 0.69939188  | -1.57592026 |
| H | -6.54612888 | -0.94297012 | -2.18796126 |
| C | -8.38315888 | -0.51780212 | -1.13956926 |
| H | -8.74018988 | 0.09271088  | -0.30542026 |
| H | -8.93977388 | -0.22416812 | -2.03245926 |
| H | -8.62886788 | -1.56026412 | -0.91844726 |
| H | 5.62571912  | -0.22190412 | -1.14762226 |
| H | 4.51326112  | -2.38415812 | -0.79313026 |
| H | 1.98168412  | 1.81407888  | -0.24131026 |

**cannabinol anion**

Charge=-1, Multiplicity=1

|   |             |             |             |
|---|-------------|-------------|-------------|
| C | 1.53024731  | 1.47941934  | 0.24875327  |
| C | 0.17118831  | 1.34123534  | 0.01366727  |
| C | -0.53682769 | 0.14876634  | 0.23142527  |
| C | 0.16652131  | -0.96791466 | 0.80265727  |
| C | 1.56524131  | -0.79666866 | 1.03105627  |
| C | 2.23944531  | 0.38153634  | 0.75673027  |
| H | 2.01655831  | 2.42836134  | 0.05166927  |
| H | 2.10405231  | -1.64217166 | 1.45002827  |
| O | -0.41343669 | -2.08097566 | 1.11572027  |
| O | -0.48313169 | 2.44198034  | -0.49906273 |
| C | -1.95878969 | 0.13099534  | -0.15524773 |
| C | -2.62247769 | 1.36441334  | -0.32544373 |
| C | -1.84396769 | 2.63527634  | -0.03835973 |
| C | -2.66987169 | -1.04668766 | -0.43090973 |
| C | -4.00808569 | -1.02686566 | -0.82587273 |
| C | -4.64920769 | 0.20354934  | -0.96301973 |
| C | -3.95522269 | 1.38664734  | -0.72146473 |
| C | -1.83201069 | 2.94021534  | 1.46000727  |
| H | -1.21291369 | 3.81961034  | 1.65577827  |
| H | -2.85122069 | 3.14535434  | 1.79395127  |
| H | -1.44452369 | 2.09686034  | 2.03546627  |
| C | -2.33638269 | 3.84212134  | -0.81983273 |
| H | -2.38077269 | 3.62220534  | -1.88842673 |
| H | -3.32619169 | 4.14686734  | -0.47893873 |
| H | -1.64927769 | 4.67465334  | -0.65580673 |
| C | -4.74477669 | -2.31688566 | -1.07757173 |
| H | -5.13339869 | -2.72784566 | -0.14115673 |
| H | -5.59116469 | -2.16203266 | -1.74865573 |
| H | -4.08428269 | -3.06744466 | -1.51564973 |
| C | 3.72948331  | 0.48933334  | 0.96871627  |
| H | 4.05821831  | -0.28496066 | 1.66820227  |
| H | 3.96734231  | 1.45929134  | 1.41823327  |
| C | 4.51252131  | 0.34820134  | -0.34233873 |
| H | 4.27701531  | -0.62099866 | -0.79712573 |
| H | 4.17704831  | 1.11790534  | -1.04661173 |
| C | 6.02023331  | 0.46585134  | -0.14010373 |
| H | 6.35297431  | -0.30195766 | 0.56898327  |
| H | 6.24915531  | 1.43517234  | 0.31946027  |
| C | 6.80933031  | 0.32639534  | -1.43953473 |
| H | 6.58163031  | -0.64315466 | -1.89555773 |
| H | 6.47246831  | 1.09121234  | -2.14769073 |

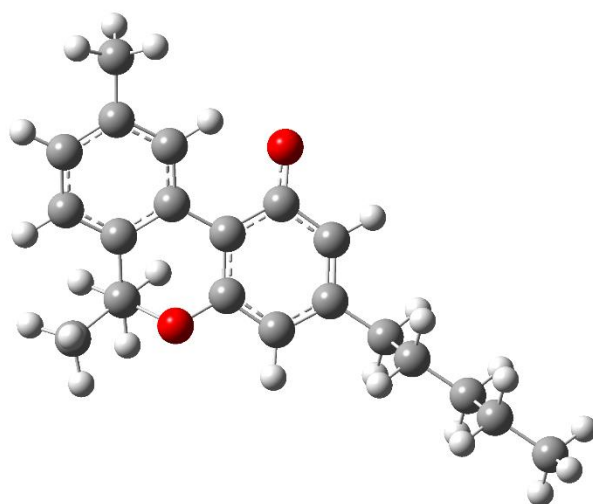

|   |             |             |             |
|---|-------------|-------------|-------------|
| C | 8.31458431  | 0.45249934  | -1.22424973 |
| H | 8.67488731  | -0.31884266 | -0.53777273 |
| H | 8.86501631  | 0.35021134  | -2.16229573 |
| H | 8.56487631  | 1.42567334  | -0.79256573 |
| H | -5.68916469 | 0.23991834  | -1.27054673 |
| H | -4.46700369 | 2.33354034  | -0.84947073 |
| H | -2.16342669 | -1.99767266 | -0.34133173 |

# cannabichromene

Charge=0, Multiplicity=1

|   |             |             |             |
|---|-------------|-------------|-------------|
| C | 2.19651400  | -2.12915800 | 0.85822900  |
| C | 0.93201300  | -2.62268500 | 1.16942000  |
| C | -0.18032200 | -2.32164300 | 0.37511300  |
| C | 0.02885600  | -1.48782000 | -0.73606100 |
| C | 1.28339600  | -0.99860000 | -1.06370000 |
| C | 2.38151700  | -1.32235900 | -0.26168300 |
| H | 3.03188200  | -2.38532000 | 1.50071700  |
| H | 1.39785500  | -0.36940200 | -1.93963800 |
| O | -1.01208600 | -1.20807600 | -1.57970200 |
| O | 0.84313400  | -3.42221200 | 2.27935900  |
| C | 3.73673200  | -0.74153000 | -0.57095100 |
| H | 3.88774700  | -0.72450000 | -1.65466900 |
| H | 4.51494000  | -1.37654100 | -0.13824300 |
| C | 3.88607000  | 0.68410800  | -0.02443400 |
| H | 3.09706900  | 1.31508200  | -0.44914100 |
| H | 3.73130500  | 0.66973900  | 1.06053000  |
| C | 5.25027800  | 1.28892400  | -0.34085200 |
| H | 5.40210000  | 1.29113700  | -1.42707200 |
| H | 6.03676800  | 0.65301900  | 0.08324600  |
| C | 5.40928300  | 2.71053200  | 0.19246100  |
| H | 4.62102900  | 3.34264500  | -0.23050500 |
| H | 5.25778600  | 2.70629200  | 1.27727800  |
| C | 6.77583000  | 3.30540800  | -0.13390300 |
| H | 6.93609600  | 3.33976300  | -1.21517900 |
| H | 6.87424800  | 4.32252800  | 0.25219700  |
| H | 7.57658800  | 2.70172800  | 0.30236200  |
| C | -1.52635800 | -2.85685600 | 0.57749400  |
| H | -1.68135400 | -3.70349500 | 1.23811600  |
| C | -2.55478700 | -2.32678000 | -0.08768800 |
| H | -3.56236200 | -2.71273100 | 0.02083800  |
| C | -2.34633700 | -1.14313600 | -1.00184700 |
| C | -3.28562400 | -1.19373800 | -2.19489200 |
| H | -4.32302300 | -1.20699500 | -1.85826100 |

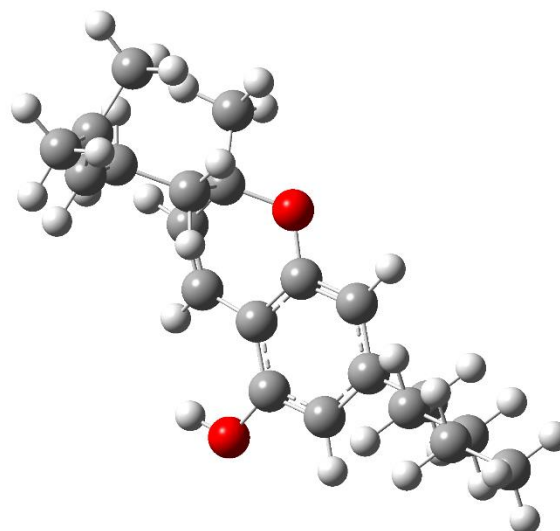

|   |             |             |             |
|---|-------------|-------------|-------------|
| H | -3.13239200 | -0.31988100 | -2.83234500 |
| H | -3.10143800 | -2.09902400 | -2.77685500 |
| C | -2.45409500 | 0.18401000  | -0.23718300 |
| H | -2.23509000 | 0.99460900  | -0.94114800 |
| H | -1.67947700 | 0.20143400  | 0.53798700  |
| C | -3.82170200 | 0.43152800  | 0.41292600  |
| H | -4.59961400 | 0.43104500  | -0.35399800 |
| H | -4.05127900 | -0.38767600 | 1.10000500  |
| C | -3.83391600 | 1.73352300  | 1.17246500  |
| C | -4.06803800 | 2.94104900  | 0.64784500  |
| C | -4.02922400 | 4.18740100  | 1.48978800  |
| H | -3.80176600 | 3.96340800  | 2.53325500  |
| H | -3.27532300 | 4.88417100  | 1.10923900  |
| H | -4.99076900 | 4.70930000  | 1.44609200  |
| C | -4.37339800 | 3.17824500  | -0.80641900 |
| H | -4.39009600 | 2.26251700  | -1.39744900 |
| H | -5.34064100 | 3.68004800  | -0.91379200 |
| H | -3.62338700 | 3.84921800  | -1.23802800 |
| H | -0.07200400 | -3.66869600 | 2.45778400  |
| H | -3.59391300 | 1.67634300  | 2.23266200  |

# cannabichromene anion

Charge=-1, Multiplicity=1

|   |             |             |             |
|---|-------------|-------------|-------------|
| C | 2.40981600  | -2.01083726 | 1.65668013  |
| C | 1.13354500  | -2.52661626 | 2.02380713  |
| C | 0.06202100  | -2.28946026 | 1.10620113  |
| C | 0.30059100  | -1.57077526 | -0.07156587 |
| C | 1.55534400  | -1.08461426 | -0.40914787 |
| C | 2.62166200  | -1.31390926 | 0.47482013  |
| H | 3.23951300  | -2.18181026 | 2.33733313  |
| H | 1.69693500  | -0.54070926 | -1.33661287 |
| O | -0.71896800 | -1.40090126 | -0.98477087 |
| O | 0.95302000  | -3.18156826 | 3.12843713  |
| C | 3.98143100  | -0.73867426 | 0.16110913  |
| H | 4.18172300  | -0.83056926 | -0.91145287 |
| H | 4.75173600  | -1.30908626 | 0.68877413  |
| C | 4.09214500  | 0.73819174  | 0.56016013  |
| H | 3.32028700  | 1.31181074  | 0.03443913  |
| H | 3.88370700  | 0.83516774  | 1.63195513  |
| C | 5.46522700  | 1.32713774  | 0.25107613  |
| H | 5.67205500  | 1.22193174  | -0.82097787 |
| H | 6.23484300  | 0.74774974  | 0.77556713  |
| C | 5.58690700  | 2.79704374  | 0.64513313  |

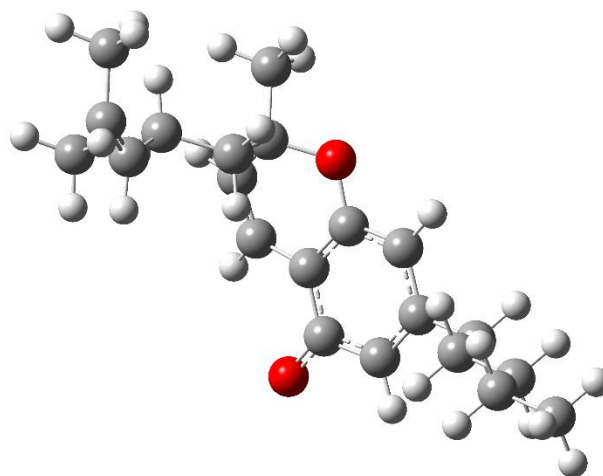

|   |             |             |             |
|---|-------------|-------------|-------------|
| H | 4.81800100  | 3.37422474  | 0.12022213  |
| H | 5.37822800  | 2.90004174  | 1.71550113  |
| C | 6.96502100  | 3.37237474  | 0.33238513  |
| H | 7.18206100  | 3.30138074  | -0.73715087 |
| H | 7.03682900  | 4.42379874  | 0.61999413  |
| H | 7.74531600  | 2.82395074  | 0.86757513  |
| C | -1.27463200 | -2.83373026 | 1.30386413  |
| H | -1.41324600 | -3.60341726 | 2.05575813  |
| C | -2.29527100 | -2.41218226 | 0.54835913  |
| H | -3.29567600 | -2.81930726 | 0.64721013  |
| C | -2.07087700 | -1.30623926 | -0.45744787 |
| C | -2.97358300 | -1.46303426 | -1.66942687 |
| H | -4.02072200 | -1.45760726 | -1.36263187 |
| H | -2.80965800 | -0.64453626 | -2.37443787 |
| H | -2.76747900 | -2.41193726 | -2.16901487 |
| C | -2.21687700 | 0.08018774  | 0.19052813  |
| H | -1.95552200 | 0.83515874  | -0.55946787 |
| H | -1.48545800 | 0.15581174  | 1.00321613  |
| C | -3.61695200 | 0.37229774  | 0.74463113  |
| H | -4.34139100 | 0.40418474  | -0.07003087 |
| H | -3.91429600 | -0.44977326 | 1.40584613  |
| C | -3.62795700 | 1.65170574  | 1.53287713  |
| C | -4.24856300 | 2.79845874  | 1.23412513  |
| C | -4.14337900 | 3.99615974  | 2.14114013  |
| H | -3.53147600 | 3.78645874  | 3.01988413  |
| H | -3.70682300 | 4.84564274  | 1.60587613  |
| H | -5.13717600 | 4.31199274  | 2.47525413  |
| C | -5.09154800 | 3.03151374  | 0.00970213  |
| H | -5.12326500 | 2.17830874  | -0.66614687 |
| H | -6.11758900 | 3.27850674  | 0.30171713  |
| H | -4.70870100 | 3.89436674  | -0.54463487 |
| H | -3.03715600 | 1.62678974  | 2.44858113  |



**cannabigerol**

Charge=0, Multiplicity=1

|   |             |             |             |
|---|-------------|-------------|-------------|
| C | 2.57542600  | -1.14672000 | 1.48678800  |
| C | 1.24559300  | -1.54845700 | 1.59976900  |
| C | 0.48797000  | -1.91938900 | 0.48684900  |
| C | 1.11880900  | -1.84757100 | -0.75822800 |
| C | 2.44663400  | -1.45067100 | -0.89402300 |
| C | 3.18543000  | -1.09901800 | 0.23486100  |
| H | 3.12876100  | -0.87356600 | 2.38052700  |
| H | 2.89739700  | -1.41858800 | -1.88165100 |
| O | 0.36328200  | -2.19453700 | -1.84872500 |
| H | 0.89734200  | -2.11668800 | -2.64924500 |
| O | 0.62262700  | -1.59628500 | 2.82283600  |
| C | 4.60440700  | -0.61013400 | 0.09580000  |
| H | 5.07767700  | -1.09861000 | -0.76111000 |
| H | 5.17523600  | -0.88377600 | 0.98809400  |
| C | 4.66986400  | 0.91033600  | -0.09443800 |
| H | 4.09181600  | 1.18514100  | -0.98417500 |
| H | 4.18799700  | 1.39896200  | 0.76018000  |
| C | 6.10090700  | 1.41954200  | -0.23576300 |
| H | 6.58001100  | 0.92342600  | -1.08857700 |
| H | 6.67611200  | 1.13604900  | 0.65401700  |
| C | 6.17898200  | 2.93242900  | -0.42469400 |
| H | 5.60341300  | 3.21340100  | -1.31327300 |
| H | 5.69888200  | 3.42577100  | 0.42732800  |
| C | 7.61501000  | 3.42870800  | -0.56413600 |
| H | 8.10427200  | 2.96518400  | -1.42541400 |
| H | 7.65467300  | 4.51201900  | -0.69891900 |
| H | 8.20025400  | 3.17927700  | 0.32539300  |
| H | 1.24960800  | -1.34074400 | 3.51085400  |
| C | -0.96254400 | -2.32895400 | 0.59804800  |
| H | -1.16103600 | -3.15464100 | -0.08490000 |
| H | -1.14764600 | -2.69571000 | 1.61008900  |
| C | -2.77439100 | -1.03537800 | -0.66006300 |
| C | -3.58974100 | 0.22935100  | -0.78799300 |
| H | -3.24842700 | 0.96621700  | -0.05510200 |
| H | -3.43230500 | 0.66084500  | -1.78435700 |
| C | -5.10134500 | 0.00063200  | -0.59224800 |
| H | -5.26096300 | -0.46164300 | 0.38645500  |
| H | -5.46184500 | -0.70904400 | -1.34085900 |
| C | -5.87889200 | 1.28502500  | -0.71753400 |
| C | -6.06054900 | 2.18999200  | 0.25050600  |
| C | -6.82920800 | 3.46064700  | 0.00843500  |

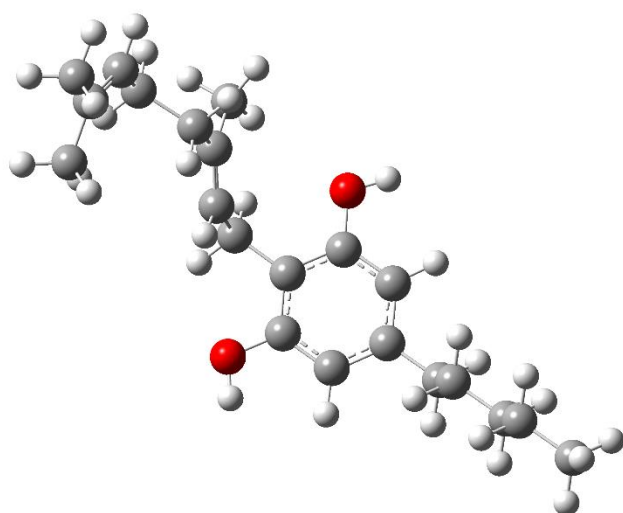

|   |             |             |             |
|---|-------------|-------------|-------------|
| H | -7.68717200 | 3.52471300  | 0.68571000  |
| H | -6.20123300 | 4.33398000  | 0.21266000  |
| H | -7.19139800 | 3.52450800  | -1.01896400 |
| C | -1.87142500 | -1.15732400 | 0.31958600  |
| H | -1.74140700 | -0.31487500 | 0.99864000  |
| H | -6.29240300 | 1.50452900  | -1.70051900 |
| C | -3.07762000 | -2.09748300 | -1.68397700 |
| H | -3.14056300 | -1.64683100 | -2.67949000 |
| H | -2.33078900 | -2.88905900 | -1.71352100 |
| H | -4.04969500 | -2.55943700 | -1.48498600 |
| C | -5.51888900 | 2.04335500  | 1.64651300  |
| H | -4.98726500 | 1.10509800  | 1.80387800  |
| H | -4.83144600 | 2.86678300  | 1.86696600  |
| H | -6.33169400 | 2.11039000  | 2.37702900  |

# **cannabigerol anion C1'**

Charge=-1, Multiplicity=1

|   |             |             |             |
|---|-------------|-------------|-------------|
| C | 0.99696609  | -1.41205529 | 2.21990056  |
| C | -0.35200406 | -1.86417507 | 2.24851055  |
| C | -0.95862180 | -2.19178039 | 0.99754772  |
| C | -0.22836089 | -2.01758466 | -0.17478282 |
| C | 1.09139174  | -1.56522812 | -0.18357688 |
| C | 1.70771335  | -1.26355082 | 1.03502856  |
| H | 1.47208963  | -1.17227899 | 3.16766018  |
| H | 1.62196770  | -1.45324003 | -1.12478072 |
| O | -0.87186522 | -2.31803215 | -1.36143234 |
| H | -0.26161819 | -2.17449364 | -2.09497099 |
| O | -1.00474453 | -1.97731979 | 3.37147791  |
| C | 3.11530276  | -0.71693379 | 1.04806802  |
| H | 3.70506988  | -1.19660085 | 0.26004971  |
| H | 3.59263662  | -0.95464004 | 2.00373848  |
| C | 3.15098002  | 0.80174662  | 0.83755422  |
| H | 2.66861195  | 1.04335577  | -0.11655768 |
| H | 2.55853931  | 1.28530821  | 1.62294345  |
| C | 4.56959093  | 1.36325247  | 0.84824748  |
| H | 5.15957622  | 0.87304589  | 0.06410140  |
| H | 5.05105300  | 1.11495878  | 1.80202092  |
| C | 4.61548842  | 2.87509436  | 0.64071802  |
| H | 4.13242570  | 3.12158382  | -0.31101097 |
| H | 4.02682465  | 3.36287570  | 1.42519333  |
| C | 6.03975988  | 3.42228199  | 0.65112167  |
| H | 6.63714177  | 2.96559109  | -0.14301105 |
| H | 6.05620854  | 4.50446241  | 0.50281324  |

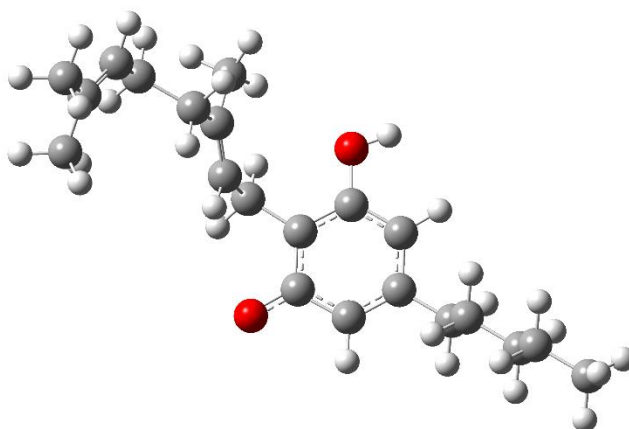

|   |             |             |             |
|---|-------------|-------------|-------------|
| H | 6.53169913  | 3.20666985  | 1.60377458  |
| C | -2.39136169 | -2.67133939 | 0.94460047  |
| H | -2.51802185 | -3.39644557 | 0.14068623  |
| H | -2.61305462 | -3.18580119 | 1.88393085  |
| C | -4.20178512 | -1.28504035 | -0.21809017 |
| C | -5.07417317 | -0.05184433 | -0.21019306 |
| H | -4.84163140 | 0.56099204  | 0.66578017  |
| H | -4.85571463 | 0.55242847  | -1.09993656 |
| C | -6.58129916 | -0.37336216 | -0.20354183 |
| H | -6.80073890 | -1.01021837 | 0.65818253  |
| H | -6.83210970 | -0.95104374 | -1.09694353 |
| C | -7.41775132 | 0.87856818  | -0.17889200 |
| C | -7.79798216 | 1.55187653  | 0.91254161  |
| C | -8.61404616 | 2.81255904  | 0.81600703  |
| H | -9.55841392 | 2.70068828  | 1.35880342  |
| H | -8.08252414 | 3.65044996  | 1.27879002  |
| H | -8.83702967 | 3.07140628  | -0.22039676 |
| C | -3.34753691 | -1.51575867 | 0.78619665  |
| H | -3.30067006 | -0.77929319 | 1.58869450  |
| H | -7.70376444 | 1.28359803  | -1.14843947 |
| C | -4.38976024 | -2.19225430 | -1.40667347 |
| H | -4.44637385 | -1.59781120 | -2.32419783 |
| H | -3.58557450 | -2.91775592 | -1.51861488 |
| H | -5.33234955 | -2.74360902 | -1.33013660 |
| C | -7.44668094 | 1.14204695  | 2.31700493  |
| H | -6.85472107 | 0.22824783  | 2.36230174  |
| H | -6.87882464 | 1.94105456  | 2.80501112  |
| H | -8.35621645 | 0.99819453  | 2.90946716  |

# **cannabigerol anion C3'**

Charge=-1, Multiplicity=1

|   |             |            |             |
|---|-------------|------------|-------------|
| C | -1.23413236 | 1.52362819 | 1.82453550  |
| C | 0.09850564  | 1.92588619 | 1.93114850  |
| C | 0.86416864  | 2.29326319 | 0.82842250  |
| C | 0.27860764  | 2.23284219 | -0.47450550 |
| C | -1.08188336 | 1.82704519 | -0.56146750 |
| C | -1.82673436 | 1.47879719 | 0.55931250  |
| H | -1.79237836 | 1.25221119 | 2.71576850  |
| H | -1.53913636 | 1.78905419 | -1.54688050 |
| O | 0.96431264  | 2.54505719 | -1.53738850 |
| O | 0.71034264  | 1.97259819 | 3.17257350  |
| C | -3.24859536 | 0.99155119 | 0.41326050  |
| H | -3.70740436 | 1.45456219 | -0.46591850 |

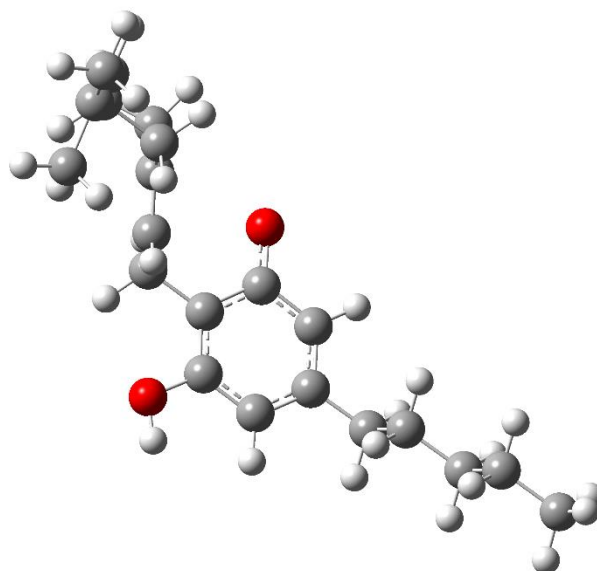

|   |             |             |             |
|---|-------------|-------------|-------------|
| H | -3.83452436 | 1.29673219  | 1.28630950  |
| C | -3.32909136 | -0.53335281 | 0.27126250  |
| H | -2.74434836 | -0.84247881 | -0.60280650 |
| H | -2.86162536 | -1.00044881 | 1.14583350  |
| C | -4.76306336 | -1.03509581 | 0.13034050  |
| H | -5.23001736 | -0.55960481 | -0.74090650 |
| H | -5.34464336 | -0.72125681 | 1.00583750  |
| C | -4.85403636 | -2.55202081 | -0.01617550 |
| H | -4.27456836 | -2.86326081 | -0.89205550 |
| H | -4.38461436 | -3.02547881 | 0.85297550  |
| C | -6.29344436 | -3.03952481 | -0.15228350 |
| H | -6.77269936 | -2.59525681 | -1.02921350 |
| H | -6.34208436 | -4.12573081 | -0.25792950 |
| H | -6.88253436 | -2.76092081 | 0.72600850  |
| H | 0.06924964  | 1.71346319  | 3.84515650  |
| C | 2.31192864  | 2.70473219  | 0.97310650  |
| H | 2.52081564  | 3.53352919  | 0.29557850  |
| H | 2.48762264  | 3.06588819  | 1.98951650  |
| C | 4.14331464  | 1.41729019  | -0.27377550 |
| C | 4.95641564  | 0.15054319  | -0.40087950 |
| H | 4.61377064  | -0.58538281 | 0.33255150  |
| H | 4.79751664  | -0.28218981 | -1.39668850 |
| C | 6.46909564  | 0.37367719  | -0.20699550 |
| H | 6.63232364  | 0.83046919  | 0.77370950  |
| H | 6.82995764  | 1.08629419  | -0.95271350 |
| C | 7.24303564  | -0.91191681 | -0.34126050 |
| C | 7.42873864  | -1.82137681 | 0.62181150  |
| C | 8.19240164  | -3.09307581 | 0.36930750  |
| H | 9.05430064  | -3.16274881 | 1.04103050  |
| H | 7.56321264  | -3.96562981 | 0.57320150  |
| H | 8.54816964  | -3.15324081 | -0.66056250 |
| C | 3.23389664  | 1.54179619  | 0.70032950  |
| H | 3.10172964  | 0.69633819  | 1.37625950  |
| H | 7.64947764  | -1.12891481 | -1.32780750 |
| C | 4.45315264  | 2.47923919  | -1.29662450 |
| H | 4.51796264  | 2.02953419  | -2.29266750 |
| H | 3.70604364  | 3.27046419  | -1.32761550 |
| H | 5.42531964  | 2.94034419  | -1.09519250 |
| C | 6.89638464  | -1.67952481 | 2.02189650  |
| H | 6.36792664  | -0.74074781 | 2.18658050  |
| H | 6.20834464  | -2.50224781 | 2.24312850  |
| H | 7.71356564  | -1.75153381 | 2.74705650  |
